# Supplementary material for: Malaria in the postpartum period causes damage to the mammary gland
Source: PLoS One. 2021 Oct 13;16(10):e0258491. doi: 10.1371/journal.pone.0258491 (PMC8513860; doi:10.1371/journal.pone.0258491)
Supplement: S1 Table — The proteome of mammary gland tissues in postpartum mice infected with Pb ANKA on day 6 post-infection was compared with the proteomes in uninfected virgin and postpartum mice, as well as infected virgin and postpartum mice. Proteins showing one or two peptide spectral matches (PSMs) were excluded. Protein levels were normalized to actin, cytoplasmic 1 (Accession: P60710). (XLSX) [file pone.0258491.s004.xlsx]

## Sheet: Table S1
	S1 Table. Comparative proteomic analysis of mammary gland tissue in mice uninfected or infected postpartum.
	Accession	Description	Abbreviation	Infected	Uninfected	Infected	Score	Coverage	# Proteins	# Unique Peptides	# Peptides	# PSMs	# AAs	MW [kDa]	calc. pI
				Virgin	Postpartum	Postpartum
	P07361	Alpha-1-acid glycoprotein 2 OS	Orm2	7.18985	1.99075	10.7423	134.018	12.08	2	2	3	6	207	23.8282	5.45264
	Q9QZ85	Interferon-inducible GTPase 1 OS	Iigp1	3.75599	1.32405	7.04284	301.445	22.28	1	9	9	13	413	47.5415	6.32861
	P11672	Neutrophil gelatinase-associated lipocalin OS	Lcn2	2.50471	0.598787	2.70525	111.4	13.5	1	3	3	5	200	22.8605	8.80713
	P01872	Immunoglobulin heavy constant mu OS	Ighm	2.55106	0.763176	2.7173	75.87	7.71	1	3	3	4	454	49.9403	7.00537
	Q8K0E8	Fibrinogen beta chain OS	Fgb	1.26591	0.530077	1.85442	113.297	15.38	2	7	7	12	481	54.7177	7.07861
	Q8VCM7	Fibrinogen gamma chain OS	Fgg	1.11941	0.475944	1.5711	148.98	8.03	1	4	4	8	436	49.3598	5.85889
	Q91X72	Hemopexin OS	Hpx	2.00356	0.607159	1.91864	1382.22	43.91	1	22	22	69	460	51.2852	7.79639
	Q9R233	Tapasin OS	Tapbp	1.76867	1.41126	4.14632	179.44	16.56	1	6	6	10	465	49.7051	8.49951
	P08071	Lactotransferrin OS	Ltf	0.233559	0.280665	0.776837	158.067	11.32	1	6	7	14	707	77.788	8.52881
	Q60590	Alpha-1-acid glycoprotein 1 OS	Orm1	1.91153	1.03525	2.7288	192.586	18.36	2	3	4	10	207	23.8801	5.84619
	P21958	Antigen peptide transporter 1 OS	Tap1	1.65422	1.3218	3.32566	120.58	5.11	1	3	3	6	724	78.814	8.79248
	P01173	Whey acidic protein OS	Wap	0.893888	5.1838	12.102	1314.31	17.91	1	4	4	153	134	14.4128	5.05908
	P01887	Beta-2-microglobulin OS	B2m	0.969286	0.947726	2.20765	66.67	35.29	1	3	3	4	119	13.7699	8.44092
	A6X935	Inter alpha-trypsin inhibitor, heavy chain 4 OS	Itih4	1.47089	1.15084	2.64436	82.81	3.72	1	4	4	5	942	104.594	6.40479
	P42225	Signal transducer and activator of transcription 1 OS	Stat1	1.72522	0.848868	1.942	153.604	10.01	1	6	6	8	749	87.1421	5.57959
	Q06890	Clusterin OS	Clu	1.56809	1.50766	3.30637	475.612	20.98	1	10	10	21	448	51.6226	5.66846
	P10810	Monocyte differentiation antigen CD14 OS	Cd14	1.24873	0.379415	0.82279	96.77	9.02	1	3	3	4	366	39.1795	5.21143
	Q61147	Ceruloplasmin OS	Cp	1.21288	0.491218	1.05454	276.766	11.4	1	12	12	22	1061	121.074	5.84619
	E9PV24	Fibrinogen alpha chain OS	Fga	1.06077	0.796675	1.68544	184.436	6.72	1	5	5	9	789	87.3753	6.11279
	P02798	Metallothionein-2 OS	Mt2	1.51434	3.09894	6.38442	63.66	13.11	1	1	1	3	61	6.11021	7.82568
	Q61838	Pregnancy zone protein OS	Pzp	0.936877	0.487427	0.996265	630.821	16.52	2	23	23	46	1495	165.748	6.68311
	P01898	H-2 class I histocompatibility antigen, Q10 alpha chain OS	H2-Q10	1.17757	0.903852	1.79385	119.339	8.92	1	1	3	7	325	37.2273	5.24951
	Q3U5Q7	UMP-CMP kinase 2, mitochondrial OS	Cmpk2	1.40532	1.47977	2.9241	210.82	22.6	1	6	6	12	447	50.0047	7.26904
	Q02596	Glycosylation-dependent cell adhesion molecule 1 OS	Glycam1	4.05051	3.94256	7.4531	392.232	25.17	1	2	2	21	151	16.1991	4.55127
	P28798	Progranulin OS	Grn	1.27883	0.746512	1.40901	40.9951	5.26	1	2	2	3	589	63.4131	6.80029
	Q8BND5	Sulfhydryl oxidase 1 OS	Qsox1	0.563273	2.2777	4.26271	403.389	18.18	1	15	15	32	748	82.733	7.1665
	P97372	Proteasome activator complex subunit 2 OS	Psme2	1.35517	1.20983	2.22667	52.04	11.72	1	2	2	3	239	27.0401	5.75732
	P01901	H-2 class I histocompatibility antigen, K-B alpha chain OS	H2-K1	1.43786	1.18494	2.16199	209.473	16.26	4	3	5	12	369	41.2756	6.39209
	P06796	Kappa-casein OS	Csn3	1.46665	4.76366	8.60666	2681.35	33.15	1	5	5	161	181	20.0171	4.93213
	Q80SU7	Interferon-induced very large GTPase 1 OS	Gvin1	3.20526	0.620221	1.08906	125.47	1.19	1	3	3	6	2427	280.637	6.56592
	P08226	Apolipoprotein E OS	Apoe	0.904193	0.938577	1.58317	130.719	16.08	1	5	5	7	311	35.8444	5.68115
	P28665	Murinoglobulin-1 OS	Mug1	0.682175	0.380895	0.594231	51.7634	2.17	2	4	4	4	1476	165.193	6.41748
	P01029	Complement C4-B OS	C4b	1.24873	1.3058	2.03161	66	0.92	1	2	2	4	1738	192.794	7.53271
	P01899	H-2 class I histocompatibility antigen, D-B alpha chain OS	H2-D1	0.966388	0.85159	1.32332	289.796	17.4	10	2	6	13	362	40.8103	6.72705
	Q61247	Alpha-2-antiplasmin OS	Serpinf2	0.827581	0.495631	0.760643	24.21	4.68	1	2	2	3	491	54.9371	6.30322
	Q9WUU7	Cathepsin Z OS	Ctsz	1.0255	0.524612	0.802271	71.06	10.13	1	3	3	4	306	33.9742	6.59521
	Q14AE4	WAP four-disulfide core domain protein 3 OS	Wfdc3	1.4002	17.1427	25.2684	93.8232	29.23	1	2	2	3	130	13.7083	5.43994
	P55065	Phospholipid transfer protein OS	Pltp	1.04156	0.401689	0.570798	125.14	2.23	1	1	1	4	493	54.4185	6.62451
	Q9EQK5	Major vault protein OS	Mvp	0.927915	1.11417	1.58148	41.1033	0.81	1	1	1	3	861	95.8652	5.59229
	P01878	Ig alpha chain C region OS	1	1.622	3.36586	4.69914	130.68	6.69	1	2	2	5	344	36.8523	5.05908
	Q00623	Apolipoprotein A-I OS	Apoa1	1.19047	0.966691	1.32795	767.842	50.38	2	15	15	45	264	30.5966	5.73193
	P97371	Proteasome activator complex subunit 1 OS	Psme1	1.40046	1.04844	1.37437	170.47	19.68	1	4	4	5	249	28.655	5.97314
	O08807	Peroxiredoxin-4 OS	Prdx4	0.684544	2.21019	2.88469	330.186	36.86	1	6	8	20	274	31.0331	7.15186
	E9PVA8	eIF-2-alpha kinase activator GCN1 OS	Gcn1	0.926134	8.83601	11.4012	39.1267	0.67	1	2	2	3	2671	292.834	7.35693
	O08677	Kininogen-1 OS	Kng1	0.854799	0.887736	1.14463	324.837	15.28	1	8	8	14	661	73.0564	6.53662
	P02664	Alpha-S2-casein-like B OS	Csn1s2b	0.786323	3.682	4.68522	520.913	37.06	1	6	6	64	143	16.9002	6.11279
	P21614	Vitamin D-binding protein OS	Gc	0.724241	0.685196	0.863136	577.711	26.68	1	12	12	29	476	53.565	5.50342
	Q61207	Prosaposin OS	Psap	1.39256	0.544474	0.67859	566.517	15.62	1	8	8	26	557	61.3814	5.18604
	P08207	Protein S100-A10 OS	S100a10	0.52158	0.139913	0.171819	67.0467	17.53	1	1	1	3	97	11.1785	6.771
	P07759	Serine protease inhibitor A3K OS	Serpina3k	0.764079	0.651884	0.785402	310.857	24.4	6	8	8	12	418	46.85	5.16064
	P01027	Complement C3 OS	C3	0.782634	0.557028	0.665013	670.582	13.17	1	22	22	34	1663	186.366	6.72705
	Q99KQ4	Nicotinamide phosphoribosyltransferase OS	Nampt	0.941814	2.36462	2.80118	250.579	24.03	1	11	11	19	491	55.4125	7.15186
	P21956	Lactadherin OS	Mfge8	1.95139	2.62386	3.10674	275.143	21.81	1	8	8	13	463	51.2077	6.52197
	Q9CPY7	Cytosol aminopeptidase OS	Lap3	0.944046	2.23944	2.61251	515.67	24.66	1	11	11	21	519	56.1058	7.72314
	Q9QYB1	Chloride intracellular channel protein 4 OS	Clic4	0.863866	0.998237	1.15968	50.5333	9.88	1	2	2	3	253	28.7107	5.59229
	P18242	Cathepsin D OS	Ctsd	0.863993	0.749388	0.865926	288.835	18.54	1	7	7	16	410	44.925	7.15186
	Q61823	Programmed cell death protein 4 OS	Pdcd4	0.599586	3.33764	3.85452	131.78	4.69	1	2	2	3	469	51.67	5.16064
	P10605	Cathepsin B OS	Ctsb	0.826716	1.04627	1.19335	396.44	29.79	1	8	8	17	339	37.2557	5.90967
	Q9CQ19	Myosin regulatory light polypeptide 9 OS	Myl9	0.699286	2.35988	2.61735	145.47	23.84	1	3	3	5	172	19.8415	4.91943
	P23953	Carboxylesterase 1C OS	Ces1c	0.758867	0.588709	0.648383	224.67	15.52	2	4	7	13	554	61.017	5.05908
	Q8VEK3	Heterogeneous nuclear ribonucleoprotein U OS	Hnrnpu	0.836427	1.02347	1.12617	83.1	3.75	1	2	2	3	800	87.8627	6.23975
	P07758	Alpha-1-antitrypsin 1-1 OS	Serpina1a	0.582671	0.485933	0.528317	286.316	10.9	2	3	7	21	413	45.9735	5.71924
	P70124	Serpin B5 OS	Serpinb5	0.924066	2.7611	2.99483	128.827	9.33	1	3	3	6	375	42.0845	5.77002
	Q9EQU5	Protein SET OS	Set	0.827164	1.49826	1.62476	72.4867	13.49	1	3	3	3	289	33.3577	4.32275
	Q60605	Myosin light polypeptide 6 OS	Myl6	0.686781	1.82278	1.96197	233.782	47.02	2	7	7	14	151	16.9191	4.65283
	Q19LI2	Alpha-1B-glycoprotein OS	A1bg	0.953099	1.55353	1.66518	110.906	7.81	1	5	5	7	512	56.5176	6.78564
	P20152	Vimentin OS	Vim	0.519832	0.216998	0.232475	1536.01	57.73	8	24	28	86	466	53.6551	5.12256
	P62827	GTP-binding nuclear protein Ran OS	Ran	1.10528	1.78337	1.90487	174.347	24.07	2	4	4	7	216	24.4076	7.48877
	Q9R111	Guanine deaminase OS	Gda	0.916623	0.783059	0.82821	43.8133	4.41	1	2	2	3	454	50.9807	5.52881
	O08638	Myosin-11 OS	Myh11	0.668379	3.40459	3.58729	2054.8	25.76	2	39	48	104	1972	226.888	5.45264
	P68372	Tubulin beta-4B chain OS	Tubb4b	1.03944	2.47272	2.60243	915.75	54.83	4	4	18	41	445	49.799	4.89404
	Q9QZD9	Eukaryotic translation initiation factor 3 subunit I OS	Eif3i	0.850195	2.10046	2.20334	79.17	10.77	1	3	3	4	325	36.4376	5.64307
	P97315	Cysteine and glycine-rich protein 1 OS	Csrp1	0.908449	1.24026	1.29877	132.52	29.02	1	3	3	4	193	20.5698	8.57275
	P37804	Transgelin OS	Tagln	0.457681	1.07257	1.11908	354.205	52.24	2	10	11	24	201	22.5614	8.80713
	P29699	Alpha-2-HS-glycoprotein OS	Ahsg	0.592318	0.623408	0.650131	236.58	27.54	1	6	6	12	345	37.3017	6.50732
	P23492	Purine nucleoside phosphorylase OS	Pnp	1.02951	0.697734	0.724925	104.66	18.69	1	4	4	4	289	32.2561	6.16357
	Q62159	Rho-related GTP-binding protein RhoC OS	Rhoc	0.718612	0.860596	0.887205	57.1	7.25	2	1	1	4	193	21.9923	6.58057
	P99024	Tubulin beta-5 chain OS	Tubb5	0.745165	1.01529	1.04471	893.891	51.13	2	3	17	40	444	49.639	4.89404
	O35522	Proteasome subunit beta type-9 OS	Psmb9	1.05355	0.995899	1.02398	65.2933	4.57	3	1	1	3	219	23.4117	5.22412
	Q8BG05	Heterogeneous nuclear ribonucleoprotein A3 OS	Hnrnpa3	0.965726	0.579706	0.59566	209.139	15.3	1	5	7	13	379	39.6276	9.01221
	Q60648	Ganglioside GM2 activator OS	Gm2a	1.33615	2.31949	2.37188	79.4	13.99	1	3	3	3	193	20.8108	5.89697
	Q9WV80	Sorting nexin-1 OS	Snx1	0.773075	0.576134	0.586011	118.82	3.64	1	2	2	5	522	58.9156	5.22412
	P35278	Ras-related protein Rab-5C OS	Rab5c	0.854375	0.983761	0.997228	128.19	10.65	3	2	2	3	216	23.3978	8.41162
	P26041	Moesin OS	Msn	0.926325	0.642405	0.647247	205.217	11.09	1	4	7	15	577	67.7249	6.59521
	P32261	Antithrombin-III OS	Serpinc1	0.595509	0.647926	0.652444	120.565	13.12	1	6	6	9	465	51.9706	6.45557
	P07724	Albumin OS	Alb	0.666276	0.570068	0.573186	15326.3	72.7	1	43	43	1251	608	68.6477	6.07471
	P51885	Lumican OS	Lum	0.663274	0.20011	0.201138	282.944	21.01	1	7	7	14	338	38.2406	6.43018
	P11679	Keratin, type II cytoskeletal 8 OS	Krt8	0.232626	0.972007	0.974476	1057.28	35.31	13	15	20	59	490	54.5315	5.8208
	P60710	Actin, cytoplasmic 1 OS	Actb	1	1	1	2052.95	52.27	3	6	16	82	375	41.7097	5.47803
	Q60668	Heterogeneous nuclear ribonucleoprotein D0 OS	Hnrnpd	1.07653	0.9663	0.966294	107.04	7.04	2	2	3	6	355	38.3303	7.81104
	Q9DBC7	cAMP-dependent protein kinase type I-alpha regulatory subunit OS	Prkar1a	0.959521	0.879521	0.87797	147.49	2.89	1	1	1	4	381	43.158	5.35107
	P09405	Nucleolin OS	Ncl	0.767453	1.31005	1.30098	247.524	9.34	1	7	7	11	707	76.6768	4.75439
	P35846	Folate receptor alpha OS	Folr1	1.04044	7.52923	7.47486	52.68	12.55	1	3	3	5	255	29.4295	6.62451
	Q99PT1	Rho GDP-dissociation inhibitor 1 OS	Arhgdia	0.778656	0.681041	0.675984	114.26	11.27	1	2	2	6	204	23.3928	5.19873
	O88569	Heterogeneous nuclear ribonucleoproteins A2/B1 OS	Hnrnpa2b1	0.90712	0.60849	0.603515	545.45	31.16	1	10	12	26	353	37.3797	8.95361
	P54310	Hormone-sensitive lipase OS	Lipe	0.511894	0.411042	0.406905	55.2467	3.82	1	3	3	3	759	83.2947	6.94678
	P05784	Keratin, type I cytoskeletal 18 OS	Krt18	0.471033	1.99847	1.97507	540.511	31.91	11	11	14	29	423	47.5092	5.32568
	P06728	Apolipoprotein A-IV OS	Apoa4	0.808986	0.911994	0.900405	219.616	20.25	1	7	7	11	395	45.001	5.46533
	Q9WVA4	Transgelin-2 OS	Tagln2	0.803702	0.263418	0.259935	167.427	18.09	1	4	4	12	199	22.3812	8.23584
	Q9WUM3	Coronin-1B OS	Coro1b	0.75999	0.80727	0.796537	116.414	1.86	1	1	1	3	484	53.878	5.78271
	Q9D819	Inorganic pyrophosphatase OS	Ppa1	0.939556	1.07674	1.06115	378.761	35.99	1	7	7	14	289	32.6462	5.60498
	P14602	Heat shock protein beta-1 OS	Hspb1	0.908575	0.815764	0.799151	126.197	16.75	1	3	3	6	209	22.9997	6.55127
	P14733	Lamin-B1 OS	Lmnb1	1.04515	0.774436	0.755709	68.4633	1.36	3	1	1	3	588	66.7448	5.16064
	Q9CQM5	Thioredoxin domain-containing protein 17 OS	Txndc17	0.707091	1.20308	1.17335	88.2932	24.39	1	3	3	6	123	14.0057	4.76709
	Q9Z1Q5	Chloride intracellular channel protein 1 OS	Clic1	0.91565	1.67553	1.63034	215.842	23.65	1	5	5	9	241	26.9957	5.17334
	O54724	Caveolae-associated protein 1 OS	Cavin1	0.531664	0.360249	0.349441	455.261	26.02	1	9	9	19	392	43.927	5.51611
	P41105	60S ribosomal protein L28 OS	Rpl28	0.645339	5.64251	5.46203	247.507	38.69	1	7	7	13	137	15.7237	12.0151
	Q00519	Xanthine dehydrogenase/oxidase OS	Xdh	1.12123	3.69012	3.5645	638.696	23.82	4	26	26	44	1335	146.468	7.56201
	Q3U7R1	Extended synaptotagmin-1 OS	Esyt1	0.600432	0.260986	0.251945	95.3365	1.37	1	2	2	5	1092	121.478	5.94775
	P26638	Serine--tRNA ligase, cytoplasmic OS	Sars1	0.858927	3.53429	3.40634	144.382	15.82	1	8	8	11	512	58.3517	6.30322
	Q61937	Nucleophosmin OS	Npm1	0.671874	1.33707	1.2861	125.395	13.01	1	4	4	6	292	32.5398	4.76709
	P31786	Acyl-CoA-binding protein OS	Dbi	0.965557	1.49941	1.44187	395.543	47.13	1	3	3	17	87	9.99414	8.82178
	P19001	Keratin, type I cytoskeletal 19 OS	Krt19	0.238743	0.427684	0.410826	145.072	15.38	16	4	7	12	403	44.5147	5.38916
	P26350	Prothymosin alpha OS	Ptma	1.38452	1.87595	1.80046	145	21.62	1	3	3	5	111	12.2471	3.78955
	P68033	Actin, alpha cardiac muscle 1 OS	Actc1	0.846287	1.3425	1.2856	1530.66	51.46	4	5	15	68	377	41.9919	5.38916
	Q9EPE9	Manganese-transporting ATPase 13A1 OS	Atp13a1	0.716986	6.2396	5.97373	127.35	1.58	1	2	2	5	1200	132.303	8.03076
	P68369	Tubulin alpha-1A chain OS	Tuba1a	0.752415	1.07008	1.02097	962.755	50.78	5	5	17	48	451	50.1036	5.05908
	Q61335	B-cell receptor-associated protein 31 OS	Bcap31	0.644659	0.919202	0.872302	75.52	24.49	1	3	3	4	245	27.939	8.70459
	P62835	Ras-related protein Rap-1A OS	Rap1a	0.90467	0.812873	0.770456	206.567	26.09	2	5	5	13	184	20.9737	6.66846
	Q9JKF1	Ras GTPase-activating-like protein IQGAP1 OS	Iqgap1	0.84791	1.91413	1.80747	292.709	5.07	1	8	8	14	1657	188.624	6.48096
	Q6WVG3	BTB/POZ domain-containing protein KCTD12 OS	Kctd12	0.793687	0.368197	0.3467	22.9633	2.45	1	1	1	4	327	35.8698	5.80811
	P61979	Heterogeneous nuclear ribonucleoprotein K OS	Hnrnpk	0.769261	0.946481	0.887646	489.31	20.09	1	9	9	25	463	50.9444	5.5415
	Q00897	Alpha-1-antitrypsin 1-4 OS	Serpina1d	0.774412	0.757125	0.70881	324.47	15.98	4	4	9	23	413	45.9694	5.43994
	P18760	Cofilin-1 OS	Cfl1	0.896561	0.95058	0.889688	325.271	53.61	2	7	8	18	166	18.5477	8.08936
	Q62167	ATP-dependent RNA helicase DDX3X OS	Ddx3x	0.646987	2.5137	2.35187	186.518	11.93	3	7	7	9	662	73.056	7.18115
	Q9CQI6	Coactosin-like protein OS	Cotl1	1.16006	0.777753	0.725703	219.98	43.66	1	4	4	10	142	15.934	5.40186
	P70122	Ribosome maturation protein SBDS OS	Sbds	0.825256	2.78603	2.5885	64.41	4	1	1	1	3	250	28.7623	8.76318
	P13020	Gelsolin OS	Gsn	0.657006	0.319527	0.296461	262.254	11.92	1	10	10	19	780	85.8881	6.17627
	Q08857	Platelet glycoprotein 4 OS	Cd36	0.49814	0.424885	0.393971	316.506	21.4	1	9	9	18	472	52.6642	8.35303
	Q91VS7	Microsomal glutathione S-transferase 1 OS	Mgst1	0.814254	1.10115	1.01957	102.19	18.71	1	2	2	5	155	17.5401	9.65674
	P60335	Poly(rC)-binding protein 1 OS	Pcbp1	0.749145	1.71554	1.58667	239.29	18.26	2	3	6	15	356	37.4739	7.09326
	P07356	Annexin A2 OS	Anxa2	0.626888	0.61438	0.56758	128.11	15.63	1	4	4	5	339	38.6518	7.69385
	Q8BP47	Asparagine--tRNA ligase, cytoplasmic OS	NARS1	0.773964	3.69287	3.40683	170.355	14.49	1	8	8	11	559	64.238	5.85889
	Q8C0C7	Phenylalanine--tRNA ligase alpha subunit OS	Farsa	0.651319	2.15487	1.98723	74.9067	4.33	1	2	2	3	508	57.5628	8.27979
	Q64521	Glycerol-3-phosphate dehydrogenase, mitochondrial OS	Gpd2	0.552033	0.183905	0.169553	104.48	4.68	1	3	3	5	727	80.9025	6.60986
	P51174	Long-chain specific acyl-CoA dehydrogenase, mitochondrial OS	Acadl	0.78225	0.449769	0.414643	230.838	13.49	1	6	6	14	430	47.8775	8.30908
	O08795	Glucosidase 2 subunit beta OS	Prkcsh	0.711468	0.927254	0.854689	75.26	7.29	1	4	4	5	521	58.7558	4.4624
	Q921I1	Serotransferrin OS	Tf	1.16396	2.37611	2.18944	2776.22	58.25	2	41	42	174	697	76.6737	7.18115
	P40124	Adenylyl cyclase-associated protein 1 OS	Cap1	0.84671	1.10281	1.01404	170.257	11.6	1	6	6	7	474	51.5324	7.51807
	P49817	Caveolin-1 OS	Cav1	0.506598	0.13912	0.12766	104.83	9.55	1	2	2	5	178	20.5255	6.02393
	P61205	ADP-ribosylation factor 3 OS	Arf3	0.767189	2.09098	1.91825	505.646	35.91	3	3	5	22	181	20.5877	7.43018
	P68368	Tubulin alpha-4A chain OS	Tuba4a	0.934217	4.0972	3.758	917.957	51.12	2	5	17	48	448	49.8924	5.05908
	Q9JMH6	Thioredoxin reductase 1, cytoplasmic OS	Txnrd1	0.818331	2.66149	2.43659	102.172	8.65	1	4	4	5	613	67.042	7.44482
	Q99J77	Sialic acid synthase OS	Nans	0.733061	4.50157	4.10905	152.485	13.37	1	5	5	9	359	39.9984	7.06396
	Q64727	Vinculin OS	Vcl	0.702414	0.495832	0.452471	335.441	13.13	1	14	14	21	1066	116.644	5.99854
	P51150	Ras-related protein Rab-7a OS	Rab7a	0.711519	1.50446	1.37265	151.793	25.6	1	5	5	7	207	23.4748	6.69775
	P21107	Tropomyosin alpha-3 chain OS	Tpm3	0.701002	2.00392	1.82801	535.918	24.21	2	2	9	29	285	32.9738	4.71631
	P00329	Alcohol dehydrogenase 1 OS	Adh1	0.56188	0.163952	0.149273	136.268	9.07	1	4	4	6	375	39.7456	8.104
	Q9D7N9	Adipocyte plasma membrane-associated protein OS	Apmap	0.599183	0.865473	0.785436	70.2968	6.75	1	3	3	3	415	46.4047	6.31592
	O88342	WD repeat-containing protein 1 OS	Wdr1	0.80378	1.25847	1.13934	145.311	16.67	1	9	9	11	606	66.365	6.59521
	Q7M6Y3	Phosphatidylinositol-binding clathrin assembly protein OS	Picalm	0.818466	0.702142	0.63505	63.2767	1.52	1	1	1	3	660	71.4983	7.91357
	P56395	Cytochrome b5 OS	Cyb5a	0.685423	0.327352	0.295855	163.53	32.09	1	4	4	10	134	15.2315	5.07178
	Q922B2	Aspartate--tRNA ligase, cytoplasmic OS	Dars1	0.719699	2.52502	2.27294	119.53	18.36	1	9	9	14	501	57.1112	6.49365
	P07901	Heat shock protein HSP 90-alpha OS	Hsp90aa1	0.827521	1.44136	1.29502	748.202	25.24	1	10	17	42	733	84.7348	5.0083
	P62270	40S ribosomal protein S18 OS	Rps18	0.685187	5.7872	5.19742	587.275	43.42	1	9	9	26	152	17.7079	10.9897
	Q7TMK9	Heterogeneous nuclear ribonucleoprotein Q OS	Syncrip	0.747083	3.15824	2.83377	200.909	11.56	1	7	7	10	623	69.5896	8.5874
	P50580	Proliferation-associated protein 2G4 OS	Pa2g4	0.802838	3.85701	3.45194	156.203	17.77	1	7	7	11	394	43.6712	6.85889
	Q7TMK6	Protein Hook homolog 2 OS	Hook2	0.496684	3.63869	3.25246	42.6832	0.98	1	1	1	3	716	83.3146	5.42725
	P11499	Heat shock protein HSP 90-beta OS	Hsp90ab1	0.904646	1.59341	1.42385	1146.57	34.39	1	15	23	63	724	83.2291	5.03369
	P08752	Guanine nucleotide-binding protein G(i) subunit alpha-2 OS	Gnai2	0.924681	0.35969	0.320634	137.57	10.42	10	2	3	5	355	40.463	5.45264
	P59325	Eukaryotic translation initiation factor 5 OS	Eif5	0.789923	3.40641	3.03604	229.41	17.25	1	6	6	10	429	48.9377	5.51611
	Q6ZWY8	Thymosin beta-10 OS	Tmsb10	1.26187	0.225502	0.200672	72.8347	15.91	2	1	1	5	44	5.02255	5.36377
	Q68FD5	Clathrin heavy chain 1 OS	Cltc	0.788353	1.95277	1.73512	1764.1	31.52	1	43	43	91	1675	191.435	5.69385
	Q9D1Q6	Endoplasmic reticulum resident protein 44 OS	Erp44	0.80444	3.18737	2.83165	201.621	11.82	1	5	5	11	406	46.8233	5.2749
	Q9EPB4	Apoptosis-associated speck-like protein containing a CARD OS	Pycard	1.25607	3.13373	2.78127	50.19	8.81	1	2	2	3	193	21.4451	5.42725
	P10639	Thioredoxin OS	Txn	0.83723	1.24031	1.10041	176.271	31.43	1	3	3	7	105	11.6676	4.91943
	P62830	60S ribosomal protein L23 OS	Rpl23	0.660358	6.15331	5.45533	326.392	33.57	1	5	5	14	140	14.8561	10.5063
	Q9WUB3	Glycogen phosphorylase, muscle form OS	Pygm	1.22451	1.60964	1.42648	311.842	14.85	1	7	12	18	842	97.2247	7.10791
	P57759	Endoplasmic reticulum resident protein 29 OS	Erp29	0.859518	1.27078	1.12493	40.48	6.11	1	2	2	3	262	28.8051	6.15088
	Q9D0J8	Parathymosin OS	Ptms	0.801442	0.365147	0.323197	155.325	23.76	1	3	3	8	101	11.4231	4.22119
	P61924	Coatomer subunit zeta-1 OS	Copz1	0.722751	4.10237	3.62888	97.49	11.86	1	2	2	3	177	20.1855	4.80518
	P62880	Guanine nucleotide-binding protein G(I)/G(S)/G(T) subunit beta-2 OS	Gnb2	0.666008	0.338937	0.299678	213.843	10	4	4	4	9	340	37.3071	5.99854
	P10852	4F2 cell-surface antigen heavy chain OS	Slc3a2	0.766274	3.53881	3.12717	238.534	16.92	1	8	8	15	526	58.3003	5.90967
	Q9CQN1	Heat shock protein 75 kDa, mitochondrial OS	Trap1	0.77992	0.584965	0.516818	183.655	3.4	1	1	2	8	706	80.1585	6.68311
	Q04447	Creatine kinase B-type OS	Ckb	0.906733	1.15858	1.02166	106.421	8.4	1	2	3	8	381	42.6863	5.66846
	P57776	Elongation factor 1-delta OS	Eef1d	0.60832	5.40524	4.76181	138.478	11.39	1	3	3	8	281	31.2739	5.021
	Q9Z2U0	Proteasome subunit alpha type-7 OS	Psma7	0.790555	1.30621	1.14976	222.136	22.58	2	5	5	7	248	27.8376	8.45557
	P26039	Talin-1 OS	Tln1	0.938379	0.734087	0.64596	512.103	4.68	1	10	11	20	2541	269.653	6.17627
	P09813	Apolipoprotein A-II OS	Apoa2	0.727949	0.861111	0.757352	168.655	18.63	1	2	2	8	102	11.3017	7.18115
	P81117	Nucleobindin-2 OS	Nucb2	0.815239	5.81779	5.10489	348.06	26.43	1	10	10	20	420	50.2732	5.14795
	Q99JH8	ER lumen protein-retaining receptor 1 OS	Kdelr1	0.76427	3.29299	2.88946	82.84	23.11	3	3	3	5	212	24.544	8.6167
	P60229	Eukaryotic translation initiation factor 3 subunit E OS	Eif3e	0.752419	2.54871	2.22928	46.6333	5.62	1	3	3	4	445	52.1874	6.03662
	P99027	60S acidic ribosomal protein P2 OS	Rplp2	0.683632	5.78123	5.05478	431.882	48.7	1	6	6	16	115	11.6438	4.53857
	P40142	Transketolase OS	Tkt	0.629485	2.0681	1.80794	1759.65	52.65	1	28	28	85	623	67.5876	7.50342
	P47915	60S ribosomal protein L29 OS	Rpl29	0.719196	11.0657	9.67367	144.42	16.25	1	3	3	10	160	17.5759	11.8394
	P07310	Creatine kinase M-type OS	Ckm	2.03359	1.46763	1.28177	841.991	52.23	1	16	17	50	381	43.0178	7.06396
	P31230	Aminoacyl tRNA synthase complex-interacting multifunctional protein 1 OS	Aimp1	0.742057	4.57922	3.99833	86.18	9.35	1	2	2	3	310	33.9759	8.35303
	P84099	60S ribosomal protein L19 OS	Rpl19	0.727918	6.39812	5.58421	267.585	30.61	1	8	8	18	196	23.4512	11.4731
	Q8BH64	EH domain-containing protein 2 OS	Ehd2	0.600116	0.573112	0.500015	164.725	17.5	1	8	9	12	543	61.1358	6.50732
	P68254	14-3-3 protein theta OS	Ywhaq	0.649791	0.673681	0.586846	893.469	33.06	1	3	9	41	245	27.7608	4.77979
	Q01405	Protein transport protein Sec23A OS	Sec23a	0.671646	1.27573	1.11061	126.62	1.44	1	1	1	4	765	86.1064	7.07861
	Q02053	Ubiquitin-like modifier-activating enzyme 1 OS	Uba1	0.845085	1.22645	1.0676	460.67	19.28	2	18	18	31	1058	117.734	5.65576
	P62962	Profilin-1 OS	Pfn1	0.94625	1.23506	1.07492	394.295	59.29	1	7	7	17	140	14.9475	8.27979
	Q9CXW4	60S ribosomal protein L11 OS	Rpl11	0.72976	8.75962	7.61955	148.112	28.65	1	5	5	10	178	20.2396	9.59814
	O55029	Coatomer subunit beta' OS	Copb2	0.691121	3.07729	2.67614	198.725	11.82	1	10	10	14	905	102.384	5.30029
	Q9DCX2	ATP synthase subunit d, mitochondrial OS	Atp5pd	0.847747	3.73336	3.24589	84.8467	39.13	1	5	5	7	161	18.7376	5.69385
	P16125	L-lactate dehydrogenase B chain OS	Ldhb	0.595924	0.93847	0.815649	202.47	11.68	1	3	4	9	334	36.549	6.04932
	Q8VDD5	Myosin-9 OS	Myh9	0.703299	1.08008	0.938368	868.066	13.93	1	19	28	47	1960	226.232	5.65576
	Q9Z1Q9	Valine--tRNA ligase OS	Vars1	0.728592	4.12237	3.58123	581.363	19.08	1	22	22	35	1263	140.127	7.76709
	Q9CQS8	Protein transport protein Sec61 subunit beta OS	Sec61b	0.747162	8.6688	7.52201	375.993	66.67	1	5	5	15	96	9.9521	11.561
	Q922Q8	Leucine-rich repeat-containing protein 59 OS	Lrrc59	0.790342	4.21799	3.65922	252.69	25.73	1	8	8	16	307	34.8558	9.5249
	P70441	Na(+)/H(+) exchange regulatory cofactor NHE-RF1 OS	Slc9a3r1	0.856084	5.29959	4.5884	84.76	9.01	1	3	3	6	355	38.5765	5.89697
	P25444	40S ribosomal protein S2 OS	Rps2	0.700506	6.43322	5.56794	791.671	40.27	1	12	12	38	293	31.2117	10.2427
	P37040	NADPH--cytochrome P450 reductase OS	Por	0.551977	0.577056	0.499405	151.183	5.46	1	4	4	7	678	76.9953	5.52881
	O70503	Very-long-chain 3-oxoacyl-CoA reductase OS	Hsd17b12	0.707577	2.93048	2.5341	200.904	25.32	1	8	8	11	312	34.7194	9.5249
	Q9QUM9	Proteasome subunit alpha type-6 OS	Psma6	0.779952	1.46458	1.26619	134.18	17.07	1	3	3	5	246	27.3548	6.75635
	P63017	Heat shock cognate 71 kDa protein OS	Hspa8	0.815047	1.58499	1.36903	1132.61	41.8	1	22	27	57	646	70.8272	5.51611
	P63101	14-3-3 protein zeta/delta OS	Ywhaz	0.782766	1.38041	1.19157	733.21	40.41	1	5	10	40	245	27.7537	4.79248
	P14206	40S ribosomal protein SA OS	Rpsa	0.797946	5.46388	4.71465	559.68	38.64	1	8	8	20	295	32.8174	4.86865
	P62245	40S ribosomal protein S15a OS	Rps15a	0.696133	5.69005	4.90578	258.607	36.15	1	5	5	15	130	14.83	10.1255
	P70296	Phosphatidylethanolamine-binding protein 1 OS	Pebp1	0.740421	1.25154	1.07901	209.995	18.72	1	3	3	9	187	20.8173	5.40186
	Q62261	Spectrin beta chain, non-erythrocytic 1 OS	Sptbn1	0.654326	0.798749	0.687695	39.25	0.3	1	1	1	3	2363	274.052	5.57959
	Q8BH61	Coagulation factor XIII A chain OS	F13a1	0.684754	0.226473	0.194942	122.21	1.23	1	1	1	4	732	83.1547	5.92236
	Q99MN1	Lysine--tRNA ligase OS	Kars1	0.783217	3.63483	3.12393	117.981	6.89	1	4	4	7	595	67.7965	5.93506
	Q61233	Plastin-2 OS	Lcp1	1.24028	0.861416	0.739374	329.907	11.32	3	8	8	17	627	70.1048	5.32568
	Q93092	Transaldolase OS	Taldo1	0.727022	1.73732	1.49022	656.081	40.95	1	17	17	44	337	37.3634	7.03467
	O54734	Dolichyl-diphosphooligosaccharide--protein glycosyltransferase 48 kDa subunit OS	Ddost	0.690306	3.36419	2.8852	169.845	8.62	1	4	4	8	441	48.997	5.8335
	P35979	60S ribosomal protein L12 OS	Rpl12	0.688365	6.24274	5.35167	464.686	63.64	1	9	9	20	165	17.7935	9.42236
	Q61554	Fibrillin-1 OS	Fbn1	0.574593	0.230208	0.197107	87.84	0.7	1	2	2	4	2873	312.083	4.91943
	Q9D1M7	Peptidyl-prolyl cis-trans isomerase FKBP11 OS	Fkbp11	0.800895	7.00539	5.9941	476.569	48.76	1	7	7	28	201	22.1232	9.36377
	Q9D6R2	Isocitrate dehydrogenase [NAD] subunit alpha, mitochondrial OS	Idh3a	0.717429	0.795415	0.68019	197.605	23.22	1	6	6	8	366	39.6131	6.72705
	P17742	Peptidyl-prolyl cis-trans isomerase A OS	Ppia	0.792545	1.78662	1.52717	509.724	53.66	1	9	9	26	164	17.9599	7.89893
	Q8BMJ2	Leucine--tRNA ligase, cytoplasmic OS	Lars1	0.91723	4.04378	3.45417	42.4	1.7	1	2	2	3	1178	134.106	7.04932
	Q62418	Drebrin-like protein OS	Dbnl	1.13378	1.80901	1.54398	75.2667	2.52	1	1	1	3	436	48.6696	4.91943
	Q05816	Fatty acid-binding protein 5 OS	Fabp5	0.96756	1.36937	1.16803	493.149	57.04	1	7	7	19	135	15.1274	6.53662
	P22599	Alpha-1-antitrypsin 1-2 OS	Serpina1b	0.604741	0.529098	0.451202	332.083	17.19	4	3	8	22	413	45.9455	5.5415
	Q8VDN2	Sodium/potassium-transporting ATPase subunit alpha-1 OS	Atp1a1	0.748383	1.29477	1.10283	190.497	5.67	6	6	6	12	1023	112.91	5.45264
	O35678	Monoglyceride lipase OS	Mgll	0.742286	0.400364	0.340652	142.407	15.84	1	3	3	6	303	33.366	7.15186
	P62301	40S ribosomal protein S13 OS	Rps13	0.70698	5.80078	4.93527	464.65	45.03	1	8	8	26	151	17.2117	10.5356
	Q62426	Cystatin-B OS	Cstb	0.713236	1.29996	1.10589	100.75	32.65	1	2	2	4	98	11.0385	7.38623
	P05201	Aspartate aminotransferase, cytoplasmic OS	Got1	0.832316	5.98276	5.08925	332.503	30.75	1	11	11	19	413	46.2185	7.13721
	P62855	40S ribosomal protein S26 OS	Rps26	0.705368	5.47504	4.65711	166.228	56.52	1	6	6	13	115	13.0071	11.0044
	P62264	40S ribosomal protein S14 OS	Rps14	0.741265	8.27895	7.04208	228.865	37.75	1	5	5	12	151	16.2625	10.0522
	P62754	40S ribosomal protein S6 OS	Rps6	0.779522	9.58719	8.14589	554.37	32.53	1	9	9	35	249	28.663	10.8433
	P58774	Tropomyosin beta chain OS	Tpm2	0.464405	3.17422	2.69622	695.584	27.11	2	4	11	37	284	32.8166	4.70361
	Q9JMA1	Ubiquitin carboxyl-terminal hydrolase 14 OS	Usp14	0.790334	1.72038	1.46079	149.97	3.45	1	2	2	5	493	55.966	5.23682
	P45878	Peptidyl-prolyl cis-trans isomerase FKBP2 OS	Fkbp2	0.723713	2.87001	2.43596	42.0067	14.29	1	2	2	3	140	15.3342	8.88037
	Q9R0Q7	Prostaglandin E synthase 3 OS	Ptges3	0.800034	1.74179	1.47783	38.86	29.38	1	4	4	6	160	18.7094	4.55127
	Q8BHD7	Polypyrimidine tract-binding protein 3 OS	Ptbp3	0.900692	1.93715	1.64228	81.848	4.59	4	3	3	5	523	56.6653	9.12939
	P62082	40S ribosomal protein S7 OS	Rps7	0.790941	5.7656	4.88579	228.872	34.54	1	6	6	16	194	22.1133	10.0962
	Q9R1P0	Proteasome subunit alpha type-4 OS	Psma4	0.828651	1.34844	1.1417	103.987	13.41	1	4	4	6	261	29.4522	7.72314
	P62259	14-3-3 protein epsilon OS	Ywhae	0.745692	1.25247	1.05987	647.362	45.88	1	8	11	36	255	29.1554	4.7417
	O08529	Calpain-2 catalytic subunit OS	Capn2	0.631942	0.363945	0.30773	140.62	4	1	3	3	4	700	79.8218	4.95752
	P70349	Histidine triad nucleotide-binding protein 1 OS	Hint1	0.842425	1.68778	1.42709	145.536	38.89	1	4	4	7	126	13.7681	6.87354
	Q8BFR5	Elongation factor Tu, mitochondrial OS	Tufm	0.797123	2.5511	2.15602	296.449	23.01	1	9	9	14	452	49.477	7.56201
	P61750	ADP-ribosylation factor 4 OS	Arf4	0.729781	2.58135	2.17942	287.12	27.22	1	2	4	10	180	20.3836	7.13721
	P59999	Actin-related protein 2/3 complex subunit 4 OS	Arpc4	1.00912	3.03126	2.55859	70.72	16.07	1	3	3	5	168	19.6543	8.42627
	P63323	40S ribosomal protein S12 OS	Rps12	0.732774	4.56766	3.85197	350.675	43.18	1	6	6	21	132	14.5156	7.23975
	P50247	Adenosylhomocysteinase OS	Ahcy	0.804627	1.24635	1.05059	72.1767	3.94	1	2	2	3	432	47.6573	6.53662
	O08585	Clathrin light chain A OS	Clta	0.781982	1.98401	1.67173	138.859	20	2	6	6	11	235	25.5885	4.57666
	Q60865	Caprin-1 OS	Caprin1	0.722861	2.09505	1.7631	35.4465	0.99	1	1	1	4	707	78.1208	5.24951
	Q9CWJ9	Bifunctional purine biosynthesis protein ATIC OS	Atic	0.741928	1.4774	1.2406	93.9588	4.56	1	3	3	3	592	64.1771	6.75635
	P61089	Ubiquitin-conjugating enzyme E2 N OS	Ube2n	0.748347	1.36824	1.14854	210.938	31.58	1	4	4	9	152	17.127	6.56592
	P61222	ATP-binding cassette sub-family E member 1 OS	Abce1	0.667839	4.43562	3.72333	139.344	11.02	1	6	6	10	599	67.271	8.33838
	Q9CZX8	40S ribosomal protein S19 OS	Rps19	0.713563	7.86153	6.59746	530.517	48.28	1	9	9	22	145	16.0756	10.4038
	Q6ZWX6	Eukaryotic translation initiation factor 2 subunit 1 OS	Eif2s1	0.664966	4.20149	3.52563	333.584	19.37	1	6	6	13	315	36.0854	5.08447
	Q9DBG6	Dolichyl-diphosphooligosaccharide--protein glycosyltransferase subunit 2 OS	Rpn2	0.68556	3.08293	2.58643	181.055	9.19	1	5	5	8	631	69.02	5.80811
	P55264	Adenosine kinase OS	Adk	0.772131	1.21527	1.01917	105.41	9.14	1	4	4	5	361	40.1235	6.21436
	Q80WJ7	Protein LYRIC OS	Mtdh	0.756758	6.65167	5.57771	79.26	1.9	1	1	1	3	579	63.8077	9.33447
	P62908	40S ribosomal protein S3 OS	Rps3	0.744195	6.19697	5.19456	934.382	64.61	1	16	16	51	243	26.6574	9.65674
	Q9CY58	Plasminogen activator inhibitor 1 RNA-binding protein OS	Serbp1	0.85063	3.23353	2.71022	141.793	8.35	1	3	3	6	407	44.6873	8.54346
	P54728	UV excision repair protein RAD23 homolog B OS	Rad23b	0.740713	1.38678	1.1623	111.394	6.01	2	3	3	5	416	43.4858	4.83057
	Q8BP92	Reticulocalbin-2 OS	Rcn2	0.696541	1.64961	1.38028	51.97	7.5	1	2	2	3	320	37.2478	4.42432
	P99029	Peroxiredoxin-5, mitochondrial OS	Prdx5	0.753779	0.931107	0.778901	228.723	40.48	1	8	8	14	210	21.8835	8.85107
	P35700	Peroxiredoxin-1 OS	Prdx1	0.983081	1.87517	1.56788	540.472	49.75	1	8	10	32	199	22.1624	8.11865
	Q8BHN3	Neutral alpha-glucosidase AB OS	Ganab	0.720099	0.967636	0.809041	85.76	4.66	1	5	5	10	944	106.844	6.06201
	P63276	40S ribosomal protein S17 OS	Rps17	0.717125	6.60737	5.52211	176.207	22.96	1	4	4	12	135	15.5144	9.84717
	Q9JHU4	Cytoplasmic dynein 1 heavy chain 1 OS	Dync1h1	0.64182	2.15299	1.79622	351.363	2	1	11	11	20	4644	531.71	6.41748
	P11404	Fatty acid-binding protein, heart OS	Fabp3	0.721022	5.43949	4.53796	3505.76	53.38	1	7	7	232	133	14.8097	6.56592
	P12970	60S ribosomal protein L7a OS	Rpl7a	0.785191	5.73467	4.78113	616.673	56.39	1	17	17	40	266	29.958	10.5649
	Q8CIE6	Coatomer subunit alpha OS	Copa	0.718832	3.6379	3.03227	660.784	16.58	1	22	22	41	1224	138.344	7.6499
	Q91VR5	ATP-dependent RNA helicase DDX1 OS	Ddx1	0.692946	2.19763	1.83035	151.185	8.92	1	6	6	8	740	82.4478	7.21045
	Q8BMP6	Golgi resident protein GCP60 OS	Acbd3	0.74203	2.03707	1.69637	187.333	4.38	1	2	2	6	525	60.1438	5.10986
	Q9Z0N1	Eukaryotic translation initiation factor 2 subunit 3, X-linked OS	Eif2s3x	0.648364	3.87135	3.22276	153.002	16.1	2	8	8	10	472	51.0332	8.39697
	P24527	Leukotriene A-4 hydrolase OS	Lta4h	0.794307	0.95921	0.79844	94.12	6.22	1	3	3	4	611	69.0071	6.41748
	P61027	Ras-related protein Rab-10 OS	Rab10	0.677725	1.07322	0.893255	261.787	33.5	17	5	7	12	200	22.5266	8.38232
	Q9CY50	Translocon-associated protein subunit alpha OS	Ssr1	0.656721	14.1853	11.8048	222.913	23.43	1	4	4	7	286	32.0451	4.44971
	P14576	Signal recognition particle 54 kDa protein OS	Srp54	0.717217	7.3146	6.08211	150.511	5.56	1	3	3	7	504	55.6843	8.74854
	P11352	Glutathione peroxidase 1 OS	Gpx1	0.897463	1.74546	1.45071	113.626	27.36	1	5	5	9	201	22.3162	7.21045
	Q99KF1	Transmembrane emp24 domain-containing protein 9 OS	Tmed9	0.71304	2.90086	2.41026	45.2033	7.23	1	2	2	3	235	27.1101	8.41162
	P62274	40S ribosomal protein S29 OS	Rps29	0.490091	2.0396	1.69306	77.49	32.14	1	2	2	5	56	6.6723	10.1255
	Q91V04	Translocating chain-associated membrane protein 1 OS	Tram1	0.583845	2.72493	2.26049	90.23	6.15	1	2	2	6	374	43.0118	9.68604
	O55022	Membrane-associated progesterone receptor component 1 OS	Pgrmc1	0.794294	1.06489	0.883309	94.63	14.87	2	2	2	5	195	21.6808	4.70361
	P80316	T-complex protein 1 subunit epsilon OS	Cct5	0.821016	1.47121	1.2202	47.09	7.58	1	4	4	5	541	59.5859	6.02393
	Q9DBP5	UMP-CMP kinase OS	Cmpk1	0.73052	2.20536	1.82785	162.114	21.43	1	4	4	7	196	22.1513	5.8335
	Q62351	Transferrin receptor protein 1 OS	Tfrc	0.777671	7.91361	6.55825	182.256	12.45	1	11	11	17	763	85.6773	6.56592
	Q91VR2	ATP synthase subunit gamma, mitochondrial OS	Atp5f1c	0.749672	2.51072	2.07843	255.731	16.44	1	5	5	13	298	32.8651	9.01221
	Q6PDN3	Myosin light chain kinase, smooth muscle OS	Mylk	1.24698	2.78711	2.30497	73.37	1.08	1	2	2	4	1941	212.792	6.25244
	P62858	40S ribosomal protein S28 OS	Rps28	0.690224	6.42742	5.31441	198.71	46.38	1	3	3	8	69	7.8362	10.6968
	P04117	Fatty acid-binding protein, adipocyte OS	Fabp4	0.632137	0.387894	0.320689	2776.07	65.15	3	8	8	246	132	14.6405	8.39697
	Q78IK2	ATP synthase membrane subunit DAPIT, mitochondrial OS	Atp5md	0.584539	2.1774	1.79683	109.147	43.1	1	2	2	3	58	6.37736	9.83252
	Q6ZWU9	40S ribosomal protein S27 OS	Rps27	0.759001	6.85893	5.65987	56.33	25	2	2	2	4	84	9.45484	9.45166
	P30115	Glutathione S-transferase A3 OS	Gsta3	0.570384	0.448725	0.370184	119.125	22.62	3	6	6	8	221	25.3443	8.73389
	Q9CPT4	Myeloid-derived growth factor OS	Mydgf	0.708424	3.02914	2.4985	35.55	12.05	1	2	2	4	166	17.971	6.78564
	P62267	40S ribosomal protein S23 OS	Rps23	0.708387	8.32723	6.8683	287.348	30.07	1	6	6	13	143	15.7977	10.4917
	P62983	Ubiquitin-40S ribosomal protein S27a OS	Rps27a	0.630895	1.08936	0.895677	157.65	42.31	3	2	5	10	156	17.9395	9.64209
	P11983	T-complex protein 1 subunit alpha OS	Tcp1	0.835122	2.11214	1.73602	77.47	7.91	1	4	4	5	556	60.4107	6.16357
	P67984	60S ribosomal protein L22 OS	Rpl22	0.649699	11.18	9.18816	155.9	18.75	1	2	2	4	128	14.7498	9.18799
	Q9R0P5	Destrin OS	Dstn	0.759837	1.4053	1.15453	104.453	21.21	1	3	4	7	165	18.5095	7.97217
	Q9WVP1	AP-1 complex subunit mu-2 OS	Ap1m2	0.819398	3.87401	3.18255	109.208	5.67	2	3	3	5	423	48.1061	7.54736
	P61161	Actin-related protein 2 OS	Actr2	0.930055	3.05624	2.50994	36.08	1.78	1	1	1	3	394	44.7322	6.7417
	Q9R0Q3	Transmembrane emp24 domain-containing protein 2 OS	Tmed2	0.796115	2.6359	2.16444	177.26	20.9	1	4	4	10	201	22.6903	5.17334
	P63028	Translationally-controlled tumor protein OS	Tpt1	0.933262	4.56194	3.74561	181.737	27.91	1	4	4	7	172	19.4496	4.85596
	P14148	60S ribosomal protein L7 OS	Rpl7	0.702077	6.76496	5.55353	486.694	49.26	1	15	15	38	270	31.3998	10.8872
	Q9JHI5	Isovaleryl-CoA dehydrogenase, mitochondrial OS	Ivd	0.883203	1.15862	0.951003	294.067	18.63	1	7	7	12	424	46.2959	8.29443
	Q61599	Rho GDP-dissociation inhibitor 2 OS	Arhgdib	0.882972	0.348433	0.28568	24.7567	8	1	2	2	5	200	22.8365	5.10986
	Q9Z0F7	Gamma-synuclein OS	Sncg	0.420217	0.0801305	0.0656978	112.23	30.89	2	3	3	4	123	13.1516	4.65283
	P17563	Methanethiol oxidase OS	Selenbp1	0.656777	0.657838	0.539167	83.1487	11.65	2	5	5	8	472	52.4804	6.29053
	P19783	Cytochrome c oxidase subunit 4 isoform 1, mitochondrial OS	Cox4i1	0.678671	3.64156	2.98373	91.8167	18.93	1	3	3	7	169	19.5179	9.23193
	P21550	Beta-enolase OS	Eno3	1.49151	1.28667	1.05354	742.809	22.12	1	8	10	25	434	46.9953	7.18115
	Q01768	Nucleoside diphosphate kinase B OS	Nme2	0.884938	3.73836	3.06044	521.123	51.32	1	3	7	40	152	17.3519	7.50342
	P62843	40S ribosomal protein S15 OS	Rps15	0.751049	6.02196	4.92857	77.36	22.76	1	4	4	8	145	17.0292	10.3892
	P49722	Proteasome subunit alpha type-2 OS	Psma2	0.783737	1.15198	0.942038	62.69	12.39	1	2	2	4	234	25.9103	7.43018
	Q8BRF7	Sec1 family domain-containing protein 1 OS	Scfd1	0.722987	3.29575	2.69375	85.3	1.41	1	1	1	3	639	72.2771	6.37939
	Q5XJY5	Coatomer subunit delta OS	Arcn1	0.740551	4.39813	3.5929	474.586	27.4	1	11	11	19	511	57.1932	6.21436
	Q923D2	Flavin reductase (NADPH) OS	Blvrb	0.830456	0.641836	0.523923	42.72	8.25	1	2	2	3	206	22.1834	7.00537
	Q61598	Rab GDP dissociation inhibitor beta OS	Gdi2	0.806724	1.69746	1.3851	290.647	33.48	1	13	13	20	445	50.5047	6.25244
	O08553	Dihydropyrimidinase-related protein 2 OS	Dpysl2	0.732595	0.466755	0.380821	157.45	8.57	1	5	5	8	572	62.2386	6.37939
	P06151	L-lactate dehydrogenase A chain OS	Ldha	0.706716	1.84154	1.50106	767.79	41.27	2	14	15	44	332	36.4752	7.73779
	Q9Z1Z0	General vesicular transport factor p115 OS	Uso1	0.916991	2.40654	1.96115	57.9833	4.07	1	3	3	3	959	106.917	4.93213
	Q61316	Heat shock 70 kDa protein 4 OS	Hspa4	0.80406	1.29276	1.05269	105.642	7.37	1	6	6	6	841	94.0733	5.23682
	Q8K0C9	GDP-mannose 4,6 dehydratase OS	Gmds	0.892011	3.70275	3.01444	64.1	4.3	1	2	2	5	372	41.9582	7.03467
	Q64433	10 kDa heat shock protein, mitochondrial OS	Hspe1	0.973815	2.63506	2.1439	297.324	60.78	1	7	7	17	102	10.9559	8.35303
	P62911	60S ribosomal protein L32 OS	Rpl32	0.568545	7.40651	6.02551	101.17	14.81	1	2	2	5	135	15.8498	11.3267
	Q922R8	Protein disulfide-isomerase A6 OS	Pdia6	0.849287	2.72017	2.21283	459.745	15.68	1	6	6	18	440	48.0703	5.13525
	Q61171	Peroxiredoxin-2 OS	Prdx2	0.93285	1.51047	1.22808	423.851	39.39	1	8	8	18	198	21.7651	5.41455
	Q3UPL0	Protein transport protein Sec31A OS	Sec31a	0.698934	2.93856	2.3884	476.814	8.13	1	11	11	26	1230	133.486	6.75635
	P14869	60S acidic ribosomal protein P0 OS	Rplp0	0.704434	9.47864	7.70338	509.52	34.07	1	9	9	21	317	34.1948	6.25244
	P97461	40S ribosomal protein S5 OS	Rps5	0.776275	5.85587	4.75889	189.585	24.02	1	7	7	15	204	22.875	9.71533
	Q9Z127	Large neutral amino acids transporter small subunit 1 OS	Slc7a5	0.840007	5.14824	4.18277	211.66	3.13	1	2	2	8	512	55.8355	7.89893
	P42125	Enoyl-CoA delta isomerase 1, mitochondrial OS	Eci1	0.79385	0.799535	0.649498	102.879	13.84	1	3	3	4	289	32.2298	8.98291
	Q62186	Translocon-associated protein subunit delta OS	Ssr4	0.762301	3.72364	3.02373	138.17	25.58	1	4	4	7	172	18.9245	5.78271
	Q9CQZ5	NADH dehydrogenase [ubiquinone] 1 alpha subcomplex subunit 6 OS	Ndufa6	0.566135	1.70787	1.38662	108.084	19.08	1	2	2	3	131	15.273	10.1108
	P84091	AP-2 complex subunit mu OS	Ap2m1	0.820391	1.83665	1.49098	87.04	9.43	1	5	5	6	435	49.623	9.53955
	P58771	Tropomyosin alpha-1 chain OS	Tpm1	0.506332	2.88363	2.34085	699.366	34.15	2	4	14	40	284	32.6607	4.7417
	P14115	60S ribosomal protein L27a OS	Rpl27a	0.725629	6.72869	5.45721	456.771	41.22	1	7	7	23	148	16.595	11.1216
	P00920	Carbonic anhydrase 2 OS	Ca2	1.24123	1.50097	1.21726	233.72	31.92	1	6	6	10	260	29.0145	7.00537
	Q8K3K7	1-acyl-sn-glycerol-3-phosphate acyltransferase beta OS	Agpat2	0.59486	0.161896	0.131067	73.24	14.39	1	3	3	4	278	30.9902	8.88037
	Q91W43	Glycine dehydrogenase (decarboxylating), mitochondrial OS	Gldc	1.29042	2.64824	2.14325	65.6133	0.98	1	1	1	3	1025	113.195	7.56201
	P62852	40S ribosomal protein S25 OS	Rps25	0.839464	10.5845	8.56311	120.413	20.8	1	3	3	7	125	13.7337	10.1108
	Q6ZQ38	Cullin-associated NEDD8-dissociated protein 1 OS	Cand1	0.634798	0.807936	0.653515	135.615	1.71	1	2	2	4	1230	136.245	5.78271
	Q99PL5	Ribosome-binding protein 1 OS	Rrbp1	0.712794	4.3283	3.49824	986.314	23.3	1	25	25	48	1605	172.776	9.33447
	Q9D662	Protein transport protein Sec23B OS	Sec23b	0.813269	7.7342	6.24991	138.865	8.08	1	5	5	8	767	86.3815	6.96143
	O55142	60S ribosomal protein L35a OS	Rpl35a	0.713807	4.99236	4.03274	240.657	33.64	1	5	5	15	110	12.5457	10.8872
	Q8QZY1	Eukaryotic translation initiation factor 3 subunit L OS	Eif3l	0.831619	1.94538	1.57066	61.47	5.5	1	4	4	6	564	66.5703	6.44287
	P0DP26	Calmodulin-1 OS	Calm1	0.76261	0.771631	0.622777	189.565	28.19	2	5	5	8	149	16.8268	4.22119
	Q68FL6	Methionine--tRNA ligase, cytoplasmic OS	Mars1	0.694421	6.84175	5.51854	62.58	2	1	2	2	3	902	101.366	7.13721
	P60843	Eukaryotic initiation factor 4A-I OS	Eif4a1	0.681995	3.45214	2.78326	514.67	37.68	2	4	14	25	406	46.1246	5.47803
	P61982	14-3-3 protein gamma OS	Ywhag	0.585866	0.28778	0.231911	605.463	34.41	1	3	9	34	247	28.2849	4.89404
	P47754	F-actin-capping protein subunit alpha-2 OS	Capza2	0.919819	1.57812	1.27108	139.61	24.83	2	5	5	6	286	32.9466	5.84619
	P05064	Fructose-bisphosphate aldolase A OS	Aldoa	0.777865	1.08194	0.871425	641.181	34.34	2	12	14	27	364	39.3313	8.08936
	P60766	Cell division control protein 42 homolog OS	Cdc42	0.787967	0.80731	0.650058	135.265	31.41	4	4	5	9	191	21.245	6.55127
	O70435	Proteasome subunit alpha type-3 OS	Psma3	0.860544	1.59792	1.28633	49.13	17.25	1	5	5	6	255	28.3871	5.43994
	O09167	60S ribosomal protein L21 OS	Rpl21	0.637103	7.35695	5.91548	277.05	30.63	1	5	5	12	160	18.5501	10.4917
	Q9D710	Thioredoxin-related transmembrane protein 2 OS	Tmx2	0.59966	1.55576	1.25014	63.0145	2.71	1	1	1	4	295	33.9206	8.74854
	P62743	AP-2 complex subunit sigma OS	Ap2s1	0.674137	1.11858	0.898564	22.37	10.56	1	2	2	4	142	17.0067	6.17627
	P63242	Eukaryotic translation initiation factor 5A-1 OS	Eif5a	0.81355	4.46618	3.58767	251.727	25.32	2	5	5	16	154	16.8214	5.23682
	P16045	Galectin-1 OS	Lgals1	0.541774	0.18191	0.146098	531.075	37.78	1	5	5	26	135	14.8562	5.49072
	Q8CGC7	Bifunctional glutamate/proline--tRNA ligase OS	Eprs1	0.695258	3.42528	2.75071	216.567	9.39	1	12	12	16	1512	169.972	7.66455
	P00405	Cytochrome c oxidase subunit 2 OS	Mtco2	0.581431	3.58718	2.88008	93.6367	16.3	1	3	3	6	227	25.959	4.729
	Q6ZWV3	60S ribosomal protein L10 OS	Rpl10	0.632232	5.1697	4.14939	254.453	28.97	2	6	6	17	214	24.5879	10.0815
	Q8CGN5	Perilipin-1 OS	Plin1	0.509663	0.13954	0.111945	509.426	23.6	1	9	9	19	517	55.5614	7.00537
	Q9D1D4	Transmembrane emp24 domain-containing protein 10 OS	Tmed10	0.783213	3.91264	3.13681	74.1433	15.07	1	3	3	7	219	24.8949	6.69775
	P08074	Carbonyl reductase [NADPH] 2 OS	Cbr2	1.01125	0.793407	0.635298	103.63	6.15	2	2	2	4	244	25.9416	9.01221
	P06745	Glucose-6-phosphate isomerase OS	Gpi	0.755858	1.00297	0.801983	194.593	8.24	1	5	5	12	558	62.7272	8.1333
	Q9WTX5	S-phase kinase-associated protein 1 OS	Skp1	0.688042	0.911427	0.728615	118.38	20.86	1	3	3	5	163	18.6603	4.53857
	Q8CAY6	Acetyl-CoA acetyltransferase, cytosolic OS	Acat2	0.690786	1.84032	1.47113	277.132	15.62	1	5	5	11	397	41.2712	7.50342
	P62751	60S ribosomal protein L23a OS	Rpl23a	0.631902	6.14344	4.91044	306.749	38.46	1	9	9	20	156	17.6841	10.4478
	Q91V61	Sideroflexin-3 OS	Sfxn3	0.561533	2.05981	1.64535	64.8433	9.35	1	3	3	3	321	35.3835	9.51025
	Q9ERK4	Exportin-2 OS	Cse1l	0.662302	0.794668	0.63375	109.54	1.85	1	2	2	4	971	110.384	5.77002
	Q8VBT6	Apolipoprotein B receptor OS	Apobr	0.790651	3.04952	2.43156	80.81	2.97	1	2	2	3	942	102.643	4.36084
	P60867	40S ribosomal protein S20 OS	Rps20	0.757948	3.56619	2.84346	160.951	25.21	1	3	3	10	119	13.3643	9.93506
	Q9CQC9	GTP-binding protein SAR1b OS	Sar1b	0.810419	1.94192	1.54835	121.153	15.15	1	2	3	6	198	22.3675	6.11279
	P27773	Protein disulfide-isomerase A3 OS	Pdia3	0.887655	1.79495	1.43078	701.615	41.78	1	19	19	42	505	56.6427	6.21436
	Q3UGC7	Eukaryotic translation initiation factor 3 subunit J-A OS	Eif3j1	0.75037	4.45943	3.55358	42.6433	10.73	2	3	3	3	261	29.3256	4.80518
	P70404	Isocitrate dehydrogenase [NAD] subunit gamma 1, mitochondrial OS	Idh3g	0.676508	0.93801	0.747377	49.58	6.62	1	3	3	4	393	42.7582	9.01221
	O09061	Proteasome subunit beta type-1 OS	Psmb1	0.815343	1.49234	1.18891	54.33	8.75	1	2	2	3	240	26.3553	7.81104
	Q8CDN6	Thioredoxin-like protein 1 OS	Txnl1	0.758829	1.77452	1.41316	52.52	5.54	1	2	2	4	289	32.2167	4.95752
	Q9Z2U1	Proteasome subunit alpha type-5 OS	Psma5	0.887783	1.5287	1.21709	48.0167	12.03	1	3	3	3	241	26.3942	4.79248
	P19157	Glutathione S-transferase P 1 OS	Gstp1	0.73804	0.882006	0.702169	196.73	20.48	2	3	3	6	210	23.5941	7.86963
	Q6ZWV7	60S ribosomal protein L35 OS	Rpl35	0.655731	8.73361	6.95109	239.811	18.7	1	3	3	10	123	14.5436	11.0483
	Q91YT0	NADH dehydrogenase [ubiquinone] flavoprotein 1, mitochondrial OS	Ndufv1	0.641724	2.77862	2.21096	53.2533	3.88	1	2	2	3	464	50.8017	8.20654
	Q9CZ30	Obg-like ATPase 1 OS	Ola1	0.705629	2.30595	1.83369	91.3763	15.66	1	5	5	6	396	44.7013	7.81104
	Q64010	Adapter molecule crk OS	Crk	0.742269	1.73589	1.38036	95.32	2.63	1	1	1	4	304	33.794	5.5542
	P62242	40S ribosomal protein S8 OS	Rps8	0.716531	5.57504	4.4325	567.787	39.9	1	7	7	23	208	24.1902	10.3159
	Q76MZ3	Serine/threonine-protein phosphatase 2A 65 kDa regulatory subunit A alpha isoform OS	Ppp2r1a	0.698587	0.734124	0.583416	80.5755	3.74	2	3	3	9	589	65.2809	5.10986
	P97351	40S ribosomal protein S3a OS	Rps3a	0.808373	5.49293	4.36472	485.46	49.24	1	14	14	34	264	29.8657	9.72998
	P62281	40S ribosomal protein S11 OS	Rps11	0.716829	5.6542	4.49218	219.894	37.97	1	7	7	16	158	18.419	10.3013
	Q9DB20	ATP synthase subunit O, mitochondrial OS	Atp5po	0.648563	2.16997	1.72345	215.427	33.8	1	7	7	18	213	23.3487	9.99365
	Q9QZD8	Mitochondrial dicarboxylate carrier OS	Slc25a10	0.579448	1.51696	1.20388	73.59	12.89	1	4	4	5	287	31.6941	9.31982
	Q9JIF7	Coatomer subunit beta OS	Copb1	0.77484	4.57027	3.62652	358.818	15.74	1	13	13	29	953	106.998	5.99854
	Q99LD4	COP9 signalosome complex subunit 1 OS	Gps1	0.686715	1.40144	1.11192	89.2	2.34	1	1	1	4	471	53.4081	6.84424
	P08003	Protein disulfide-isomerase A4 OS	Pdia4	0.796524	1.54981	1.22916	267.582	14.42	1	8	8	14	638	71.9375	5.31299
	P29341	Polyadenylate-binding protein 1 OS	Pabpc1	0.800883	4.90369	3.8876	479.208	18.08	1	10	10	20	636	70.6259	9.49561
	P56391	Cytochrome c oxidase subunit 6B1 OS	Cox6b1	0.595488	3.0117	2.38726	129.71	61.63	1	5	5	10	86	10.0649	8.71924
	P09411	Phosphoglycerate kinase 1 OS	Pgk1	0.846224	2.37921	1.88433	386.879	32.61	2	13	13	25	417	44.522	7.89893
	P13707	Glycerol-3-phosphate dehydrogenase [NAD(+)], cytoplasmic OS	Gpd1	0.606745	0.67275	0.53261	912.114	49.86	1	19	21	52	349	37.5484	7.1665
	O35887	Calumenin OS	Calu	0.633151	1.61908	1.28047	121.6	32.38	1	7	7	8	315	37.0405	4.66553
	P17182	Alpha-enolase OS	Eno1	0.672177	1.67608	1.32511	1515.33	50	2	15	17	51	434	47.1112	6.80029
	Q62448	Eukaryotic translation initiation factor 4 gamma 2 OS	Eif4g2	0.660852	3.12054	2.46709	98.6433	1.32	1	1	1	3	906	102.041	7.13721
	Q9D8X2	Coiled-coil domain-containing protein 124 OS	Ccdc124	0.706732	4.93589	3.90152	74.24	3.69	1	1	1	4	217	25.3304	9.64209
	Q6ZWN5	40S ribosomal protein S9 OS	Rps9	0.751164	6.23297	4.92574	357.488	56.7	1	14	14	34	194	22.5776	10.6528
	O08709	Peroxiredoxin-6 OS	Prdx6	0.631331	0.805142	0.636199	233.907	37.95	1	7	7	14	224	24.855	6.01123
	Q9JKR6	Hypoxia up-regulated protein 1 OS	Hyou1	0.846073	2.71821	2.14746	81.8345	3.9	1	5	5	8	999	111.112	5.18604
	P58252	Elongation factor 2 OS	Eef2	0.786209	5.68849	4.49292	1896.47	50.7	2	38	38	108	858	95.2529	6.82959
	Q9CQQ7	ATP synthase F(0) complex subunit B1, mitochondrial OS	Atp5pb	0.686726	2.84598	2.24731	220.706	19.14	1	7	7	14	256	28.9304	9.05615
	Q99MN9	Propionyl-CoA carboxylase beta chain, mitochondrial OS	Pccb	0.757819	1.39309	1.09943	81.4667	7.39	1	3	3	3	541	58.3719	7.66455
	P61620	Protein transport protein Sec61 subunit alpha isoform 1 OS	Sec61a1	0.771715	7.00662	5.5263	197.34	13.66	2	6	6	10	476	52.2305	8.06006
	P56480	ATP synthase subunit beta, mitochondrial OS	Atp5f1b	0.691103	2.60361	2.05151	1244.23	47.07	1	18	18	47	529	56.2655	5.33838
	P42932	T-complex protein 1 subunit theta OS	Cct8	0.74827	1.6593	1.30653	100.85	3.47	1	2	2	4	548	59.5175	5.61768
	Q9CQ60	6-phosphogluconolactonase OS	Pgls	0.692293	1.58082	1.24467	73.7767	12.45	1	3	3	7	257	27.2374	5.84619
	P63087	Serine/threonine-protein phosphatase PP1-gamma catalytic subunit OS	Ppp1cc	0.86793	1.07483	0.846092	83.53	3.1	3	1	1	4	323	36.9597	6.53662
	Q9DCD0	6-phosphogluconate dehydrogenase, decarboxylating OS	Pgd	0.667477	1.91196	1.50488	940.341	36.44	1	15	15	38	483	53.2131	7.2251
	P19253	60S ribosomal protein L13a OS	Rpl13a	0.724891	8.28709	6.52152	394.628	40.89	1	10	10	21	203	23.4493	11.019
	Q99L47	Hsc70-interacting protein OS	St13	0.738178	1.15091	0.905163	115.99	16.98	1	6	6	6	371	41.6295	5.26221
	P35564	Calnexin OS	Canx	0.790492	1.44229	1.13418	376.08	23.86	1	12	12	19	591	67.2357	4.64014
	Q9DBF1	Alpha-aminoadipic semialdehyde dehydrogenase OS	Aldh7a1	0.767015	3.13184	2.46225	175.747	12.99	1	6	6	9	539	58.8243	7.47412
	Q9DB05	Alpha-soluble NSF attachment protein OS	Napa	0.641779	1.1495	0.902654	172.58	3.39	1	1	1	4	295	33.1682	5.45264
	P61514	60S ribosomal protein L37a OS	Rpl37a	0.680208	10.8891	8.54924	171.039	48.91	1	4	4	8	92	10.2685	10.4331
	Q9EQH3	Vacuolar protein sorting-associated protein 35 OS	Vps35	0.689059	1.23997	0.973473	152.668	11.06	1	9	9	9	796	91.6548	5.43994
	Q8R1B4	Eukaryotic translation initiation factor 3 subunit C OS	Eif3c	0.755089	2.69565	2.11514	342.92	8.45	1	8	8	17	911	105.465	5.78271
	Q9JLJ2	4-trimethylaminobutyraldehyde dehydrogenase OS	Aldh9a1	0.735831	1.80524	1.41394	125.382	17.81	1	7	7	12	494	53.4801	6.97607
	O89079	Coatomer subunit epsilon OS	Cope	0.776881	4.30377	3.36842	108.04	11.36	1	3	3	5	308	34.5454	5.05908
	P61255	60S ribosomal protein L26 OS	Rpl26	0.701995	8.81555	6.89843	225.123	24.14	1	6	6	16	145	17.2475	10.5503
	O70251	Elongation factor 1-beta OS	Eef1b	0.651247	6.16458	4.82257	286.822	42.22	1	7	7	14	225	24.6782	4.69092
	P10126	Elongation factor 1-alpha 1 OS	Eef1a1	0.684677	7.54161	5.89877	757.13	51.08	2	17	17	46	462	50.0821	9.01221
	P63001	Ras-related C3 botulinum toxin substrate 1 OS	Rac1	0.787864	0.89823	0.702452	117.48	17.19	6	2	3	5	192	21.4362	8.49951
	P02088	Hemoglobin subunit beta-1 OS	Hbb-b1	1.11646	1.02536	0.801228	3422.8	70.75	3	9	9	223	147	15.8301	7.6499
	Q9CPQ8	ATP synthase subunit g, mitochondrial OS	Atp5mg	1.05734	7.36472	5.75203	87.8057	15.53	1	2	2	7	103	11.4172	9.74463
	Q99JY0	Trifunctional enzyme subunit beta, mitochondrial OS	Hadhb	0.683746	1.37822	1.07635	99.42	5.47	1	3	3	4	475	51.3534	9.37842
	Q9D1R9	60S ribosomal protein L34 OS	Rpl34	0.78078	10.867	8.48586	350.049	36.75	1	6	6	19	117	13.2844	11.4731
	Q3TW96	UDP-N-acetylhexosamine pyrophosphorylase-like protein 1 OS	Uap1l1	0.969072	3.45946	2.70063	108.11	6.9	2	3	3	4	507	56.5777	5.42725
	Q8BUV3	Gephyrin OS	Gphn	0.735998	5.11384	3.98865	119.527	3.64	1	2	2	3	769	83.2298	5.60498
	Q8R059	UDP-glucose 4-epimerase OS	Gale	0.760659	3.61719	2.81796	50.0233	7.2	1	2	2	3	347	38.2003	6.7417
	P83882	60S ribosomal protein L36a OS	Rpl36a	0.789648	6.46675	5.03648	111.355	25.47	1	4	4	9	106	12.4328	10.5796
	P63073	Eukaryotic translation initiation factor 4E OS	Eif4e	0.709995	2.63077	2.04871	62.4933	9.68	1	2	2	3	217	25.0375	6.15088
	P63038	60 kDa heat shock protein, mitochondrial OS	Hspd1	0.732331	1.8786	1.46282	1138.3	39.27	1	20	20	49	573	60.9174	6.17627
	Q91WK2	Eukaryotic translation initiation factor 3 subunit H OS	Eif3h	0.699504	3.97591	3.09496	44.34	5.4	1	2	2	3	352	39.807	6.66846
	P24270	Catalase OS	Cat	0.845399	0.38898	0.302703	460.404	30.74	1	14	14	24	527	59.7577	7.88428
	Q9DBJ1	Phosphoglycerate mutase 1 OS	Pgam1	0.774427	2.89047	2.24806	407.82	44.09	1	5	9	17	254	28.8139	7.18115
	Q9Z0J0	NPC intracellular cholesterol transporter 2 OS	Npc2	0.760564	1.19158	0.926604	114.253	21.48	1	3	3	6	149	16.4315	7.6792
	Q9EQ20	Methylmalonate-semialdehyde dehydrogenase [acylating], mitochondrial OS	Aldh6a1	0.739572	0.626477	0.487062	341.04	22.43	1	11	11	20	535	57.8785	8.07471
	P14211	Calreticulin OS	Calr	0.890141	2.39201	1.85914	559.372	32.93	1	15	15	43	416	47.9649	4.48779
	Q9R1P4	Proteasome subunit alpha type-1 OS	Psma1	0.82735	1.35577	1.05301	304.935	33.84	1	10	10	20	263	29.5278	6.45557
	Q8VCT4	Carboxylesterase 1D OS	Ces1d	0.513346	0.112801	0.0876004	599.138	23.54	2	9	12	29	565	61.7487	6.60986
	Q3ULJ0	Glycerol-3-phosphate dehydrogenase 1-like protein OS	Gpd1l	0.785967	2.88158	2.23757	169.074	14.81	2	4	6	9	351	38.2009	6.771
	Q9D1A2	Cytosolic non-specific dipeptidase OS	Cndp2	0.947527	1.52465	1.18354	116.05	12.84	1	5	5	6	475	52.7336	5.65576
	Q9JJI8	60S ribosomal protein L38 OS	Rpl38	0.879603	10.0552	7.80419	98.4857	32.86	1	3	3	7	70	8.19872	10.0962
	Q03265	ATP synthase subunit alpha, mitochondrial OS	Atp5f1a	0.676752	2.74904	2.13334	1326.25	43.22	1	22	22	66	553	59.7156	9.18799
	P02802	Metallothionein-1 OS	Mt1	1.20077	9.1473	7.09215	58.74	13.11	1	1	1	3	61	6.01316	7.95752
	Q9D3D9	ATP synthase subunit delta, mitochondrial OS	Atp5f1d	0.657204	2.55244	1.97783	441.584	13.69	1	2	2	9	168	17.5891	5.08447
	Q6P5E4	UDP-glucose:glycoprotein glucosyltransferase 1 OS	Uggt1	0.807361	2.29757	1.78032	60.38	1.74	1	3	3	5	1551	176.323	5.61768
	P61961	Ubiquitin-fold modifier 1 OS	Ufm1	0.784221	8.62937	6.68268	59.5767	25.88	1	2	2	3	85	9.11187	9.30518
	P97450	ATP synthase-coupling factor 6, mitochondrial OS	Atp5pf	0.68676	2.64955	2.05183	76.1067	32.41	1	3	3	6	108	12.4886	9.36377
	Q9WTP7	GTP:AMP phosphotransferase AK3, mitochondrial OS	Ak3	0.700284	2.55936	1.98103	130.317	20.26	1	4	4	6	227	25.4105	8.83643
	Q9CYN2	Signal peptidase complex subunit 2 OS	Spcs2	0.736638	4.61461	3.57052	300.421	32.74	1	6	6	11	226	24.9617	8.57275
	Q06185	ATP synthase subunit e, mitochondrial OS	Atp5me	0.636233	2.84262	2.19712	90.73	26.76	1	2	2	3	71	8.23047	9.34912
	Q9WVE8	Protein kinase C and casein kinase substrate in neurons protein 2 OS	Pacsin2	0.782996	7.66153	5.92037	117.75	1.85	1	1	1	4	486	55.7982	5.19873
	Q9CZ44	NSFL1 cofactor p47 OS	Nsfl1c	0.676028	1.63521	1.26306	116.002	9.73	1	3	3	4	370	40.6854	5.14795
	Q60854	Serpin B6 OS	Serpinb6	0.749896	0.377213	0.291212	56.01	8.73	1	4	4	6	378	42.5712	5.74463
	P62869	Elongin-B OS	Elob	0.794953	1.23225	0.949989	72.2116	22.03	1	4	4	5	118	13.1616	5.0083
	P62702	40S ribosomal protein S4, X isoform OS	Rps4x	0.722478	6.8883	5.30627	617.476	48.67	1	13	13	34	263	29.5791	10.1548
	Q9D0I9	Arginine--tRNA ligase, cytoplasmic OS	Rars1	0.741016	4.72271	3.63478	187.309	13.79	1	8	8	11	660	75.6251	7.54736
	P08113	Endoplasmin OS	Hsp90b1	0.947904	2.65642	2.04415	820.947	23.94	1	20	21	48	802	92.4183	4.81787
	P16015	Carbonic anhydrase 3 OS	Ca3	0.654457	0.137493	0.105677	1697.97	68.85	1	14	14	78	260	29.3476	7.37158
	Q9D8N0	Elongation factor 1-gamma OS	Eef1g	0.677669	4.98857	3.83367	582.346	37.3	1	18	18	48	437	50.0292	6.7417
	P53026	60S ribosomal protein L10a OS	Rpl10a	0.651509	7.65014	5.87471	266.414	27.65	1	5	5	12	217	24.9006	9.979
	P10649	Glutathione S-transferase Mu 1 OS	Gstm1	0.602352	0.245445	0.188475	557.903	51.83	2	9	12	34	218	25.9531	7.94287
	Q9QUH0	Glutaredoxin-1 OS	Glrx	0.874066	5.58445	4.28653	99.7233	29.91	1	4	4	6	107	11.8631	8.36768
	Q9D0F9	Phosphoglucomutase-1 OS	Pgm1	0.690738	0.506321	0.388593	283.127	16.01	2	9	9	15	562	61.3796	6.56592
	Q9WU78	Programmed cell death 6-interacting protein OS	Pdcd6ip	0.663561	1.63911	1.25791	245.289	4.37	1	3	3	7	869	95.9642	6.52197
	P01942	Hemoglobin subunit alpha OS	Hba	1.16278	1.22873	0.942479	4692.92	67.61	2	8	8	332	142	15.0758	8.22119
	Q8R197	S-acyl fatty acid synthase thioesterase, medium chain OS	Olah	0.705461	4.30385	3.29969	274.409	40	1	10	10	27	265	30.2307	6.60986
	P51410	60S ribosomal protein L9 OS	Rpl9	0.75925	7.66614	5.87424	248.533	32.81	1	6	6	15	192	21.8678	9.94971
	Q8JZQ9	Eukaryotic translation initiation factor 3 subunit B OS	Eif3b	0.750761	3.84659	2.94651	228.068	6.72	1	6	6	14	803	91.3131	5.021
	Q9CWS0	N(G),N(G)-dimethylarginine dimethylaminohydrolase 1 OS	Ddah1	0.82358	4.51145	3.45381	98.73	9.47	1	3	3	7	285	31.3609	5.97314
	Q9JII6	Aldo-keto reductase family 1 member A1 OS	Akr1a1	0.768147	0.865628	0.66233	58.5167	5.85	1	2	2	3	325	36.5639	7.38623
	Q9D051	Pyruvate dehydrogenase E1 component subunit beta, mitochondrial OS	Pdhb	0.675977	2.70491	2.06928	940.174	39	1	12	12	36	359	38.912	6.87354
	Q9D023	Mitochondrial pyruvate carrier 2 OS	Mpc2	0.571261	3.35391	2.56536	115.976	23.62	1	3	3	7	127	14.2766	10.6089
	P15626	Glutathione S-transferase Mu 2 OS	Gstm2	0.600614	0.339114	0.2593	301.323	32.57	4	4	7	13	218	25.7	7.38623
	Q9CQ69	Cytochrome b-c1 complex subunit 8 OS	Uqcrq	0.578922	2.03662	1.55646	36.7366	18.29	1	2	2	3	82	9.76211	10.2573
	O35855	Branched-chain-amino-acid aminotransferase, mitochondrial OS	Bcat2	1.00391	1.92821	1.47254	320.47	24.94	1	8	8	16	393	44.0988	8.29443
	P51881	ADP/ATP translocase 2 OS	Slc25a5	0.676615	4.34417	3.31642	581.993	41.61	3	15	15	33	298	32.9102	9.72998
	Q9CQV8	14-3-3 protein beta/alpha OS	Ywhab	0.887215	0.544725	0.4157	666.846	36.18	1	3	10	39	246	28.0689	4.83057
	Q9CY27	Very-long-chain enoyl-CoA reductase OS	Tecr	0.62785	3.08284	2.35043	216.612	17.21	1	6	6	16	308	36.0668	9.5542
	P62889	60S ribosomal protein L30 OS	Rpl30	0.795699	6.73114	5.13018	250.673	49.57	1	5	5	15	115	12.7757	9.62744
	P28474	Alcohol dehydrogenase class-3 OS	Adh5	0.664298	1.16022	0.884255	120.317	6.42	1	3	3	6	374	39.5221	7.25439
	Q8BGQ7	Alanine--tRNA ligase, cytoplasmic OS	Aars1	0.765955	2.28083	1.73706	37.16	4.34	1	4	4	4	968	106.841	5.66846
	P12787	Cytochrome c oxidase subunit 5A, mitochondrial OS	Cox5a	0.595075	3.64874	2.77872	89.2691	11.64	1	3	3	9	146	16.0913	6.53662
	P48036	Annexin A5 OS	Anxa5	0.607053	0.25781	0.19606	527.467	39.5	1	13	13	30	319	35.7302	4.95752
	P57780	Alpha-actinin-4 OS	Actn4	0.762578	1.44681	1.1001	568.031	26.97	3	13	21	35	912	104.911	5.41455
	Q8CHP8	Glycerol-3-phosphate phosphatase OS	Pgp	0.844855	4.50655	3.42606	223.14	17.45	1	5	5	8	321	34.5187	5.35107
	P80313	T-complex protein 1 subunit eta OS	Cct7	0.794813	2.13997	1.62576	98.03	4.6	1	3	3	4	544	59.6141	7.84033
	Q8BMS1	Trifunctional enzyme subunit alpha, mitochondrial OS	Hadha	0.687224	1.51625	1.1518	210.613	12.45	1	9	9	15	763	82.6175	9.14404
	Q80X90	Filamin-B OS	Flnb	0.834718	2.21228	1.68051	102.8	1.5	2	3	5	8	2602	277.651	5.70654
	Q9CZM2	60S ribosomal protein L15 OS	Rpl15	0.723848	6.06941	4.60595	409.369	49.51	1	12	12	30	204	24.1311	11.6196
	P52480	Pyruvate kinase PKM OS	Pkm	0.736233	2.64649	2.00791	1745.76	63.47	2	29	29	86	531	57.808	7.47412
	Q9WUA2	Phenylalanine--tRNA ligase beta subunit OS	Farsb	0.800887	3.40654	2.5842	75.5977	4.58	1	3	3	4	589	65.6553	7.12256
	Q8BMA6	Signal recognition particle subunit SRP68 OS	Srp68	0.722931	4.49387	3.40685	237.537	10.88	1	7	7	16	625	70.5303	8.57275
	Q8BWT1	3-ketoacyl-CoA thiolase, mitochondrial OS	Acaa2	0.69392	1.71542	1.2995	226.55	21.41	1	7	7	10	397	41.8034	8.08936
	Q9DCH4	Eukaryotic translation initiation factor 3 subunit F OS	Eif3f	0.673213	3.0575	2.31553	133.6	12.19	1	4	4	5	361	37.9603	5.57959
	Q9Z2I9	Succinate--CoA ligase [ADP-forming] subunit beta, mitochondrial OS	Sucla2	0.751228	1.11358	0.842945	107.29	9.07	1	3	3	4	463	50.0821	7.00537
	P62717	60S ribosomal protein L18a OS	Rpl18a	0.65696	7.52387	5.69412	400.007	53.41	1	11	11	22	176	20.7189	10.7114
	Q91WU0	Carboxylesterase 1F OS	Ces1f	0.538497	0.103056	0.0779513	40.85	5.7	1	2	3	5	561	61.5732	6.48096
	P62918	60S ribosomal protein L8 OS	Rpl8	0.738117	8.61151	6.51257	322.598	51.75	1	16	16	25	257	28.0073	11.0337
	Q99LC5	Electron transfer flavoprotein subunit alpha, mitochondrial OS	Etfa	0.688626	0.798617	0.60393	295.696	33.93	1	11	11	20	333	34.9875	8.38232
	P46638	Ras-related protein Rab-11B OS	Rab11b	0.826679	1.53333	1.15768	314.201	33.03	3	8	8	18	218	24.4745	5.93506
	P19536	Cytochrome c oxidase subunit 5B, mitochondrial OS	Cox5b	0.69371	3.04419	2.29826	123.246	37.5	1	5	5	10	128	13.8039	8.38232
	Q6ZQI3	Malectin OS	Mlec	0.798567	4.0263	3.03911	129.27	15.46	1	5	5	9	291	32.3218	6.04932
	P10598	Beta-casein OS	Csn2	2.88199	11.0845	8.3619	327.849	12.12	1	2	2	14	231	25.3214	6.25244
	Q8BGD9	Eukaryotic translation initiation factor 4B OS	Eif4b	0.75553	2.65437	2.00227	114.917	6.71	1	3	3	3	611	68.7992	5.66846
	O70194	Eukaryotic translation initiation factor 3 subunit D OS	Eif3d	0.574859	1.69954	1.28064	86.99	6.2	1	3	3	4	548	63.9484	6.04932
	Q8BP67	60S ribosomal protein L24 OS	Rpl24	0.76924	12.8673	9.68837	274.07	40.13	1	7	7	14	157	17.7679	11.2534
	P14824	Annexin A6 OS	Anxa6	0.591609	0.868517	0.653309	446.243	21.84	1	15	15	24	673	75.8374	5.50342
	P28271	Cytoplasmic aconitate hydratase OS	Aco1	0.677803	1.94978	1.46612	274.595	13.5	2	12	12	25	889	98.0635	7.50342
	P68037	Ubiquitin-conjugating enzyme E2 L3 OS	Ube2l3	0.741225	1.67261	1.25666	163.95	46.1	1	5	5	6	154	17.8502	8.51416
	Q9CPR4	60S ribosomal protein L17 OS	Rpl17	0.736834	9.67298	7.2642	245.508	40.76	1	8	8	13	184	21.4094	10.1841
	Q9CQR2	40S ribosomal protein S21 OS	Rps21	0.661127	6.19921	4.65189	171.659	31.33	1	3	3	9	83	9.13555	8.51416
	Q61753	D-3-phosphoglycerate dehydrogenase OS	Phgdh	0.608846	2.0749	1.55673	344.246	21.95	1	11	11	15	533	56.5491	6.53662
	Q9D172	Glutamine amidotransferase-like class 1 domain-containing protein 3A, mitochondrial OS	Gatd3a	0.751244	1.3066	0.979102	326.684	25.56	1	5	5	12	266	28.0728	8.77783
	O70318	Band 4.1-like protein 2 OS	Epb41l2	0.631058	0.282901	0.211819	207.31	4.86	2	4	4	8	988	109.873	5.42725
	P68040	Receptor of activated protein C kinase 1 OS	Rack1	0.740892	7.83819	5.86788	475.62	63.41	1	17	17	34	317	35.0546	7.69385
	P17751	Triosephosphate isomerase OS	Tpi1	0.706312	1.20786	0.903955	641.1	39.13	1	10	10	26	299	32.1713	5.74463
	Q8BU30	Isoleucine--tRNA ligase, cytoplasmic OS	Iars1	0.810282	6.70628	5.01683	246.002	6.1	1	9	9	16	1262	144.179	6.55127
	P09103	Protein disulfide-isomerase OS	P4hb	0.726019	6.44808	4.82253	1659.47	53.24	1	31	31	100	509	57.0228	4.88135
	P61358	60S ribosomal protein L27 OS	Rpl27	0.690038	5.10481	3.8177	256.39	41.91	1	5	5	14	136	15.7877	10.5649
	Q60597	2-oxoglutarate dehydrogenase, mitochondrial OS	Ogdh	0.630736	0.960615	0.718404	209.155	8.41	1	10	10	14	1023	116.375	6.82959
	P46471	26S proteasome regulatory subunit 7 OS	Psmc2	0.739176	1.5199	1.13576	234.793	5.08	1	2	2	6	433	48.6171	5.94775
	Q9D8E6	60S ribosomal protein L4 OS	Rpl4	0.746318	7.85187	5.86177	602.68	31.74	1	13	13	30	419	47.124	11.0044
	P18572	Basigin OS	Bsg	0.602784	1.5854	1.18301	81.82	7.71	1	3	3	6	389	42.4183	5.84619
	Q8QZS1	3-hydroxyisobutyryl-CoA hydrolase, mitochondrial OS	Hibch	0.693449	1.15624	0.86201	127.042	8.05	1	3	3	6	385	43.0102	8.06006
	Q9DCN2	NADH-cytochrome b5 reductase 3 OS	Cyb5r3	0.626479	1.13683	0.847377	114.49	10.96	1	3	3	5	301	34.1057	8.38232
	Q8R0N6	Hydroxyacid-oxoacid transhydrogenase, mitochondrial OS	Adhfe1	0.650887	0.365476	0.272057	61.5567	1.72	1	1	1	3	465	49.9053	7.57666
	P08228	Superoxide dismutase [Cu-Zn] OS	Sod1	0.68341	0.85853	0.639008	1269.51	35.06	1	6	6	56	154	15.9328	6.50732
	Q80WW9	DDRGK domain-containing protein 1 OS	Ddrgk1	0.655504	5.8006	4.31702	142.947	11.11	1	3	3	6	315	35.9557	5.35107
	P35505	Fumarylacetoacetase OS	Fah	0.780811	3.45218	2.56915	455.98	28.64	1	9	9	18	419	46.146	7.18115
	P47964	60S ribosomal protein L36 OS	Rpl36	0.915056	6.85576	5.10192	88.0042	15.24	1	2	2	3	105	12.2078	11.3413
	P16858	Glyceraldehyde-3-phosphate dehydrogenase OS	Gapdh	0.776538	2.33822	1.7397	703.31	52.85	2	14	14	37	333	35.7872	8.25049
	Q9DCW4	Electron transfer flavoprotein subunit beta OS	Etfb	0.648196	0.802868	0.597104	330.601	33.33	1	7	7	15	255	27.606	8.104
	Q9Z1D1	Eukaryotic translation initiation factor 3 subunit G OS	Eif3g	0.703836	2.95377	2.19602	129.077	8.44	1	4	4	6	320	35.6159	5.89697
	O09131	Glutathione S-transferase omega-1 OS	Gsto1	0.701648	2.26505	1.68225	72.2992	10	1	3	3	6	240	27.4799	7.35693
	P62984	Ubiquitin-60S ribosomal protein L40 OS	Uba52	0.837975	26.2155	19.4695	160.15	34.38	3	1	4	10	128	14.719	9.83252
	Q8K183	Pyridoxal kinase OS	Pdxk	0.723538	3.01466	2.23864	30.93	12.5	1	3	3	5	312	34.9927	6.29053
	Q91YH5	Atlastin-3 OS	Atl3	0.637696	0.75395	0.559216	68.8267	3.88	1	2	2	3	541	60.5366	6.1001
	Q8BKZ9	Pyruvate dehydrogenase protein X component, mitochondrial OS	Pdhx	0.760342	2.95867	2.19095	181.424	8.18	1	5	5	11	501	53.9652	7.75244
	P53994	Ras-related protein Rab-2A OS	Rab2a	0.748735	1.63776	1.21159	89.81	21.23	2	4	4	6	212	23.5328	6.53662
	Q8BTZ7	Mannose-1-phosphate guanyltransferase beta OS	Gmppb	0.978252	4.04031	2.98694	107.57	6.39	1	2	2	4	360	39.8906	6.7417
	Q9WUM5	Succinate--CoA ligase [ADP/GDP-forming] subunit alpha, mitochondrial OS	Suclg1	0.726269	1.9145	1.41505	257.688	20.52	1	6	6	12	346	36.132	9.39307
	Q9D823	60S ribosomal protein L37 OS	Rpl37	0.731405	11.7632	8.68622	63.51	14.43	1	2	2	5	97	11.0709	11.7368
	Q99LX0	Parkinson disease protein 7 homolog OS	Park7	0.73409	1.01619	0.749234	206.436	20.63	1	5	5	11	189	20.0084	6.771
	Q8BML9	Glutamine--tRNA ligase OS	Qars1	0.81348	3.61359	2.66352	220.817	13.42	1	10	10	14	775	87.6209	7.31299
	Q9CQC6	Basic leucine zipper and W2 domain-containing protein 1 OS	Bzw1	0.700073	2.46259	1.81394	126.8	5.49	1	3	3	7	419	48.0127	5.92236
	O08691	Arginase-2, mitochondrial OS	Arg2	0.683196	6.30348	4.6372	98.86	11.86	1	3	3	3	354	38.8541	6.58057
	P15105	Glutamine synthetase OS	Glul	0.723302	0.572888	0.421414	381.053	27.35	1	10	10	22	373	42.0923	7.07861
	P27659	60S ribosomal protein L3 OS	Rpl3	0.678009	5.77623	4.2485	583.437	24.57	1	14	14	40	403	46.0808	10.2134
	Q91W90	Thioredoxin domain-containing protein 5 OS	Txndc5	0.762465	2.98671	2.19585	98.59	7.67	1	3	3	4	417	46.3859	5.78271
	Q9D2G2	Dihydrolipoyllysine-residue succinyltransferase component of 2-oxoglutarate dehydrogenase complex, mitochondrial OS	Dlst	0.672425	0.854454	0.628098	165.242	8.59	1	4	4	11	454	48.9635	8.95361
	Q8R1I1	Cytochrome b-c1 complex subunit 9 OS	Uqcr10	0.558361	2.17073	1.59301	153.15	26.56	1	1	1	3	64	7.44087	9.18799
	Q99NB1	Acetyl-coenzyme A synthetase 2-like, mitochondrial OS	Acss1	1.15374	5.9354	4.3548	181.36	11.44	1	7	7	12	682	74.5758	6.97607
	Q9CRA5	Golgi phosphoprotein 3 OS	Golph3	0.980167	8.07222	5.92225	155.03	7.72	1	2	2	3	298	33.7315	6.44287
	P20029	Endoplasmic reticulum chaperone BiP OS	Hspa5	0.882673	3.34353	2.44873	1476.21	45.04	1	27	30	74	655	72.3775	5.16064
	P80314	T-complex protein 1 subunit beta OS	Cct2	0.817757	1.90057	1.39109	54.87	7.1	1	3	3	3	535	57.4411	6.40479
	Q9WTP6	Adenylate kinase 2, mitochondrial OS	Ak2	0.750972	1.56823	1.14711	266.75	26.36	1	5	5	10	239	26.4517	7.38623
	Q8JZU2	Tricarboxylate transport protein, mitochondrial OS	Slc25a1	0.589619	3.49006	2.55128	493.71	31.51	1	11	11	28	311	33.9099	9.89111
	Q9DB77	Cytochrome b-c1 complex subunit 2, mitochondrial OS	Uqcrc2	0.62498	2.22795	1.62691	230.275	11.92	1	6	6	11	453	48.205	9.24658
	Q99L45	Eukaryotic translation initiation factor 2 subunit 2 OS	Eif2s2	0.73691	5.98473	4.36798	207.543	15.11	1	5	5	9	331	38.0682	5.79541
	Q9Z0S1	3'(2'),5'-bisphosphate nucleotidase 1 OS	Bpnt1	0.701871	1.8925	1.38122	97.2529	9.74	1	3	3	8	308	33.1751	5.8208
	Q9R1P3	Proteasome subunit beta type-2 OS	Psmb2	0.774863	1.3862	1.01137	49.1709	16.42	1	4	4	5	201	22.8917	7.02002
	Q62465	Synaptic vesicle membrane protein VAT-1 homolog OS	Vat1	0.589919	0.738494	0.53871	71.44	7.64	1	3	3	4	406	43.069	6.3667
	Q8K2B3	Succinate dehydrogenase [ubiquinone] flavoprotein subunit, mitochondrial OS	Sdha	0.655389	1.21103	0.881614	411.003	19.88	1	11	11	16	664	72.5392	7.37158
	Q9DCF9	Translocon-associated protein subunit gamma OS	Ssr3	0.590574	1.92981	1.40001	93.15	7.57	1	1	1	4	185	21.0512	9.61279
	Q9CZ13	Cytochrome b-c1 complex subunit 1, mitochondrial OS	Uqcrc1	0.641173	2.35241	1.70623	327.298	24.58	2	11	11	20	480	52.8185	6.21436
	Q9JK38	Glucosamine 6-phosphate N-acetyltransferase OS	Gnpnat1	0.732404	4.17598	3.02776	112.637	5.98	1	1	1	3	184	20.7777	7.69385
	Q8BMF4	Dihydrolipoyllysine-residue acetyltransferase component of pyruvate dehydrogenase complex, mitochondrial OS	Dlat	0.713822	3.17272	2.29885	464.992	22.59	1	12	12	21	642	67.8987	8.57275
	Q8CGK3	Lon protease homolog, mitochondrial OS	Lonp1	0.690533	1.15019	0.833055	121.52	1.9	1	2	2	5	949	105.776	6.56592
	O08749	Dihydrolipoyl dehydrogenase, mitochondrial OS	Dld	0.653235	1.65244	1.19676	366.8	23.58	1	11	11	20	509	54.2382	7.89893
	Q4VAA2	Protein CDV3 OS	Cdv3	0.911724	3.20991	2.32137	126.29	13.17	1	3	3	5	281	29.7113	6.1001
	Q9D0F3	Protein ERGIC-53 OS	Lman1	0.789594	3.62978	2.62497	297.094	17.41	1	7	7	14	517	57.7529	6.34131
	P15532	Nucleoside diphosphate kinase A OS	Nme1	0.771408	5.19664	3.75762	498.618	43.42	1	2	6	31	152	17.1969	7.37158
	Q9WUK2	Eukaryotic translation initiation factor 4H OS	Eif4h	0.701045	2.34642	1.69637	48.3633	6.45	1	2	2	3	248	27.3244	7.2251
	P67778	Prohibitin OS	Phb	0.654699	2.50154	1.80832	92.1367	6.62	1	2	2	7	272	29.8019	5.75732
	P54071	Isocitrate dehydrogenase [NADP], mitochondrial OS	Idh2	0.793213	1.31263	0.947966	184.29	13.94	1	6	7	11	452	50.8739	8.68994
	P19228	Alpha-S1-casein OS	Csn1s1	1.04627	5.38854	3.89144	1143.49	27.48	1	7	7	105	313	35.5798	6.29053
	Q9CZU6	Citrate synthase, mitochondrial OS	Cs	0.660756	6.3127	4.5586	810.156	30.82	1	13	13	44	464	51.7034	8.57275
	Q60817	Nascent polypeptide-associated complex subunit alpha OS	Naca	0.67519	2.87077	2.07206	121.233	16.28	2	3	3	7	215	23.3697	4.56396
	O88492	Perilipin-4 OS	Plin4	0.576212	0.201165	0.145071	68.6733	7.48	1	2	2	3	1403	139.328	8.5874
	Q9D9V3	Ethylmalonyl-CoA decarboxylase OS	Echdc1	0.734633	2.33066	1.68045	362.712	30.12	1	9	9	20	322	35.4444	7.00537
	Q9D1M0	Protein SEC13 homolog OS	Sec13	0.888754	3.3664	2.42612	43.82	6.21	1	3	3	3	322	35.5431	5.37646
	Q64674	Spermidine synthase OS	Srm	0.737507	4.55534	3.28064	174.794	25.17	1	7	7	14	302	33.9728	5.50342
	Q78PY7	Staphylococcal nuclease domain-containing protein 1 OS	Snd1	0.711073	10.7962	7.77404	1034.13	35.71	1	28	28	61	910	102.025	7.43018
	P63325	40S ribosomal protein S10 OS	Rps10	0.739829	9.85642	7.09328	253.445	63.03	1	9	10	29	165	18.9038	10.1548
	Q91YQ5	Dolichyl-diphosphooligosaccharide--protein glycosyltransferase subunit 1 OS	Rpn1	0.695988	4.28811	3.08365	684.022	29.44	1	17	17	35	608	68.4857	6.45557
	Q9QXG4	Acetyl-coenzyme A synthetase, cytoplasmic OS	Acss2	0.787271	0.887044	0.63751	83.0367	3.57	1	3	3	3	701	78.8112	6.63916
	P97807	Fumarate hydratase, mitochondrial OS	Fh	0.854847	1.49686	1.07499	229.97	15.78	1	9	9	11	507	54.3221	9.0415
	P20108	Thioredoxin-dependent peroxide reductase, mitochondrial OS	Prdx3	0.798505	1.58534	1.13815	202.623	31.91	1	6	6	9	257	28.1094	7.57666
	Q8R4N0	Citramalyl-CoA lyase, mitochondrial OS	Clybl	0.697528	0.751147	0.538974	67.6911	4.44	1	2	2	8	338	37.5248	8.54346
	P14152	Malate dehydrogenase, cytoplasmic OS	Mdh1	0.757227	2.03209	1.45749	1089.63	43.71	1	15	15	52	334	36.4881	6.58057
	Q8R050	Eukaryotic peptide chain release factor GTP-binding subunit ERF3A OS	Gspt1	0.779725	3.12415	2.23637	92.03	4.25	2	3	3	4	636	68.5819	5.21143
	Q05920	Pyruvate carboxylase, mitochondrial OS	Pc	0.71226	1.27591	0.912173	1944.65	41.43	1	41	41	93	1178	129.602	6.7124
	P58021	Transmembrane 9 superfamily member 2 OS	Tm9sf2	0.843991	4.24773	3.03189	116.178	5.29	1	4	4	10	662	75.2802	7.43018
	P99026	Proteasome subunit beta type-4 OS	Psmb4	0.750072	3.24688	2.31596	30.16	6.82	1	2	2	3	264	29.0973	5.64307
	P35980	60S ribosomal protein L18 OS	Rpl18	0.728854	4.1454	2.95538	275.891	34.04	1	7	7	14	188	21.6312	11.7808
	P80318	T-complex protein 1 subunit gamma OS	Cct3	0.795836	2.02376	1.44273	108.82	8.44	1	5	5	7	545	60.5914	6.69775
	Q9QZE5	Coatomer subunit gamma-1 OS	Copg1	0.755827	4.69717	3.34735	576.43	14.07	2	12	12	25	874	97.4504	5.35107
	P23116	Eukaryotic translation initiation factor 3 subunit A OS	Eif3a	0.751867	3.23693	2.30454	503.689	18.3	1	26	26	46	1344	161.838	6.771
	O08547	Vesicle-trafficking protein SEC22b OS	Sec22b	0.705016	2.71701	1.9317	86.83	19.53	1	4	4	5	215	24.7248	8.51416
	P45952	Medium-chain specific acyl-CoA dehydrogenase, mitochondrial OS	Acadm	0.851682	1.13914	0.809296	156.76	12.59	1	4	4	8	421	46.4516	8.36768
	O35129	Prohibitin-2 OS	Phb2	0.736447	2.36927	1.68322	143.843	23.41	1	7	7	11	299	33.2759	9.83252
	Q8QZT1	Acetyl-CoA acetyltransferase, mitochondrial OS	Acat1	0.65279	2.35807	1.67514	198.989	17.92	1	8	8	12	424	44.7873	8.51416
	P09671	Superoxide dismutase [Mn], mitochondrial OS	Sod2	0.950476	1.92079	1.36385	105.49	13.51	1	4	4	8	222	24.5875	8.6167
	Q6NZJ6	Eukaryotic translation initiation factor 4 gamma 1 OS	Eif4g1	0.581343	2.83724	2.01195	141.138	4.19	2	7	7	9	1600	175.967	5.40186
	Q8VHE0	Translocation protein SEC63 homolog OS	Sec63	0.711359	6.52837	4.62766	119.631	2.24	1	2	2	4	760	87.8146	5.37646
	Q8R0Y6	Cytosolic 10-formyltetrahydrofolate dehydrogenase OS	Aldh1l1	0.797207	0.819751	0.580638	166.2	7.43	2	8	8	11	902	98.6465	5.90967
	Q9Z0X1	Apoptosis-inducing factor 1, mitochondrial OS	Aifm1	0.769179	3.17303	2.24733	120.59	5.07	1	3	3	5	612	66.7238	9.17334
	P35486	Pyruvate dehydrogenase E1 component subunit alpha, somatic form, mitochondrial OS	Pdha1	0.672402	2.71476	1.92176	924.272	44.36	2	19	19	53	390	43.2036	8.19189
	P62897	Cytochrome c, somatic OS	Cycs	1.21961	5.94158	4.202	153.848	56.19	2	5	5	10	105	11.598	9.5835
	P08249	Malate dehydrogenase, mitochondrial OS	Mdh2	0.963688	3.28325	2.32176	1027.48	64.2	1	18	18	52	338	35.5888	8.67529
	Q6P1B1	Xaa-Pro aminopeptidase 1 OS	Xpnpep1	0.828045	2.75116	1.94548	44.17	3.69	1	3	3	3	623	69.547	5.5415
	Q61024	Asparagine synthetase [glutamine-hydrolyzing] OS	Asns	0.696922	4.35605	3.07067	136.951	8.73	1	4	4	6	561	64.2415	6.58057
	Q64516	Glycerol kinase OS	Gk	0.756346	8.33422	5.87356	469.145	15.92	3	10	10	22	559	61.188	5.87158
	Q01853	Transitional endoplasmic reticulum ATPase OS	Vcp	0.693184	1.62823	1.14742	937.526	37.72	1	24	24	47	806	89.2657	5.26221
	P47963	60S ribosomal protein L13 OS	Rpl13	0.698745	9.49871	6.68832	409.542	35.55	1	8	8	20	211	24.2905	11.5464
	P45376	Aldo-keto reductase family 1 member B1 OS	Akr1b1	0.719977	0.77978	0.548584	304.82	34.18	1	9	9	13	316	35.7095	7.18115
	P47962	60S ribosomal protein L5 OS	Rpl5	0.801745	7.92916	5.57021	222.132	26.6	1	7	7	15	297	34.3787	9.77393
	O70423	Membrane primary amine oxidase OS	Aoc3	0.620733	0.306144	0.214644	573.84	15.03	2	10	10	25	765	84.4803	6.41748
	Q8VEM8	Phosphate carrier protein, mitochondrial OS	Slc25a3	0.639535	3.29968	2.30882	374.345	19.61	1	7	7	19	357	39.6065	9.26123
	P62196	26S proteasome regulatory subunit 8 OS	Psmc5	0.737567	1.67826	1.17386	213.987	4.93	1	2	2	6	406	45.5971	7.54736
	P62821	Ras-related protein Rab-1A OS	Rab1A	0.794624	3.9068	2.72893	452.411	55.61	19	10	12	25	205	22.6634	6.21436
	Q9CR57	60S ribosomal protein L14 OS	Rpl14	0.754642	4.66021	3.25415	304.156	29.03	1	6	6	17	217	23.5492	11.019
	Q8C0N2	Glycerol-3-phosphate acyltransferase 3 OS	Gpat3	0.922883	0.168986	0.117892	75.6767	2.74	1	1	1	4	438	48.9687	8.93896
	P41216	Long-chain-fatty-acid--CoA ligase 1 OS	Acsl1	0.645242	3.08545	2.14811	1988.22	50.79	3	35	35	114	699	77.9014	7.15186
	Q00612	Glucose-6-phosphate 1-dehydrogenase X OS	G6pdx	0.617004	2.45696	1.71034	747.16	39.03	2	22	22	63	515	59.2248	6.49365
	Q9Z2I8	Succinate--CoA ligase [GDP-forming] subunit beta, mitochondrial OS	Suclg2	0.748242	3.94744	2.74713	133.675	9.7	1	5	5	8	433	46.8107	7.02002
	Q9DBL1	Short/branched chain specific acyl-CoA dehydrogenase, mitochondrial OS	Acadsb	0.716034	2.07942	1.44574	146.227	12.27	1	3	3	6	432	47.8433	7.86963
	P53395	Lipoamide acyltransferase component of branched-chain alpha-keto acid dehydrogenase complex, mitochondrial OS	Dbt	0.787043	1.46133	1.01556	94.27	6.85	1	3	3	5	482	53.2129	8.60205
	Q9D8W5	26S proteasome non-ATPase regulatory subunit 12 OS	Psmd12	0.797648	1.59346	1.10621	67.97	3.07	1	2	2	3	456	52.8615	7.06396
	P80315	T-complex protein 1 subunit delta OS	Cct4	0.859256	2.31007	1.60228	154.83	12.24	1	7	7	12	539	58.0297	8.01611
	P62960	Y-box-binding protein 1 OS	Ybx1	0.899345	3.65988	2.53563	96.0333	4.66	1	1	1	3	322	35.7086	9.87646
	Q8VDJ3	Vigilin OS	Hdlbp	0.784497	4.96156	3.42832	354.257	10.49	1	13	13	22	1268	141.655	6.87354
	Q99KI0	Aconitate hydratase, mitochondrial OS	Aco2	0.690892	1.34735	0.930257	1158.35	32.95	1	25	25	65	780	85.41	7.92822
	Q9DBE0	Cysteine sulfinic acid decarboxylase OS	Csad	0.727716	0.518965	0.357963	84.36	1.83	1	1	1	4	493	55.1094	6.60986
	Q8CID3	Pseudokinase FAM20A OS	Fam20a	0.8006	2.54375	1.75383	48.6267	9.24	1	3	3	3	541	61.4865	7.98682
	Q9CPQ1	Cytochrome c oxidase subunit 6C OS	Cox6c	0.655632	3.81464	2.62596	154.029	30.26	1	4	4	9	76	8.46351	10.1401
	Q9CQA3	Succinate dehydrogenase [ubiquinone] iron-sulfur subunit, mitochondrial OS	Sdhb	0.662088	1.17439	0.806823	68.8934	8.87	1	3	3	5	282	31.7929	8.67529
	P06801	NADP-dependent malic enzyme OS	Me1	0.582693	2.47335	1.68923	1201.19	49.48	1	22	22	78	572	63.9131	7.44482
	Q8CI94	Glycogen phosphorylase, brain form OS	Pygb	0.667665	1.03496	0.706434	261.547	12.93	1	6	11	17	843	96.6685	6.72705
	P47911	60S ribosomal protein L6 OS	Rpl6	0.664771	7.98992	5.45178	454.68	38.51	1	13	13	29	296	33.4889	10.6968
	P30416	Peptidyl-prolyl cis-trans isomerase FKBP4 OS	Fkbp4	0.786269	2.86793	1.95149	166.25	6.99	1	3	3	6	458	51.5399	5.71924
	Q99KK7	Dipeptidyl peptidase 3 OS	Dpp3	0.775258	2.9018	1.97095	35.01	2.3	1	2	2	3	738	82.8461	5.37646
	O35737	Heterogeneous nuclear ribonucleoprotein H OS	Hnrnph1	0.82279	1.28692	0.873693	43.1067	5.57	3	3	3	3	449	49.1684	6.30322
	Q9D8S3	ADP-ribosylation factor GTPase-activating protein 3 OS	Arfgap3	0.82006	11.4383	7.75696	96.3829	5.16	1	3	3	7	523	57.4202	8.47021
	P47738	Aldehyde dehydrogenase, mitochondrial OS	Aldh2	0.675643	0.595405	0.403297	590.193	36.8	3	15	15	26	519	56.5018	7.62061
	P62849	40S ribosomal protein S24 OS	Rps24	0.77544	5.69816	3.85721	159.18	34.59	1	5	5	11	133	15.4134	10.7847
	P38647	Stress-70 protein, mitochondrial OS	Hspa9	0.739171	1.28038	0.865206	391.96	19.73	1	13	14	27	679	73.4156	6.07471
	Q9D855	Cytochrome b-c1 complex subunit 7 OS	Uqcrb	0.889437	2.60469	1.75485	109.403	34.23	1	4	4	7	111	13.519	9.11475
	Q8VE47	Ubiquitin-like modifier-activating enzyme 5 OS	Uba5	0.701727	4.62552	3.10888	37.3767	2.23	1	1	1	3	403	44.761	4.95752
	Q91V41	Ras-related protein Rab-14 OS	Rab14	0.857899	2.12198	1.42599	143.17	22.79	14	4	5	9	215	23.8819	6.21436
	Q91V92	ATP-citrate synthase OS	Acly	0.537846	3.15993	2.12099	3515.56	60.31	1	55	55	186	1091	119.651	7.44482
	P14131	40S ribosomal protein S16 OS	Rps16	0.719661	6.20375	4.15699	387.726	47.26	1	8	8	23	146	16.435	10.2134
	O35083	1-acyl-sn-glycerol-3-phosphate acyltransferase alpha OS	Agpat1	0.609076	4.26757	2.84675	39.24	5.61	1	2	2	3	285	31.6887	9.14404
	Q8BRK8	5'-AMP-activated protein kinase catalytic subunit alpha-2 OS	Prkaa2	0.798851	6.89168	4.5917	104.543	3.08	1	2	2	4	552	61.9824	7.86963
	P05202	Aspartate aminotransferase, mitochondrial OS	Got2	1.04627	8.0031	5.32317	274.459	24.19	1	9	9	15	430	47.3812	8.99756
	O08788	Dynactin subunit 1 OS	Dctn1	0.808682	1.64026	1.08718	34.453	2.19	1	3	3	3	1281	141.588	5.89697
	Q9CYH2	Peroxiredoxin-like 2A OS	Prxl2a	0.60032	0.849564	0.56302	88.97	14.68	1	3	3	3	218	24.3789	9.17334
	Q91ZA3	Propionyl-CoA carboxylase alpha chain, mitochondrial OS	Pcca	0.74783	1.48015	0.980864	82.6591	11.19	1	7	7	12	724	79.8711	7.25439
	Q63918	Caveolae-associated protein 2 OS	Cavin2	0.509581	0.274423	0.1814	313.837	20.57	1	8	8	17	418	46.7354	5.21143
	Q9CR68	Cytochrome b-c1 complex subunit Rieske, mitochondrial OS	Uqcrfs1	0.561529	2.32103	1.53407	151.18	9.12	1	3	3	11	274	29.3492	8.70459
	P17665	Cytochrome c oxidase subunit 7C, mitochondrial OS	Cox7c	0.570353	3.52502	2.32284	94.59	28.57	1	2	2	5	63	7.32788	11.0044
	Q61249	Immunoglobulin-binding protein 1 OS	Igbp1	0.772198	4.49063	2.95471	89.81	5.59	2	2	2	4	340	38.9466	6.17627
	Q60692	Proteasome subunit beta type-6 OS	Psmb6	0.563157	1.76509	1.15546	174.946	12.61	1	3	3	7	238	25.3625	5.10986
	O88844	Isocitrate dehydrogenase [NADP] cytoplasmic OS	Idh1	0.660023	0.385392	0.252052	185.451	13.29	1	6	7	16	414	46.6445	7.1665
	O70250	Phosphoglycerate mutase 2 OS	Pgam2	1.28386	1.60067	1.04617	299.834	22.53	1	2	6	13	253	28.8088	8.49951
	Q5U405	Transmembrane protease serine 13 OS	Tmprss13	0.674126	1.02616	0.665046	48.0871	1.47	1	1	1	11	543	59.7679	9.01221
	P16254	Signal recognition particle 14 kDa protein OS	Srp14	0.630339	3.4045	2.20596	54.8133	32.73	1	3	3	3	110	12.5018	10.1694
	P32020	Non-specific lipid-transfer protein OS	Scp2	0.875445	0.485838	0.314384	70.15	5.12	1	3	3	5	547	59.0878	7.44482
	P35293	Ras-related protein Rab-18 OS	Rab18	0.756614	4.71304	3.03379	347.295	28.16	1	5	5	12	206	23.0207	5.36377
	P24369	Peptidyl-prolyl cis-trans isomerase B OS	Ppib	0.727795	13.3705	8.5812	156.224	20.37	1	5	5	11	216	23.6986	9.5542
	P46978	Dolichyl-diphosphooligosaccharide--protein glycosyltransferase subunit STT3A OS	Stt3a	0.721477	5.64523	3.61843	71.6	2.27	1	2	2	4	705	80.5449	8.104
	Q9Z110	Delta-1-pyrroline-5-carboxylate synthase OS	Aldh18a1	0.708588	7.81512	4.98807	152.038	5.91	1	5	5	9	795	87.2119	7.54736
	P62900	60S ribosomal protein L31 OS	Rpl31	0.734037	6.79012	4.32431	203.973	31.2	1	4	4	12	125	14.4539	10.5356
	Q9DBP0	Sodium-dependent phosphate transport protein 2B OS	Slc34a2	0.648502	12.857	8.13488	132.122	5.6	2	4	4	8	697	76.1945	7.6792
	Q3UIU2	NADH dehydrogenase [ubiquinone] 1 beta subcomplex subunit 6 OS	Ndufb6	0.598202	1.90329	1.20254	28.99	10.94	1	2	2	3	128	15.505	9.78857
	Q91VJ2	Caveolae-associated protein 3 OS	Cavin3	0.617261	0.418578	0.263869	134.223	14.62	1	4	4	9	260	27.8366	5.56689
	Q64310	Surfeit locus protein 4 OS	Surf4	1.17425	6.27235	3.92925	185.184	17.47	1	4	4	12	269	30.3608	7.78174
	Q9D0K2	Succinyl-CoA:3-ketoacid coenzyme A transferase 1, mitochondrial OS	Oxct1	0.811723	4.68363	2.93281	191.48	14.42	1	7	7	12	520	55.953	8.52881
	Q8R429	Sarcoplasmic/endoplasmic reticulum calcium ATPase 1 OS	Atp2a1	1.1562	1.75819	1.09982	346.202	12.78	1	5	12	19	994	109.355	5.22412
	P15535	Beta-1,4-galactosyltransferase 1 OS	B4galt1	1.05935	13.4912	8.38566	102.672	9.52	2	4	4	8	399	44.3829	9.37842
	Q8CHT0	Delta-1-pyrroline-5-carboxylate dehydrogenase, mitochondrial OS	Aldh4a1	0.808317	0.992937	0.614173	73.5016	4.27	1	3	3	4	562	61.8015	8.23584
	Q9WVL0	Maleylacetoacetate isomerase OS	Gstz1	0.631877	0.349278	0.215547	165.827	18.52	1	4	4	9	216	24.2598	7.85498
	Q91XC8	Death-associated protein 1 OS	Dap	0.697636	9.88341	6.08405	105.93	26.47	1	3	3	11	102	11.1477	9.36377
	Q62264	Thyroid hormone-inducible hepatic protein OS	Thrsp	0.493228	1.49417	0.917876	167.61	24	1	3	3	6	150	17.0824	4.98291
	Q61425	Hydroxyacyl-coenzyme A dehydrogenase, mitochondrial OS	Hadh	0.667179	1.11806	0.686118	58.1633	6.69	1	2	2	3	314	34.4419	8.646
	O55137	Acyl-coenzyme A thioesterase 1 OS	Acot1	0.765734	2.08576	1.2638	128.566	17.18	6	7	7	11	419	46.1067	6.58057
	Q9ES97	Reticulon-3 OS	Rtn3	0.68385	3.69531	2.22992	159.29	1.97	2	2	2	10	964	103.814	4.91943
	P19096	Fatty acid synthase OS	Fasn	0.602684	2.47122	1.4579	10554.4	52.36	1	107	107	576	2504	272.257	6.58057
	P14069	Protein S100-A6 OS	S100a6	0.350823	0.24134	0.140553	68.7618	15.73	1	2	2	7	89	10.0443	5.47803
	P05063	Fructose-bisphosphate aldolase C OS	Aldoc	0.89157	10.4331	6.06256	510.267	35.81	2	10	12	24	363	39.3702	7.12256
	Q8BH95	Enoyl-CoA hydratase, mitochondrial OS	Echs1	0.845364	1.01614	0.588887	177.176	22.76	1	6	6	9	290	31.4542	8.48486
	Q91ZJ5	UTP--glucose-1-phosphate uridylyltransferase OS	Ugp2	0.613584	2.13788	1.22788	182.894	11.22	1	6	6	11	508	56.9437	7.60596
	Q62433	Protein NDRG1 OS	Ndrg1	0.832876	3.93394	2.25757	186.91	20.05	1	5	5	8	394	42.9809	6.1001
	Q8CAQ8	MICOS complex subunit Mic60 OS	Immt	0.714427	1.5833	0.880628	74.5233	2.51	1	2	2	4	757	83.8482	6.60986
	O08528	Hexokinase-2 OS	Hk2	0.512887	1.38952	0.769532	155.59	1.2	1	1	1	4	917	102.469	6.11279
	P12382	ATP-dependent 6-phosphofructokinase, liver type OS	Pfkl	0.682944	3.3715	1.86583	584.515	23.97	2	13	16	26	780	85.3054	7.1665
	Q5SWU9	Acetyl-CoA carboxylase 1 OS	Acaca	0.558217	2.17417	1.19391	2922.02	35.48	1	62	74	158	2345	265.088	6.39209
	Q62425	Cytochrome c oxidase subunit NDUFA4 OS	Ndufa4	0.568134	2.79717	1.52517	135.565	56.1	1	6	6	16	82	9.32087	9.5249
	Q922Q1	Mitochondrial amidoxime reducing component 2 OS	Mtarc2	0.771877	2.88763	1.54489	76.88	7.69	1	3	3	4	338	38.1696	8.67529
	Q920E5	Farnesyl pyrophosphate synthase OS	Fdps	0.663769	3.43264	1.81476	41.64	2.27	1	1	1	3	353	40.5557	5.65576
	Q80XN0	D-beta-hydroxybutyrate dehydrogenase, mitochondrial OS	Bdh1	0.683998	15.5798	8.20798	129.467	8.16	1	3	3	6	343	38.2744	9.01221
	Q07417	Short-chain specific acyl-CoA dehydrogenase, mitochondrial OS	Acads	0.724295	1.24346	0.640279	93.5484	3.88	1	2	2	3	412	44.8611	8.47021
	E9Q4Z2	Acetyl-CoA carboxylase 2 OS	Acacb	0.79311	6.03091	2.97533	755.624	8.82	1	9	21	46	2448	275.574	6.31592
	Q60932	Voltage-dependent anion-selective channel protein 1 OS	Vdac1	0.786589	4.75942	2.32668	409.5	30.41	1	6	7	13	296	32.3314	8.42627
	Q60930	Voltage-dependent anion-selective channel protein 2 OS	Vdac2	0.767315	4.28602	2.08004	307.008	27.8	1	7	7	13	295	31.7126	7.48877
	Q62556	Butyrophilin subfamily 1 member A1 OS	Btn1a1	1.49757	24.6678	11.7794	66.4	3.82	1	2	2	5	524	58.3693	5.14795
	Q02862	Alpha-S2-casein-like A OS	Csn1s2a	8.1335	29.3934	10.9096	501.962	42.39	1	8	8	26	184	21.0874	6.68311
	P13516	Acyl-CoA desaturase 1 OS	Scd1	0.300838	1.7556	0.478371	39.0773	6.76	3	2	2	3	355	41.02	9.0708
