# Supplementary material for: Malaria in the postpartum period causes damage to the mammary gland
Source: PLoS One. 2021 Oct 13;16(10):e0258491. doi: 10.1371/journal.pone.0258491 (PMC8513860; doi:10.1371/journal.pone.0258491)
Supplement: S2 Table — The proteome of mammary gland tissues in pregnant mice infected with Pb ANKA on day 5 post-infection was compared with the proteomes in uninfected virgin and pregnant mice, as well as infected virgin and pregnant mice. Proteins showing one or two peptide spectral matches (PSMs) were excluded. Protein levels were normalized to actin, cytoplasmic 1 (Accession: P60710). (XLSX) [file pone.0258491.s005.xlsx]

## Sheet: Table S2
	S2 Table. Comparative proteomic analysis of mammary gland tissue in uninfected or infected pregnant mice.
	Accession	Description	Abbreviation	Infected	Uninfected	Infected	Score	Coverage	# Proteins	# Unique Peptides	# Peptides	# PSMs	# AAs	MW [kDa]	calc. pI
				Virgin	Pregnant	Pregnant
	P19228	Alpha-S1-casein OS	Csn1s1	0.680896	11.6952	19.1591	269.977	15.34	1	4	4	10	313	35.5798	6.29053
	P10598	Beta-casein OS	Csn2	0.5004	6.36502	11.6895	188.803	12.12	1	2	2	6	231	25.3214	6.25244
	Q02862	Alpha-S2-casein-like A OS	Csn1s2a	0.574263	16.686	8.13185	248.935	17.93	1	4	4	11	184	21.0874	6.68311
	P06796	Kappa-casein OS	Csn3	0.642982	3.46881	5.85798	62.66	8.84	1	2	2	5	181	20.0171	4.93213
	P26350	Prothymosin alpha OS	Ptma	0	4.28434	5.07802	534.049	22.52	1	4	4	15	111	12.2471	3.78955
	Q64339	Ubiquitin-like protein ISG15 OS	Isg15	2.96592	1.23194	4.8187	94.4	15.53	1	2	2	4	161	17.8863	7.89893
	P11404	Fatty acid-binding protein, heart OS	Fabp3	0.735972	3.65324	4.62295	220.493	36.84	1	5	5	10	133	14.8097	6.56592
	Q06770	Corticosteroid-binding globulin OS	Serpina6	0.580581	5.8892	4.51214	876.617	28.97	1	10	10	40	397	44.7402	5.23682
	P24369	Peptidyl-prolyl cis-trans isomerase B OS	Ppib	1.00823	3.64814	4.50243	144.56	18.98	1	4	4	5	216	23.6986	9.5542
	Q00898	Alpha-1-antitrypsin 1-5 OS	Serpina1e	1.06603	6.95883	4.39236	839.935	31.72	2	4	10	37	413	45.8625	5.73193
	Q6NZJ6	Eukaryotic translation initiation factor 4 gamma 1 OS	Eif4g1	0.58323	5.5109	3.91747	25.8367	1.06	2	2	2	3	1600	175.967	5.40186
	Q02596	Glycosylation-dependent cell adhesion molecule 1 OS	Glycam1	0.699504	3.2537	3.82629	392.55	32.45	1	3	3	10	151	16.1991	4.55127
	Q9QZ85	Interferon-inducible GTPase 1 OS	Iigp1	3.72007	1.0987	3.80456	196.585	10.9	1	5	5	7	413	47.5415	6.32861
	Q6PDN3	Myosin light chain kinase, smooth muscle OS	Mylk	0.327752	3.00631	3.60896	74.8533	1.24	1	2	2	3	1941	212.792	6.25244
	P54227	Stathmin OS	Stmn1	0.676863	3.27716	3.50383	86.8279	19.46	2	3	3	4	149	17.2639	5.97314
	P47915	60S ribosomal protein L29 OS	Rpl29	0.701637	2.88252	3.33192	166.82	6.88	1	1	1	4	160	17.5759	11.8394
	P17918	Proliferating cell nuclear antigen OS	Pcna	1.05738	2.72981	3.28945	195.8	16.09	1	4	4	8	261	28.7664	4.76709
	P05202	Aspartate aminotransferase, mitochondrial OS	Got2	1.06203	2.39822	3.19769	211.409	8.14	1	3	3	7	430	47.3812	8.99756
	Q64282	Interferon-induced protein with tetratricopeptide repeats 1 OS	Ifit1	1.88149	1.22676	3.11913	40.5688	1.51	1	1	1	3	463	53.7034	7.51807
	P62843	40S ribosomal protein S15 OS	Rps15	0.765324	2.83679	3.10345	73.7726	4.83	1	1	1	9	145	17.0292	10.3892
	P61514	60S ribosomal protein L37a OS	Rpl37a	0.865635	2.63958	3.02123	75.1	16.3	1	2	2	5	92	10.2685	10.4331
	Q19LI2	Alpha-1B-glycoprotein OS	A1bg	1.21435	2.61319	2.94019	330.251	7.81	1	5	5	17	512	56.5176	6.78564
	P50580	Proliferation-associated protein 2G4 OS	Pa2g4	0.895379	2.20407	2.89381	151.81	9.14	1	3	3	5	394	43.6712	6.85889
	P67984	60S ribosomal protein L22 OS	Rpl22	0.981049	2.14229	2.86982	280.72	30.47	1	3	3	6	128	14.7498	9.18799
	P62855	40S ribosomal protein S26 OS	Rps26	0.838127	2.19664	2.86077	144.055	19.13	1	2	2	3	115	13.0071	11.0044
	Q9D8E6	60S ribosomal protein L4 OS	Rpl4	0.932332	2.27165	2.85613	560.789	19.57	1	8	8	20	419	47.124	11.0044
	Q9CQN1	Heat shock protein 75 kDa, mitochondrial OS	Trap1	1.40398	1.31608	2.84098	321.586	7.22	1	4	5	11	706	80.1585	6.68311
	P97311	DNA replication licensing factor MCM6 OS	Mcm6	0.532559	3.41371	2.82636	123.723	4.26	1	4	4	5	821	92.809	5.45264
	Q9CPR4	60S ribosomal protein L17 OS	Rpl17	0.945754	2.23502	2.80583	108.89	22.28	1	4	4	8	184	21.4094	10.1841
	P14869	60S acidic ribosomal protein P0 OS	Rplp0	0.953202	2.01553	2.79638	625.368	34.07	1	9	9	21	317	34.1948	6.25244
	A6X935	Inter alpha-trypsin inhibitor, heavy chain 4 OS	Itih4	0.986088	2.73734	2.78921	812.931	16.77	1	14	14	34	942	104.594	6.40479
	P14115	60S ribosomal protein L27a OS	Rpl27a	1.04164	2.29898	2.76568	386.053	34.46	1	5	5	15	148	16.595	11.1216
	P47963	60S ribosomal protein L13 OS	Rpl13	0.923128	2.29371	2.75799	375.01	23.7	1	5	5	11	211	24.2905	11.5464
	Q6ZWV7	60S ribosomal protein L35 OS	Rpl35	0.857254	2.03876	2.72179	255.643	13.82	1	2	2	7	123	14.5436	11.0483
	P42703	Leukemia inhibitory factor receptor OS	Lifr	0.946652	2.72358	2.6812	110.558	3.02	1	3	3	6	1092	122.497	6.03662
	O09167	60S ribosomal protein L21 OS	Rpl21	0.977234	2.08405	2.65741	142.44	20.63	1	3	3	4	160	18.5501	10.4917
	P62281	40S ribosomal protein S11 OS	Rps11	0.977023	2.05254	2.64758	158.948	20.89	1	3	3	9	158	18.419	10.3013
	Q9Z0E6	Interferon-induced guanylate-binding protein 2 OS	Gbp2	2.94697	1.01443	2.63293	271.075	10.36	2	5	5	9	589	66.6972	5.70654
	Q78PY7	Staphylococcal nuclease domain-containing protein 1 OS	Snd1	0.241055	2.04095	2.63098	82.5267	2.64	1	2	2	3	910	102.025	7.43018
	P53026	60S ribosomal protein L10a OS	Rpl10a	0.898112	2.00556	2.62874	177.032	15.21	1	3	3	7	217	24.9006	9.979
	P14131	40S ribosomal protein S16 OS	Rps16	0.823811	2.16515	2.61819	405.749	47.95	1	8	8	17	146	16.435	10.2134
	Q9CR57	60S ribosomal protein L14 OS	Rpl14	0.9436	1.97897	2.60518	602.33	15.67	1	3	3	12	217	23.5492	11.019
	Q61881	DNA replication licensing factor MCM7 OS	Mcm7	0.450459	2.64874	2.60454	45.3111	3.2	1	3	3	3	719	81.1595	6.3667
	Q9D1R9	60S ribosomal protein L34 OS	Rpl34	0.799048	2.22427	2.57145	214.36	23.08	1	4	4	10	117	13.2844	11.4731
	P62830	60S ribosomal protein L23 OS	Rpl23	0.87781	1.92659	2.55881	341.727	33.57	1	5	5	12	140	14.8561	10.5063
	P62267	40S ribosomal protein S23 OS	Rps23	0.816827	2.00565	2.52952	235.5	30.07	1	4	4	8	143	15.7977	10.4917
	P62754	40S ribosomal protein S6 OS	Rps6	0.855757	2.02964	2.52114	448.781	20.88	1	6	6	18	249	28.663	10.8433
	P10126	Elongation factor 1-alpha 1 OS	Eef1a1	0.81349	2.17574	2.52013	822.349	24.46	2	10	10	39	462	50.0821	9.01221
	P47911	60S ribosomal protein L6 OS	Rpl6	0.896191	2.08449	2.5194	367.765	27.03	1	8	8	17	296	33.4889	10.6968
	Q9CZM2	60S ribosomal protein L15 OS	Rpl15	0.87369	2.52912	2.50998	219.11	31.86	1	6	6	10	204	24.1311	11.6196
	P68372	Tubulin beta-4B chain OS	Tubb4b	0.949955	2.21761	2.46892	1673.93	56.85	3	2	19	67	445	49.799	4.89404
	P62717	60S ribosomal protein L18a OS	Rpl18a	0.933288	1.93611	2.45451	300.21	21.59	1	4	4	10	176	20.7189	10.7114
	Q60817	Nascent polypeptide-associated complex subunit alpha OS	Naca	0.826229	2.01364	2.44448	139.127	22.79	2	4	4	7	215	23.3697	4.56396
	P62317	Small nuclear ribonucleoprotein Sm D2 OS	Snrpd2	0.993781	2.0818	2.43912	132.12	16.1	1	2	2	5	118	13.5182	9.90576
	P62301	40S ribosomal protein S13 OS	Rps13	0.915036	1.92116	2.43755	509.308	45.03	1	8	8	26	151	17.2117	10.5356
	P12970	60S ribosomal protein L7a OS	Rpl7a	0.921976	2.05974	2.42907	631.903	31.58	1	10	10	25	266	29.958	10.5649
	P62960	Nuclease-sensitive element-binding protein 1 OS	Ybx1	0.101033	1.84114	2.41316	86.4467	4.66	1	1	1	3	322	35.7086	9.87646
	P99024	Tubulin beta-5 chain OS	Tubb5	0.904679	2.18519	2.41092	1834.28	56.98	2	3	19	72	444	49.639	4.89404
	Q60865	Caprin-1 OS	Caprin1	0	1.88513	2.41029	32.95	1.98	1	2	2	3	707	78.1208	5.24951
	P62264	40S ribosomal protein S14 OS	Rps14	0.891936	1.99674	2.40313	159.804	36.42	1	4	4	7	151	16.2625	10.0522
	P86048	60S ribosomal protein L10-like OS	Rpl10l	0.808149	2.10692	2.39458	117.419	9.81	2	2	2	11	214	24.5419	10.1108
	P41105	60S ribosomal protein L28 OS	Rpl28	0.783752	1.91924	2.36675	148.477	25.55	1	5	5	8	137	15.7237	12.0151
	P62900	60S ribosomal protein L31 OS	Rpl31	0.910248	1.93521	2.35978	163.955	12.8	1	2	2	8	125	14.4539	10.5356
	Q07797	Galectin-3-binding protein OS	Lgals3bp	1.5958	1.291	2.33381	172.003	10.57	1	4	4	6	577	64.4496	5.13525
	P62849	40S ribosomal protein S24 OS	Rps24	1.12558	1.72295	2.31377	129.547	28.57	1	3	3	6	133	15.4134	10.7847
	Q9CZX8	40S ribosomal protein S19 OS	Rps19	0.902544	2.21432	2.29982	427.335	40	1	8	8	18	145	16.0756	10.4038
	P62852	40S ribosomal protein S25 OS	Rps25	0.881957	2.0632	2.29499	143.817	28	1	4	4	6	125	13.7337	10.1108
	P42225	Signal transducer and activator of transcription 1 OS	Stat1	1.74163	1.05853	2.28138	212.329	14.29	1	12	12	18	749	87.1421	5.57959
	Q6ZWX6	Eukaryotic translation initiation factor 2 subunit 1 OS	Eif2s1	0.705335	2.1121	2.27802	141.61	8.57	1	3	3	4	315	36.0854	5.08447
	P68040	Guanine nucleotide-binding protein subunit beta-2-like 1 OS	Gnb2l1	0.902857	1.94139	2.27361	581.691	33.75	1	11	11	28	317	35.0546	7.69385
	P63325	40S ribosomal protein S10 OS	Rps10	0.924752	2.47111	2.27099	162.611	25.45	1	4	4	8	165	18.9038	10.1548
	P62918	60S ribosomal protein L8 OS	Rpl8	0.836961	1.97425	2.26601	197.664	22.18	1	6	6	11	257	28.0073	11.0337
	Q6ZWN5	40S ribosomal protein S9 OS	Rps9	0.947978	1.87516	2.25707	389.95	42.27	1	10	10	24	194	22.5776	10.6528
	P62242	40S ribosomal protein S8 OS	Rps8	0.87503	1.88815	2.25574	250.685	30.77	1	5	5	8	208	24.1902	10.3159
	Q62093	Serine/arginine-rich splicing factor 2 OS	Srsf2	0.73232	2.10812	2.25322	66.98	7.24	1	2	2	5	221	25.4612	11.854
	Q9D8N0	Elongation factor 1-gamma OS	Eef1g	0.928799	1.75721	2.24425	467.891	20.37	1	10	10	25	437	50.0292	6.7417
	Q9Z1Q9	Valine--tRNA ligase OS	Vars	0.946491	1.7848	2.23514	233.906	7.6	1	9	9	10	1263	140.127	7.76709
	O08756	3-hydroxyacyl-CoA dehydrogenase type-2 OS	Hsd17b10	1.14439	1.69329	2.22655	93.9233	11.11	1	2	2	3	261	27.4016	8.41162
	P35979	60S ribosomal protein L12 OS	Rpl12	0.859136	1.72519	2.22507	194.866	15.15	1	2	2	5	165	17.7935	9.42236
	P61358	60S ribosomal protein L27 OS	Rpl27	0.845925	2.05011	2.224	121.245	26.47	1	4	4	8	136	15.7877	10.5649
	Q99L45	Eukaryotic translation initiation factor 2 subunit 2 OS	Eif2s2	0.833402	1.78525	2.22328	113.53	10.88	1	4	4	5	331	38.0682	5.79541
	O70251	Elongation factor 1-beta OS	Eef1b	0.90815	1.9207	2.21447	220.524	19.56	1	4	4	7	225	24.6782	4.69092
	P63276	40S ribosomal protein S17 OS	Rps17	1.00588	1.89925	2.21403	81.0067	22.96	1	3	3	4	135	15.5144	9.84717
	Q99K85	Phosphoserine aminotransferase OS	Psat1	0.922139	1.7556	2.20453	97.28	6.22	1	2	2	3	370	40.4467	8.03076
	P25444	40S ribosomal protein S2 OS	Rps2	0.893463	1.83326	2.20179	655.331	41.64	1	12	12	30	293	31.2117	10.2427
	Q99020	Heterogeneous nuclear ribonucleoprotein A/B OS	Hnrnpab	0.860379	2.17253	2.1928	419.838	18.6	1	4	5	13	285	30.8123	7.91357
	P35980	60S ribosomal protein L18 OS	Rpl18	0.836332	2.23231	2.19264	212.113	34.04	1	6	6	10	188	21.6312	11.7808
	O08638	Myosin-11 OS	Myh11	0.734799	1.84784	2.18286	1270.21	16.28	2	14	29	51	1972	226.888	5.45264
	Q3TWW8	Serine/arginine-rich splicing factor 6 OS	Srsf6	0.889247	2.07987	2.17806	144.006	4.13	2	2	2	6	339	39.0021	11.4585
	P14206	40S ribosomal protein SA OS	Rpsa	0.920528	1.68662	2.17756	348.644	47.46	1	9	9	12	295	32.8174	4.86865
	P62270	40S ribosomal protein S18 OS	Rps18	0.790317	1.85888	2.16758	527.672	35.53	1	7	7	21	152	17.7079	10.9897
	P28656	Nucleosome assembly protein 1-like 1 OS	Nap1l1	0.87805	1.80435	2.16747	170.04	9.97	2	3	3	4	391	45.3169	4.4624
	Q9CY27	Very-long-chain enoyl-CoA reductase OS	Tecr	1.1382	1.57385	2.1672	100.792	5.52	1	2	2	5	308	36.0668	9.5542
	Q9CXW4	60S ribosomal protein L11 OS	Rpl11	0.920262	1.70957	2.16458	136.542	24.72	1	5	5	8	178	20.2396	9.59814
	P09405	Nucleolin OS	Ncl	0.832416	2.17384	2.16286	1130.92	24.19	1	19	19	48	707	76.6768	4.75439
	P97351	40S ribosomal protein S3a OS	Rps3a	0.815466	1.75247	2.16255	335.11	27.27	1	8	8	18	264	29.8657	9.72998
	P62889	60S ribosomal protein L30 OS	Rpl30	0.655308	1.86805	2.15307	157.077	39.13	1	4	4	6	115	12.7757	9.62744
	P62908	40S ribosomal protein S3 OS	Rps3	0.904819	1.81783	2.13288	630.675	41.15	1	12	12	32	243	26.6574	9.65674
	P27659	60S ribosomal protein L3 OS	Rpl3	0.889125	1.73061	2.1251	221.645	11.66	1	6	6	15	403	46.0808	10.2134
	P68368	Tubulin alpha-4A chain OS	Tuba4a	0.954449	1.72344	2.12051	1728.55	45.76	2	3	16	74	448	49.8924	5.05908
	P63028	Translationally-controlled tumor protein OS	Tpt1	0.915685	1.66298	2.1169	218.763	23.26	1	3	3	7	172	19.4496	4.85596
	Q9CQS8	Protein transport protein Sec61 subunit beta OS	Sec61b	0.988839	1.66558	2.11516	250.204	55.21	1	3	3	7	96	9.9521	11.561
	P21958	Antigen peptide transporter 1 OS	Tap1	1.60941	1.02131	2.11233	69.12	3.87	1	2	2	4	724	78.814	8.79248
	P62082	40S ribosomal protein S7 OS	Rps7	0.934038	1.75777	2.11166	349.078	40.21	1	7	7	16	194	22.1133	10.0962
	P51410	60S ribosomal protein L9 OS	Rpl9	0.901194	1.63361	2.1093	188.733	15.63	1	3	3	6	192	21.8678	9.94971
	P99027	60S acidic ribosomal protein P2 OS	Rplp2	0.91335	1.85778	2.10451	217.202	38.26	1	3	3	6	115	11.6438	4.53857
	Q99MN1	Lysine--tRNA ligase OS	Kars	0.861901	1.73624	2.09808	131.975	8.57	1	5	5	7	595	67.7965	5.93506
	P62245	40S ribosomal protein S15a OS	Rps15a	0.887793	1.66606	2.09448	219.006	36.15	1	5	5	13	130	14.83	10.1255
	P63242	Eukaryotic translation initiation factor 5A-1 OS	Eif5a	0.974207	1.7724	2.07671	336.401	40.91	2	6	6	14	154	16.8214	5.23682
	P62751	60S ribosomal protein L23a OS	Rpl23a	0.878833	2.06293	2.07638	82.3469	17.95	1	3	3	3	156	17.6841	10.4478
	Q8BL97	Serine/arginine-rich splicing factor 7 OS	Srsf7	0.891159	1.86086	2.07399	157.46	13.11	2	3	3	5	267	30.7988	11.8979
	Q9EST5	Acidic leucine-rich nuclear phosphoprotein 32 family member B OS	Anp32b	0.827099	1.99109	2.06575	183.54	13.6	3	4	4	12	272	31.0601	4.00537
	P62702	40S ribosomal protein S4, X isoform OS	Rps4x	0.876009	1.84949	2.05969	369.75	31.94	1	9	9	19	263	29.5791	10.1548
	P19253	60S ribosomal protein L13a OS	Rpl13a	0.889785	1.72218	2.03619	304.467	34.98	1	8	8	13	203	23.4493	11.019
	P53996	Cellular nucleic acid-binding protein OS	Cnbp	0.53819	1.81943	2.02336	212.386	26.4	1	4	4	6	178	19.5786	7.57666
	Q9CQR2	40S ribosomal protein S21 OS	Rps21	0.774877	1.85602	2.02295	86.4267	22.89	1	2	2	3	83	9.13555	8.51416
	Q99KP6	Pre-mRNA-processing factor 19 OS	Prpf19	0.900315	1.64266	2.02024	94.8067	7.14	1	3	3	7	504	55.2044	6.60986
	P58252	Elongation factor 2 OS	Eef2	0.957599	1.82428	2.00896	2094.1	42.19	1	30	31	88	858	95.2529	6.82959
	Q9R233	Tapasin OS	Tapbp	1.62777	1.18268	2.00873	194.697	12.47	1	4	4	6	465	49.7051	8.49951
	P49312	Heterogeneous nuclear ribonucleoprotein A1 OS	Hnrnpa1	0.791822	1.815	2.00289	967.889	37.81	1	7	11	36	320	34.1753	9.23193
	Q7TMK9	Heterogeneous nuclear ribonucleoprotein Q OS	Syncrip	0.92755	1.72109	1.98756	518.505	18.78	1	9	9	16	623	69.5896	8.5874
	Q9EQU5	Protein SET OS	Set	0.827261	1.95601	1.979	287.05	18.34	1	4	4	8	289	33.3577	4.32275
	Q9R0Q7	Prostaglandin E synthase 3 OS	Ptges3	0.940176	1.79325	1.97851	192.406	31.25	1	5	5	10	160	18.7094	4.55127
	Q60932	Voltage-dependent anion-selective channel protein 1 OS	Vdac1	1.31824	1.62366	1.97383	598.895	27.36	1	6	7	16	296	32.3314	8.42627
	Q8BU30	Isoleucine--tRNA ligase, cytoplasmic OS	Iars	0.688493	1.7014	1.96401	184.945	4.12	1	5	5	8	1262	144.179	6.55127
	Q61656	Probable ATP-dependent RNA helicase DDX5 OS	Ddx5	0.822724	1.54969	1.96344	319.095	16.29	1	5	10	15	614	69.2468	8.92432
	P24547	Inosine-5'-monophosphate dehydrogenase 2 OS	Impdh2	0.992636	1.57915	1.96099	63.0789	3.7	1	2	2	3	514	55.7798	7.28369
	Q9CZU6	Citrate synthase, mitochondrial OS	Cs	1.00748	1.96112	1.96016	663.64	20.04	1	9	9	27	464	51.7034	8.57275
	P61620	Protein transport protein Sec61 subunit alpha isoform 1 OS	Sec61a1	0.944658	1.72834	1.94959	67.76	4.2	2	2	2	3	476	52.2305	8.06006
	Q7TQI3	Ubiquitin thioesterase OTUB1 OS	Otub1	0.945142	1.16173	1.93359	74.0067	12.55	1	3	3	4	271	31.2504	4.94482
	Q6Q899	Probable ATP-dependent RNA helicase DDX58 OS	Ddx58	1.27747	1.29456	1.92543	104.754	2.59	1	3	3	5	926	105.908	6.65381
	P50431	Serine hydroxymethyltransferase, cytosolic OS	Shmt1	0.792575	2.34492	1.92049	27.52	1.88	1	1	1	3	478	52.5675	6.94678
	P97461	40S ribosomal protein S5 OS	Rps5	0.678964	1.70058	1.91437	161.948	19.12	1	5	5	9	204	22.875	9.71533
	P00920	Carbonic anhydrase 2 OS	Ca2	0.811854	1.08834	1.91392	582.949	31.92	1	6	6	16	260	29.0145	7.00537
	Q99JY9	Actin-related protein 3 OS	Actr3	1.14509	1.78731	1.9098	192.457	9.57	1	4	4	6	418	47.327	5.88428
	Q91YR7	Pre-mRNA-processing factor 6 OS	Prpf6	0.134025	1.63318	1.9052	110.383	2.34	1	2	2	3	941	106.655	8.08936
	Q61937	Nucleophosmin OS	Npm1	0.822863	1.90302	1.90298	413.512	24.66	1	7	7	22	292	32.5398	4.76709
	P29341	Polyadenylate-binding protein 1 OS	Pabpc1	0.93284	1.50142	1.89209	527.176	14.31	1	8	8	20	636	70.6259	9.49561
	P30416	Peptidyl-prolyl cis-trans isomerase FKBP4 OS	Fkbp4	0.89826	1.77991	1.88975	309.531	8.73	1	4	4	11	458	51.5399	5.71924
	P63323	40S ribosomal protein S12 OS	Rps12	0.888566	1.5056	1.88826	351.98	29.55	1	5	5	16	132	14.5156	7.23975
	P60843	Eukaryotic initiation factor 4A-I OS	Eif4a1	0.938275	1.68215	1.88061	632.239	34.98	2	11	13	29	406	46.1246	5.47803
	Q8VIJ6	Splicing factor, proline- and glutamine-rich OS	Sfpq	0.754085	1.99942	1.87227	565.728	10.3	1	5	5	18	699	75.3943	9.43701
	Q9CPY7	Cytosol aminopeptidase OS	Lap3	1.09016	1.33283	1.86801	465.46	23.51	1	10	10	15	519	56.1058	7.72314
	Q60864	Stress-induced-phosphoprotein 1 OS	Stip1	1.13586	1.70704	1.86223	119.598	7.18	1	4	4	7	543	62.5424	6.80029
	Q62448	Eukaryotic translation initiation factor 4 gamma 2 OS	Eif4g2	0.586561	1.49668	1.8584	93.61	2.43	1	2	2	3	906	102.041	7.13721
	P14148	60S ribosomal protein L7 OS	Rpl7	1.00022	1.72597	1.8563	284.82	28.15	1	8	8	16	270	31.3998	10.8872
	P62911	60S ribosomal protein L32 OS	Rpl32	0.917111	1.9056	1.84809	30.83	16.3	1	3	3	3	135	15.8498	11.3267
	Q99PL5	Ribosome-binding protein 1 OS	Rrbp1	0.642846	1.59843	1.83243	374.433	4.8	1	7	7	13	1605	172.776	9.33447
	Q8R1B4	Eukaryotic translation initiation factor 3 subunit C OS	Eif3c	0.785984	1.53999	1.83077	328.274	7.35	1	5	5	9	911	105.465	5.78271
	P32921	Tryptophan--tRNA ligase, cytoplasmic OS	Wars	1.46707	1.16575	1.82928	107.11	2.49	1	1	1	4	481	54.3231	6.88818
	Q99LT0	Protein dpy-30 homolog OS	Dpy30	1.07017	1.4192	1.82872	31.93	36.36	1	2	2	3	99	11.2058	4.88135
	P34022	Ran-specific GTPase-activating protein OS	Ranbp1	0.886142	1.59277	1.82545	201.71	13.3	1	3	3	6	203	23.5817	5.22412
	P05784	Keratin, type I cytoskeletal 18 OS	Krt18	0.819054	2.03016	1.82266	232.123	10.17	12	1	4	12	423	47.5092	5.32568
	P11499	Heat shock protein HSP 90-beta OS	Hsp90ab1	0.96557	1.53161	1.82112	2745.93	37.29	1	17	27	109	724	83.2291	5.03369
	Q9JM76	Actin-related protein 2/3 complex subunit 3 OS	Arpc3	1.19667	1.59825	1.81236	123.043	7.3	1	1	1	3	178	20.5113	8.5874
	O54974	Galectin-7 OS	Lgals7	0.747308	1.98868	1.80381	111.72	33.82	1	3	3	4	136	15.1638	7.25439
	Q8JZQ9	Eukaryotic translation initiation factor 3 subunit B OS	Eif3b	0.871285	1.67626	1.8036	215.5	6.72	1	5	5	6	803	91.3131	5.021
	O54734	Dolichyl-diphosphooligosaccharide--protein glycosyltransferase 48 kDa subunit OS	Ddost	0.951808	1.37987	1.79346	170.657	12.93	1	5	5	9	441	48.997	5.8335
	Q61990	Poly(rC)-binding protein 2 OS	Pcbp2	1.00417	1.57649	1.79099	618.95	24.59	3	4	8	21	362	38.1974	6.78564
	Q6IRU2	Tropomyosin alpha-4 chain OS	Tpm4	0.804559	1.51114	1.79078	271.039	18.95	1	5	6	10	248	28.4504	4.67822
	P84099	60S ribosomal protein L19 OS	Rpl19	0.889791	1.6844	1.78657	104.278	17.35	1	4	4	4	196	23.4512	11.4731
	Q9Z204	Heterogeneous nuclear ribonucleoproteins C1/C2 OS	Hnrnpc	0.794109	1.62585	1.7823	206.16	13.74	1	5	5	8	313	34.3639	5.04639
	P57776	Elongation factor 1-delta OS	Eef1d	0.904924	1.70369	1.77921	144.88	11.03	1	3	3	6	281	31.2739	5.021
	Q99KF1	Transmembrane emp24 domain-containing protein 9 OS	Tmed9	1.23909	1.29789	1.77401	83.2831	13.62	1	2	2	4	235	27.1101	8.41162
	Q61147	Ceruloplasmin OS	Cp	0.927762	1.37999	1.77397	924.013	24.79	1	20	20	34	1061	121.074	5.84619
	P62897	Cytochrome c, somatic OS	Cycs	1.40067	1.5199	1.7722	159.621	31.43	2	4	4	8	105	11.598	9.5835
	Q3U5Q7	UMP-CMP kinase 2, mitochondrial OS	Cmpk2	0.0479641	0.887247	1.7692	78.4167	2.01	1	1	1	3	447	50.0047	7.26904
	Q00PI9	Heterogeneous nuclear ribonucleoprotein U-like protein 2 OS	Hnrnpul2	1.01826	1.68725	1.76153	257.15	8.32	1	4	4	5	745	84.8878	4.89404
	P80316	T-complex protein 1 subunit epsilon OS	Cct5	0.96665	1.70633	1.75891	193.727	11.65	1	5	5	9	541	59.5859	6.02393
	Q64345	Interferon-induced protein with tetratricopeptide repeats 3 OS	Ifit3	1.21527	1.02629	1.75491	139.946	7.2	1	3	3	5	403	47.1923	5.64307
	Q8CIE6	Coatomer subunit alpha OS	Copa	0.959982	1.63221	1.75194	193.34	8.09	1	9	9	11	1224	138.344	7.6499
	Q6PDM2	Serine/arginine-rich splicing factor 1 OS	Srsf1	0.374432	1.6095	1.74548	182.915	11.69	1	4	4	8	248	27.7278	10.3599
	Q60930	Voltage-dependent anion-selective channel protein 2 OS	Vdac2	1.36714	1.44519	1.74036	195.065	28.14	1	6	6	8	295	31.7126	7.48877
	P04919	Band 3 anion transport protein OS	Slc4a1	0.715677	1.03612	1.73722	53.55	3.23	1	3	3	3	929	103.07	5.45264
	Q922Q8	Leucine-rich repeat-containing protein 59 OS	Lrrc59	0.914101	1.4182	1.73609	99.99	11.07	1	2	2	4	307	34.8558	9.5249
	P51881	ADP/ATP translocase 2 OS	Slc25a5	1.26022	1.53592	1.73576	706.047	37.58	2	5	11	35	298	32.9102	9.72998
	P60229	Eukaryotic translation initiation factor 3 subunit E OS	Eif3e	0.923123	1.5725	1.73548	133.031	6.07	1	4	4	9	445	52.1874	6.03662
	P08113	Endoplasmin OS	Hsp90b1	0.906003	1.52176	1.73457	2051.15	32.92	1	26	27	82	802	92.4183	4.81787
	Q8BMK4	Cytoskeleton-associated protein 4 OS	Ckap4	0.700205	1.82212	1.73364	231.79	9.91	1	3	3	5	575	63.6536	5.64307
	Q8VEK3	Heterogeneous nuclear ribonucleoprotein U OS	Hnrnpu	0.951321	1.6442	1.73149	714.459	15.38	1	12	12	33	800	87.8627	6.23975
	P0CG49	Polyubiquitin-B OS	Ubb	1.13546	1.22885	1.72434	439.417	56.39	4	4	4	17	305	34.3475	7.53271
	P11983	T-complex protein 1 subunit alpha OS	Tcp1	0.938341	1.62521	1.72211	302.435	17.63	1	9	9	13	556	60.4107	6.16357
	P62965	Cellular retinoic acid-binding protein 1 OS	Crabp1	0.123831	1.37404	1.71289	200.267	14.6	2	2	2	6	137	15.5818	5.37646
	P59999	Actin-related protein 2/3 complex subunit 4 OS	Arpc4	1.12274	1.53665	1.7127	147.867	16.07	1	3	3	6	168	19.6543	8.42627
	P80315	T-complex protein 1 subunit delta OS	Cct4	0.73905	1.61973	1.70989	360.388	24.12	1	12	12	19	539	58.0297	8.01611
	P60335	Poly(rC)-binding protein 1 OS	Pcbp1	0.959275	1.48339	1.709	716.92	29.78	2	6	10	26	356	37.4739	7.09326
	O55142	60S ribosomal protein L35a OS	Rpl35a	0.783786	1.91598	1.70157	104.384	33.64	1	5	5	9	110	12.5457	10.8872
	O55029	Coatomer subunit beta' OS	Copb2	0.96422	1.53067	1.70143	110.521	7.18	1	5	5	7	905	102.384	5.30029
	Q8CGC7	Bifunctional glutamate/proline--tRNA ligase OS	Eprs	0.978176	1.90155	1.69952	147.148	4.17	1	6	6	8	1512	169.972	7.66455
	P58774	Tropomyosin beta chain OS	Tpm2	0.676511	2.07622	1.69584	485.635	20.77	1	2	7	18	284	32.8166	4.70361
	P61327	Protein mago nashi homolog OS	Magoh	0.953071	1.31163	1.69513	50.29	23.97	2	2	2	3	146	17.1528	6.11279
	Q00915	Retinol-binding protein 1 OS	Rbp1	0.308633	1.81987	1.69188	346.654	27.41	1	4	4	11	135	15.8358	5.24951
	Q4KML4	Costars family protein ABRACL OS	Abracl	1.17279	2.11203	1.68532	94.93	27.16	1	2	2	3	81	9.02481	5.79541
	Q9CPW4	Actin-related protein 2/3 complex subunit 5 OS	Arpc5	1.30851	1.41314	1.68524	154.799	32.45	1	3	3	4	151	16.2783	5.66846
	Q00519	Xanthine dehydrogenase/oxidase OS	Xdh	1.49118	1.20189	1.68355	287.745	8.09	4	9	9	16	1335	146.468	7.56201
	P10853	Histone H2B type 1-F/J/L OS	Hist1h2bf	0.931433	1.93618	1.68119	72.8673	19.05	12	2	2	3	126	13.9276	10.3159
	P08071	Lactotransferrin OS	Ltf	0.563918	0.372857	1.67957	199.08	7.36	1	3	4	12	707	77.788	8.52881
	Q8CGP6	Histone H2A type 1-H OS	Hist1h2ah	0.922789	2.06284	1.67896	123.583	35.16	12	3	3	5	128	13.9418	11.0337
	Q9CVB6	Actin-related protein 2/3 complex subunit 2 OS	Arpc2	1.23445	1.54556	1.67842	172.131	6	1	2	2	6	300	34.3355	7.35693
	Q9DBG6	Dolichyl-diphosphooligosaccharide--protein glycosyltransferase subunit 2 OS	Rpn2	1.07797	1.33465	1.67611	260.125	12.68	1	5	5	8	631	69.02	5.80811
	Q61646	Haptoglobin OS	Hp	2.56551	0.744196	1.67495	136.1	12.1	3	4	4	8	347	38.7275	6.29053
	P80317	T-complex protein 1 subunit zeta OS	Cct6a	0.863602	1.58573	1.67447	449.154	18.46	2	9	9	20	531	57.9677	7.07861
	Q64012	RNA-binding protein Raly OS	Raly	0.79905	1.45389	1.67052	108.389	8.97	1	3	3	5	312	33.1678	8.83643
	Q80SU7	Interferon-induced very large GTPase 1 OS	Gvin1	0	0.779657	1.66941	77.6326	0.82	1	2	2	3	2427	280.637	6.56592
	P54775	26S protease regulatory subunit 6B OS	Psmc4	0.997442	1.49675	1.66888	212.187	15.55	1	5	5	9	418	47.3786	5.21143
	P62309	Small nuclear ribonucleoprotein G OS	Snrpg	0.52639	1.4539	1.66872	37.9767	25	1	2	2	3	76	8.49043	8.88037
	Q60668	Heterogeneous nuclear ribonucleoprotein D0 OS	Hnrnpd	0.992206	1.55625	1.66138	455.257	14.37	2	4	5	12	355	38.3303	7.81104
	Q9EQH2	Endoplasmic reticulum aminopeptidase 1 OS	Erap1	1.15294	1.02534	1.66095	96.43	3.87	1	3	3	6	930	106.531	6.20166
	Q8JZN5	Acyl-CoA dehydrogenase family member 9, mitochondrial OS	Acad9	0.904907	1.48952	1.66069	63.0008	6.24	1	4	4	4	625	68.6787	7.45947
	P42932	T-complex protein 1 subunit theta OS	Cct8	0.910002	1.67159	1.65559	253.17	18.98	1	9	9	11	548	59.5175	5.61768
	O35841	Apoptosis inhibitor 5 OS	Api5	0.873155	1.55593	1.65397	113.011	4.37	1	2	2	3	504	56.7498	5.92236
	P32067	Lupus La protein homolog OS	Ssb	1.04168	1.71765	1.65278	106.329	11.81	1	4	4	7	415	47.727	9.77393
	P80313	T-complex protein 1 subunit eta OS	Cct7	0.843736	1.59421	1.64794	246.285	12.87	1	6	6	10	544	59.6141	7.84033
	Q9JMA1	Ubiquitin carboxyl-terminal hydrolase 14 OS	Usp14	0.768547	1.41851	1.64785	229.28	12.58	1	6	6	9	493	55.966	5.23682
	Q60931	Voltage-dependent anion-selective channel protein 3 OS	Vdac3	1.36484	1.64164	1.6429	417.62	22.97	1	4	5	11	283	30.7334	8.79248
	P62307	Small nuclear ribonucleoprotein F OS	Snrpf	0	1.50621	1.64229	132.97	15.12	1	1	1	3	86	9.71878	4.66553
	P62196	26S protease regulatory subunit 8 OS	Psmc5	1.011	1.50457	1.63738	243.463	12.81	1	3	4	6	406	45.5971	7.54736
	Q9D1L0	Coiled-coil-helix-coiled-coil-helix domain-containing protein 2, mitochondrial OS	Chchd2	1.25051	1.51373	1.6357	121.107	15.69	1	1	1	3	153	15.6508	9.65674
	P15532	Nucleoside diphosphate kinase A OS	Nme1	1.04386	1.60381	1.63065	642.805	43.42	1	2	6	31	152	17.1969	7.37158
	Q9WV32	Actin-related protein 2/3 complex subunit 1B OS	Arpc1b	0.92709	1.61166	1.62974	44.03	5.91	1	3	3	4	372	41.0375	8.35303
	P26231	Catenin alpha-1 OS	Ctnna1	0.845722	1.48642	1.62889	74.9089	3.97	2	4	4	4	906	100.044	6.22705
	Q9R0P5	Destrin OS	Dstn	0.751893	1.64275	1.62781	453.23	43.64	1	6	7	20	165	18.5095	7.97217
	P04186	Complement factor B OS	Cfb	1.08795	0.841957	1.62547	81.42	3.02	1	2	2	3	761	84.9505	7.37158
	P46978	Dolichyl-diphosphooligosaccharide--protein glycosyltransferase subunit STT3A OS	Stt3a	0.779041	1.58382	1.6234	101.13	2.27	1	2	2	5	705	80.5449	8.104
	P61804	Dolichyl-diphosphooligosaccharide--protein glycosyltransferase subunit DAD1 OS	Dad1	0.931108	1.29352	1.61411	44	19.47	1	2	2	3	113	12.4886	7.07861
	P57759	Endoplasmic reticulum resident protein 29 OS	Erp29	1.18324	1.30831	1.61283	74.48	7.25	1	2	2	3	262	28.8051	6.15088
	Q01768	Nucleoside diphosphate kinase B OS	Nme2	0.989981	1.38671	1.61086	468.723	63.82	1	4	8	30	152	17.3519	7.50342
	Q921M3	Splicing factor 3B subunit 3 OS	Sf3b3	0.991111	1.55206	1.60817	178.513	3.12	1	4	4	6	1217	135.465	5.26221
	P17665	Cytochrome c oxidase subunit 7C, mitochondrial OS	Cox7c	1.05435	1.47446	1.60632	179.847	28.57	1	2	2	7	63	7.32788	11.0044
	Q91WK2	Eukaryotic translation initiation factor 3 subunit H OS	Eif3h	0.835863	1.37645	1.60542	151.27	8.24	1	2	2	4	352	39.807	6.66846
	Q62167	ATP-dependent RNA helicase DDX3X OS	Ddx3x	0.908254	1.34055	1.59914	330.443	16.01	3	9	9	12	662	73.056	7.18115
	Q91YQ5	Dolichyl-diphosphooligosaccharide--protein glycosyltransferase subunit 1 OS	Rpn1	0.907594	1.31129	1.59824	449.321	17.27	1	10	10	17	608	68.4857	6.45557
	P49182	Heparin cofactor 2 OS	Serpind1	0.929416	1.29322	1.59771	29.1517	6.9	1	3	3	3	478	54.462	7.34229
	Q61171	Peroxiredoxin-2 OS	Prdx2	0.83578	1.24446	1.59655	725.263	39.39	1	8	8	28	198	21.7651	5.41455
	Q9JIF7	Coatomer subunit beta OS	Copb1	0.952325	1.42836	1.59508	250.141	8.6	1	8	8	9	953	106.998	5.99854
	O70133	ATP-dependent RNA helicase A OS	Dhx9	0.83017	1.5916	1.59256	155.222	5.14	1	7	7	11	1380	149.381	6.82959
	Q9CWK8	Sorting nexin-2 OS	Snx2	1.04298	1.07843	1.58942	161.81	9.44	1	3	4	5	519	58.4348	5.12256
	Q8CHP8	Phosphoglycolate phosphatase OS	Pgp	0.98067	1.40184	1.5891	154.31	6.23	1	2	2	4	321	34.5187	5.35107
	P10107	Annexin A1 OS	Anxa1	1.42716	1.27829	1.58788	270.018	22.25	3	8	8	11	346	38.71	7.37158
	Q78IK2	Up-regulated during skeletal muscle growth protein 5 OS	Usmg5	1.26691	1.24201	1.58628	231.589	43.1	1	2	2	7	58	6.37736	9.83252
	P23116	Eukaryotic translation initiation factor 3 subunit A OS	Eif3a	0.876455	1.71589	1.58473	268.677	8.04	1	12	12	18	1344	161.838	6.771
	P63017	Heat shock cognate 71 kDa protein OS	Hspa8	1.03794	1.29628	1.58076	2772.4	46.28	1	24	30	116	646	70.8272	5.51611
	Q99LC3	NADH dehydrogenase [ubiquinone] 1 alpha subcomplex subunit 10, mitochondrial OS	Ndufa10	1.31595	1.40627	1.5805	79.17	11.83	1	3	3	3	355	40.5777	7.78174
	P80314	T-complex protein 1 subunit beta OS	Cct2	0.934939	1.556	1.57642	415.686	17.2	1	7	7	12	535	57.4411	6.40479
	P62315	Small nuclear ribonucleoprotein Sm D1 OS	Snrpd1	1.10415	1.24009	1.57588	80.45	27.73	1	2	2	4	119	13.2734	11.561
	P68369	Tubulin alpha-1A chain OS	Tuba1a	0.812674	1.45833	1.57106	2271.98	54.1	3	6	19	90	451	50.1036	5.05908
	P20029	78 kDa glucose-regulated protein OS	Hspa5	1.05848	1.29743	1.56798	2167.49	50.38	1	25	28	101	655	72.3775	5.16064
	P97290	Plasma protease C1 inhibitor OS	Serping1	1.42394	0.89629	1.5649	63.6756	1.59	1	1	1	3	504	55.5492	6.29053
	Q9CXY6	Interleukin enhancer-binding factor 2 OS	Ilf2	0.830871	1.45506	1.56158	201.889	8.21	1	3	3	9	390	43.0352	5.26221
	Q62418	Drebrin-like protein OS	Dbnl	0.94874	1.40195	1.56093	117.06	8.26	1	3	3	4	436	48.6696	4.91943
	P97429	Annexin A4 OS	Anxa4	0.902709	1.25263	1.55868	138.68	12.54	1	3	3	5	319	35.8931	5.56689
	Q8BRF7	Sec1 family domain-containing protein 1 OS	Scfd1	0.947265	1.26642	1.55836	62.5519	2.66	1	2	2	3	639	72.2771	6.37939
	P80318	T-complex protein 1 subunit gamma OS	Cct3	0.8678	1.56911	1.55723	440.917	17.43	2	9	9	20	545	60.5914	6.69775
	Q64213	Splicing factor 1 OS	Sf1	0.960465	1.49708	1.55673	227.531	7.66	1	4	4	9	653	70.3581	8.98291
	Q8BH97	Reticulocalbin-3 OS	Rcn3	0.731034	1.65734	1.55478	216.52	15.24	1	5	5	10	328	37.9782	4.88135
	Q61081	Hsp90 co-chaperone Cdc37 OS	Cdc37	0.887427	1.41346	1.55255	323.01	17.15	1	6	6	11	379	44.5649	5.33838
	Q9DCH4	Eukaryotic translation initiation factor 3 subunit F OS	Eif3f	0.644612	1.58811	1.55242	108.72	10.25	1	3	3	4	361	37.9603	5.57959
	Q9QUR6	Prolyl endopeptidase OS	Prep	0.972863	1.49206	1.55071	116.49	3.24	1	2	2	4	710	80.6999	5.73193
	P35550	rRNA 2'-O-methyltransferase fibrillarin OS	Fbl	1.0499	1.48926	1.55007	104.05	12.54	2	3	3	4	327	34.2857	10.2427
	Q8BG05	Heterogeneous nuclear ribonucleoprotein A3 OS	Hnrnpa3	0.824993	1.45608	1.5499	1213.11	27.7	1	8	11	44	379	39.6276	9.01221
	Q922R8	Protein disulfide-isomerase A6 OS	Pdia6	0.961123	1.40403	1.54926	573.217	20	1	7	7	20	440	48.0703	5.13525
	Q91XC8	Death-associated protein 1 OS	Dap	0.845475	1.71581	1.54697	87.69	7.84	1	1	1	4	102	11.1477	9.36377
	P01899	H-2 class I histocompatibility antigen, D-B alpha chain OS	H2-D1	1.15379	1.04233	1.5454	471.95	32.04	12	6	10	22	362	40.8103	6.72705
	Q8BP47	Asparagine--tRNA ligase, cytoplasmic OS	Nars	1.04833	1.39176	1.54465	61.5267	6.62	1	3	3	3	559	64.238	5.85889
	Q9ERK4	Exportin-2 OS	Cse1l	0.770189	1.35559	1.52902	341.779	6.69	1	6	6	12	971	110.384	5.77002
	Q91VC3	Eukaryotic initiation factor 4A-III OS	Eif4a3	1.09609	1.24128	1.52814	195.22	12.17	1	2	4	12	411	46.8102	6.72705
	P97372	Proteasome activator complex subunit 2 OS	Psme2	1.29961	1.06989	1.52507	192.17	36.4	1	6	6	9	239	27.0401	5.75732
	P56959	RNA-binding protein FUS OS	Fus	0.9037	1.43829	1.52346	79.8984	6.37	1	3	3	5	518	52.6415	9.36377
	Q80X90	Filamin-B OS	Flnb	0.861467	1.34597	1.52346	400.993	3.77	2	5	11	20	2602	277.651	5.70654
	P70168	Importin subunit beta-1 OS	Kpnb1	0.826041	1.20749	1.52254	314.611	8.68	1	7	7	14	876	97.1221	4.77979
	Q9DCT2	NADH dehydrogenase [ubiquinone] iron-sulfur protein 3, mitochondrial OS	Ndufs3	1.27339	1.47232	1.51715	127.3	10.65	1	2	2	4	263	30.1305	7.1665
	P08249	Malate dehydrogenase, mitochondrial OS	Mdh2	1.01006	1.47264	1.51707	1479.02	50.59	1	14	14	42	338	35.5888	8.67529
	O35129	Prohibitin-2 OS	Phb2	1.1314	1.37055	1.5152	197.817	22.07	1	7	7	10	299	33.2759	9.83252
	P49722	Proteasome subunit alpha type-2 OS	Psma2	1.1178	1.25813	1.5148	137.47	20.51	1	3	3	4	234	25.9103	7.43018
	O09061	Proteasome subunit beta type-1 OS	Psmb1	0.500565	1.31466	1.51401	78.67	8.75	1	2	2	4	240	26.3553	7.81104
	Q8BK64	Activator of 90 kDa heat shock protein ATPase homolog 1 OS	Ahsa1	0.778392	1.33758	1.51252	106.76	11.54	1	3	3	4	338	38.0932	5.52881
	Q9CR16	Peptidyl-prolyl cis-trans isomerase D OS	Ppid	0.950468	1.41493	1.51221	132.362	6.76	1	3	3	6	370	40.7167	7.43018
	Q9QZE5	Coatomer subunit gamma-1 OS	Copg1	0.922986	1.5149	1.50752	369.268	11.1	1	7	8	12	874	97.4504	5.35107
	Q9CQ62	2,4-dienoyl-CoA reductase, mitochondrial OS	Decr1	1.09037	1.22559	1.50611	154.234	10.15	1	3	3	6	335	36.1907	8.95361
	Q91W90	Thioredoxin domain-containing protein 5 OS	Txndc5	0.943148	1.46528	1.50057	385.475	18.71	1	5	5	8	417	46.3859	5.78271
	P19783	Cytochrome c oxidase subunit 4 isoform 1, mitochondrial OS	Cox4i1	1.2762	1.32969	1.49897	101.64	13.02	1	2	2	4	169	19.5179	9.23193
	Q8CDN6	Thioredoxin-like protein 1 OS	Txnl1	0.982872	1.51254	1.49736	144.34	18.34	1	4	4	5	289	32.2167	4.95752
	P27773	Protein disulfide-isomerase A3 OS	Pdia3	1.00328	1.37937	1.49459	1564.46	47.52	1	24	24	71	505	56.6427	6.21436
	P62311	U6 snRNA-associated Sm-like protein LSm3 OS	Lsm3	1.06409	1.1842	1.49446	67.84	19.61	1	2	2	4	102	11.838	4.70361
	O35522	Proteasome subunit beta type-9 OS	Psmb9	1.28173	0.932506	1.4873	135.94	8.68	5	2	2	4	219	23.4117	5.22412
	Q9D0E1	Heterogeneous nuclear ribonucleoprotein M OS	Hnrnpm	0.922022	1.48076	1.48669	291.467	10.01	1	7	7	14	729	77.5974	8.63135
	Q3U0V1	Far upstream element-binding protein 2 OS	Khsrp	0.805332	1.3795	1.48664	294.953	10.7	1	4	5	12	748	76.7277	7.32764
	P97371	Proteasome activator complex subunit 1 OS	Psme1	1.25978	1.16711	1.48253	608.146	38.55	1	8	8	21	249	28.655	5.97314
	P14211	Calreticulin OS	Calr	0.952582	1.38889	1.48188	979.034	40.87	1	16	16	55	416	47.9649	4.48779
	Q91YE6	Importin-9 OS	Ipo9	1.01301	1.46752	1.48166	66.3425	1.44	1	2	2	4	1041	115.978	4.80518
	Q922D8	C-1-tetrahydrofolate synthase, cytoplasmic OS	Mthfd1	0.915313	1.39288	1.48161	126.43	5.03	1	4	4	5	935	101.136	7.13721
	P62827	GTP-binding nuclear protein Ran OS	Ran	0.930268	1.48354	1.4814	527.727	39.35	2	8	8	19	216	24.4076	7.48877
	P62858	40S ribosomal protein S28 OS	Rps28	0.690799	2.29159	1.47613	183.53	33.33	1	2	2	4	69	7.8362	10.6968
	O88569	Heterogeneous nuclear ribonucleoproteins A2/B1 OS	Hnrnpa2b1	0.910566	1.40306	1.47515	1714.99	45.33	1	13	16	70	353	37.3797	8.95361
	P46471	26S protease regulatory subunit 7 OS	Psmc2	0.933058	1.3504	1.47506	322.139	18.48	1	8	8	10	433	48.6171	5.94775
	Q8VDM4	26S proteasome non-ATPase regulatory subunit 2 OS	Psmd2	1.02474	1.34327	1.47443	231.327	9.47	1	6	6	10	908	100.139	5.17334
	P63073	Eukaryotic translation initiation factor 4E OS	Eif4e	1.0635	1.38277	1.47367	52.5033	8.29	1	2	2	3	217	25.0375	6.15088
	Q61425	Hydroxyacyl-coenzyme A dehydrogenase, mitochondrial OS	Hadh	0.940758	1.25421	1.47356	86.35	11.78	1	4	4	6	314	34.4419	8.646
	Q9JKF1	Ras GTPase-activating-like protein IQGAP1 OS	Iqgap1	1.05826	1.33328	1.47332	640.184	11.04	1	15	15	24	1657	188.624	6.48096
	Q64737	Trifunctional purine biosynthetic protein adenosine-3 OS	Gart	0.850122	1.39717	1.47312	50.3333	1.58	1	2	2	3	1010	107.436	6.68311
	Q8BKC5	Importin-5 OS	Ipo5	0.89681	1.15966	1.47052	81.7367	3.37	1	3	3	3	1097	123.511	4.93213
	Q9D8Y0	EF-hand domain-containing protein D2 OS	Efhd2	0.972339	1.35905	1.46955	96.61	8.75	1	2	2	3	240	26.7746	5.05908
	Q91VM5	RNA binding motif protein, X-linked-like-1 OS	Rbmxl1	0.75058	1.49983	1.4684	187.175	10.05	2	4	4	10	388	42.1362	9.99365
	P61979	Heterogeneous nuclear ribonucleoprotein K OS	Hnrnpk	0.834782	1.47096	1.46539	1057.87	34.77	1	14	14	49	463	50.9444	5.5415
	Q3UGR5	Haloacid dehalogenase-like hydrolase domain-containing protein 2 OS	Hdhd2	1.25563	1.24203	1.46324	127.81	8.11	1	2	2	3	259	28.7121	6.04932
	P00405	Cytochrome c oxidase subunit 2 OS	Mtco2	1.09302	1.35481	1.46231	99.89	10.57	1	3	3	5	227	25.959	4.729
	Q91W50	Cold shock domain-containing protein E1 OS	Csde1	0.629309	1.63216	1.46098	60.5033	2.76	1	2	2	3	798	88.7348	6.3667
	Q60605	Myosin light polypeptide 6 OS	Myl6	0.944588	1.27817	1.46031	757.448	47.02	2	7	7	22	151	16.9191	4.65283
	O35737	Heterogeneous nuclear ribonucleoprotein H OS	Hnrnph1	0.917769	1.38394	1.45958	326.776	20.49	2	5	7	14	449	49.1684	6.30322
	Q9Z2X1	Heterogeneous nuclear ribonucleoprotein F OS	Hnrnpf	0.941468	1.45014	1.45936	236.889	20.48	1	5	7	12	415	45.7009	5.49072
	Q3TXS7	26S proteasome non-ATPase regulatory subunit 1 OS	Psmd1	0.920599	1.29723	1.45921	229.153	6.61	1	5	5	7	953	105.663	5.38916
	Q8BMS1	Trifunctional enzyme subunit alpha, mitochondrial OS	Hadha	0.970758	1.3282	1.4568	593.182	25.95	1	17	17	30	763	82.6175	9.14404
	P28798	Granulins OS	Grn	0.907021	1.16075	1.45183	113.988	7.47	1	3	3	5	589	63.4131	6.80029
	P17225	Polypyrimidine tract-binding protein 1 OS	Ptbp1	0.816032	1.33487	1.45106	214.777	8.54	4	4	4	8	527	56.443	8.33838
	P14685	26S proteasome non-ATPase regulatory subunit 3 OS	Psmd3	0.992436	1.35094	1.45097	141.303	12.64	1	7	7	9	530	60.6803	8.44092
	Q922B2	Aspartate--tRNA ligase, cytoplasmic OS	Dars	0.991954	1.30281	1.4496	45.1467	9.78	1	4	4	4	501	57.1112	6.49365
	Q9DCX2	ATP synthase subunit d, mitochondrial OS	Atp5h	1.20926	1.31192	1.4495	229.449	41.61	1	6	6	12	161	18.7376	5.69385
	Q5XJY5	Coatomer subunit delta OS	Arcn1	0.778809	1.29207	1.44768	62.63	6.07	1	3	3	3	511	57.1932	6.21436
	P35585	AP-1 complex subunit mu-1 OS	Ap1m1	0.983788	1.31937	1.44691	88.3819	6.62	2	3	3	5	423	48.512	7.29834
	P01942	Hemoglobin subunit alpha OS	Hba	0.753281	0.957193	1.44676	8901.61	48.59	2	8	8	418	142	15.0758	8.22119
	O35295	Transcriptional activator protein Pur-beta OS	Purb	0.816968	1.38188	1.44568	198.137	8.33	1	2	2	3	324	33.8808	5.42725
	Q9DAW9	Calponin-3 OS	Cnn3	0.740604	1.49104	1.44536	129.808	9.09	2	3	3	5	330	36.4058	5.71924
	P50516	V-type proton ATPase catalytic subunit A OS	Atp6v1a	1.08928	1.23913	1.44533	150.195	6.32	1	3	3	5	617	68.2826	5.57959
	Q80XU3	Nuclear ubiquitous casein and cyclin-dependent kinase substrate 1 OS	Nucks1	0.833164	1.73364	1.44499	86.1039	3.85	1	1	1	3	234	26.2976	5.13525
	Q9CX86	Heterogeneous nuclear ribonucleoprotein A0 OS	Hnrnpa0	0.697345	1.62256	1.44307	691.843	20.98	1	5	7	29	305	30.5117	9.30518
	P09103	Protein disulfide-isomerase OS	P4hb	0.858727	1.39879	1.44266	1402.75	42.04	1	24	24	71	509	57.0228	4.88135
	Q9D0J8	Parathymosin OS	Ptms	0.844383	1.38652	1.44045	381.8	22.77	1	3	3	11	101	11.4231	4.22119
	Q9Z1D1	Eukaryotic translation initiation factor 3 subunit G OS	Eif3g	0.330892	1.40249	1.43105	83.12	8.44	1	3	3	4	320	35.6159	5.89697
	P07901	Heat shock protein HSP 90-alpha OS	Hsp90aa1	0.914529	1.29029	1.43038	1939.07	32.06	1	13	22	76	733	84.7348	5.0083
	P67778	Prohibitin OS	Phb	1.00469	1.51969	1.42975	249.275	26.1	1	6	6	8	272	29.8019	5.75732
	P21352	Alpha-1-acid glycoprotein 8 OS	Orm8	1.56127	0.875158	1.429	85.4379	18.36	2	4	4	4	207	23.8971	5.84619
	P11031	Activated RNA polymerase II transcriptional coactivator p15 OS	Sub1	0.616089	1.8063	1.42795	67.98	15.75	1	2	2	3	127	14.4184	9.59814
	P27048	Small nuclear ribonucleoprotein-associated protein B OS	Snrpb	0.920963	1.5506	1.42793	93.6696	6.49	2	2	2	4	231	23.6402	10.9019
	Q9R1Q7	Proteolipid protein 2 OS	Plp2	0.681402	1.08659	1.42773	85.0367	7.89	1	1	1	3	152	16.5967	7.13721
	P97315	Cysteine and glycine-rich protein 1 OS	Csrp1	0.938659	0.919428	1.42576	83.66	13.47	1	2	2	3	193	20.5698	8.57275
	Q921F2	TAR DNA-binding protein 43 OS	Tardbp	0.895537	1.34631	1.42515	335.24	13.77	1	6	6	12	414	44.5193	6.69775
	Q8VDP4	Cell cycle and apoptosis regulator protein 2 OS	Ccar2	0.143861	1.29221	1.42291	76.74	2.82	1	3	3	4	922	102.938	5.24951
	P12787	Cytochrome c oxidase subunit 5A, mitochondrial OS	Cox5a	1.19323	1.23359	1.42248	99.937	11.64	1	2	2	8	146	16.0913	6.53662
	P11679	Keratin, type II cytoskeletal 8 OS	Krt8	0.685132	1.28528	1.42217	1297.77	38.16	21	18	21	60	490	54.5315	5.8208
	Q91X52	L-xylulose reductase OS	Dcxr	1.00542	1.35162	1.42125	177.162	12.3	1	2	3	5	244	25.7294	7.31299
	P68037	Ubiquitin-conjugating enzyme E2 L3 OS	Ube2l3	0.881517	1.34407	1.41968	143.24	40.26	1	5	5	5	154	17.8502	8.51416
	O35286	Putative pre-mRNA-splicing factor ATP-dependent RNA helicase DHX15 OS	Dhx15	0.911518	1.3869	1.41678	186.87	6.42	1	5	5	7	795	90.9492	7.45947
	P62259	14-3-3 protein epsilon OS	Ywhae	0.919942	1.25916	1.41504	2114.56	41.96	1	8	11	82	255	29.1554	4.7417
	Q9JKR6	Hypoxia up-regulated protein 1 OS	Hyou1	0.985864	1.22309	1.41203	158.454	7.21	1	7	7	9	999	111.112	5.18604
	Q9CQU0	Thioredoxin domain-containing protein 12 OS	Txndc12	0.955881	1.36597	1.40949	86.5353	18.24	1	3	3	5	170	19.0365	5.26221
	P19536	Cytochrome c oxidase subunit 5B, mitochondrial OS	Cox5b	1.23722	1.27923	1.40933	84.13	15.63	1	2	2	5	128	13.8039	8.38232
	Q9R1P0	Proteasome subunit alpha type-4 OS	Psma4	1.06016	1.24935	1.40909	440.743	42.53	1	8	8	16	261	29.4522	7.72314
	Q9WV80	Sorting nexin-1 OS	Snx1	0.294323	1.18924	1.40877	227.89	7.85	1	3	4	7	522	58.9156	5.22412
	Q62425	NADH dehydrogenase [ubiquinone] 1 alpha subcomplex subunit 4 OS	Ndufa4	1.14189	1.37554	1.40865	202.05	56.1	1	5	5	11	82	9.32087	9.5249
	P26041	Moesin OS	Msn	0.982657	1.34915	1.40791	331.028	14.04	3	10	10	19	577	67.7249	6.59521
	P83917	Chromobox protein homolog 1 OS	Cbx1	0.818851	1.37378	1.40525	114.197	17.84	2	2	2	3	185	21.4046	4.93213
	Q9Z1N5	Spliceosome RNA helicase Ddx39b OS	Ddx39b	1.00145	1.42119	1.40445	350.757	16.59	2	6	6	13	428	49.004	5.66846
	Q3U1J4	DNA damage-binding protein 1 OS	Ddb1	0.918465	1.30705	1.40331	138.974	4.04	1	5	5	7	1140	126.772	5.26221
	Q99JI4	26S proteasome non-ATPase regulatory subunit 6 OS	Psmd6	0.911482	1.09808	1.40108	261.12	14.4	1	5	5	8	389	45.5072	5.51611
	Q01853	Transitional endoplasmic reticulum ATPase OS	Vcp	0.904292	1.35184	1.40082	1746.64	48.64	3	32	32	77	806	89.2657	5.26221
	Q9QUM9	Proteasome subunit alpha type-6 OS	Psma6	0.943276	1.22901	1.40058	362.592	20.73	1	4	4	9	246	27.3548	6.75635
	Q9Z2U1	Proteasome subunit alpha type-5 OS	Psma5	1.06204	1.23668	1.40016	281.729	24.07	1	5	5	9	241	26.3942	4.79248
	P84091	AP-2 complex subunit mu OS	Ap2m1	1.05359	1.30657	1.39817	123.53	6.9	1	3	3	4	435	49.623	9.53955
	Q64433	10 kDa heat shock protein, mitochondrial OS	Hspe1	1.1551	1.55327	1.39805	757.488	52.94	1	6	6	24	102	10.9559	8.35303
	Q6PB66	Leucine-rich PPR motif-containing protein, mitochondrial OS	Lrpprc	1.07549	1.20366	1.39785	111.03	2.59	1	4	4	5	1392	156.516	6.82959
	O70400	PDZ and LIM domain protein 1 OS	Pdlim1	1.0683	1.22406	1.39402	170.12	6.42	1	2	2	4	327	35.7519	6.84424
	Q9R1P4	Proteasome subunit alpha type-1 OS	Psma1	1.00607	1.24635	1.3898	486.531	34.98	1	10	10	25	263	29.5278	6.45557
	Q9DB20	ATP synthase subunit O, mitochondrial OS	Atp5o	1.21267	1.21772	1.38955	287.909	30.05	1	5	5	16	213	23.3487	9.99365
	Q8R081	Heterogeneous nuclear ribonucleoprotein L OS	Hnrnpl	0.758553	1.40494	1.38862	223.38	11.77	1	6	6	10	586	63.9233	8.104
	P48962	ADP/ATP translocase 1 OS	Slc25a4	1.15866	1.2949	1.3882	539.851	37.58	2	4	10	30	298	32.8831	9.71533
	Q9Z1Z2	Serine-threonine kinase receptor-associated protein OS	Strap	0.885679	1.18368	1.38728	71.7467	11.43	1	3	3	4	350	38.418	5.12256
	P57780	Alpha-actinin-4 OS	Actn4	0.884081	1.26085	1.38567	1280.6	33.22	3	14	25	45	912	104.911	5.41455
	Q9R1P1	Proteasome subunit beta type-3 OS	Psmb3	0.906862	1.32457	1.38498	211.34	21.46	1	3	3	5	205	22.9494	6.55127
	Q06185	ATP synthase subunit e, mitochondrial OS	Atp5i	1.02356	1.17151	1.38482	210.94	32.39	1	2	2	4	71	8.23047	9.34912
	P17047	Lysosome-associated membrane glycoprotein 2 OS	Lamp2	1.17431	1.16626	1.3827	119.09	4.34	1	2	2	5	415	45.652	7.38623
	P63038	60 kDa heat shock protein, mitochondrial OS	Hspd1	1.08046	1.25566	1.3822	2222.19	56.72	1	25	25	77	573	60.9174	6.17627
	P28658	Ataxin-10 OS	Atxn10	1.03889	1.3853	1.38186	103.193	4.63	1	2	2	3	475	53.6725	5.24951
	Q8VEM8	Phosphate carrier protein, mitochondrial OS	Slc25a3	1.09283	1.27113	1.38084	334.025	13.17	1	6	6	16	357	39.6065	9.26123
	Q8R016	Bleomycin hydrolase OS	Blmh	0.941859	1.42272	1.38022	133.03	5.49	1	3	3	6	455	52.4769	6.48096
	Q9CYN2	Signal peptidase complex subunit 2 OS	Spcs2	0.859536	1.2826	1.37968	379.263	13.27	1	2	2	5	226	24.9617	8.57275
	Q8BFR5	Elongation factor Tu, mitochondrial OS	Tufm	0.906739	1.29594	1.37679	270.56	21.46	1	9	9	12	452	49.477	7.56201
	Q9D3D9	ATP synthase subunit delta, mitochondrial OS	Atp5d	0.843975	1.2055	1.3759	492.91	13.69	1	2	2	8	168	17.5891	5.08447
	Q99LD4	COP9 signalosome complex subunit 1 OS	Gps1	0.348325	1.14809	1.3748	143.2	4.67	1	2	2	4	471	53.4081	6.84424
	Q8BGD9	Eukaryotic translation initiation factor 4B OS	Eif4b	0.93373	1.27782	1.37468	56.2867	5.24	1	3	3	3	611	68.7992	5.66846
	Q9WVJ2	26S proteasome non-ATPase regulatory subunit 13 OS	Psmd13	0.860783	1.20819	1.37445	251.81	19.41	1	8	8	10	376	42.7821	5.70654
	P17742	Peptidyl-prolyl cis-trans isomerase A OS	Ppia	0.978632	1.45629	1.37367	1027.32	57.32	1	11	11	44	164	17.9599	7.89893
	P60867	40S ribosomal protein S20 OS	Rps20	0.675228	1.39864	1.37302	80.14	15.13	1	2	2	5	119	13.3643	9.93506
	Q9WTX5	S-phase kinase-associated protein 1 OS	Skp1	0.901724	1.24241	1.37121	96.3667	11.66	1	2	2	3	163	18.6603	4.53857
	P01831	Thy-1 membrane glycoprotein OS	Thy1	0.930721	1.47037	1.37038	204.61	14.81	1	2	2	6	162	18.0685	8.96826
	O70503	Estradiol 17-beta-dehydrogenase 12 OS	Hsd17b12	1.12829	1.14759	1.37	274.86	28.53	1	8	8	11	312	34.7194	9.5249
	P54728	UV excision repair protein RAD23 homolog B OS	Rad23b	0.924092	1.23669	1.36923	187.483	8.41	2	4	4	8	416	43.4858	4.83057
	P68510	14-3-3 protein eta OS	Ywhah	0.927294	1.36016	1.36737	1918.42	41.06	1	4	9	76	246	28.194	4.89404
	P50544	Very long-chain specific acyl-CoA dehydrogenase, mitochondrial OS	Acadvl	1.06748	1.05026	1.36383	89.02	3.81	1	2	2	3	656	70.8307	8.74854
	P62821	Ras-related protein Rab-1A OS	Rab1A	0.898948	1.31228	1.36357	751.812	48.78	17	3	10	31	205	22.6634	6.21436
	P56391	Cytochrome c oxidase subunit 6B1 OS	Cox6b1	1.30782	1.31863	1.36324	118.33	37.21	1	3	3	5	86	10.0649	8.71924
	Q60692	Proteasome subunit beta type-6 OS	Psmb6	0.783137	1.52317	1.36058	174.543	16.81	1	4	4	6	238	25.3625	5.10986
	Q8BMP6	Golgi resident protein GCP60 OS	Acbd3	0.576884	1.36618	1.35941	119.13	4.38	1	2	2	3	525	60.1438	5.10986
	Q8QZT1	Acetyl-CoA acetyltransferase, mitochondrial OS	Acat1	0.881127	1.46289	1.35719	228.727	11.08	1	4	4	8	424	44.7873	8.51416
	Q03265	ATP synthase subunit alpha, mitochondrial OS	Atp5a1	1.19327	1.21561	1.35561	1995.96	37.97	1	19	19	80	553	59.7156	9.18799
	P97450	ATP synthase-coupling factor 6, mitochondrial OS	Atp5j	1.27819	1.12374	1.35364	72.23	32.41	1	3	3	5	108	12.4886	9.36377
	P45952	Medium-chain specific acyl-CoA dehydrogenase, mitochondrial OS	Acadm	1.25308	1.2065	1.35358	268.522	11.4	1	4	4	9	421	46.4516	8.36768
	P28063	Proteasome subunit beta type-8 OS	Psmb8	1.13022	1.10319	1.35136	156.287	13.04	1	3	3	6	276	30.2406	6.68311
	P99028	Cytochrome b-c1 complex subunit 6, mitochondrial OS	Uqcrh	1.20345	1.1656	1.35036	183.45	37.08	1	2	2	5	89	10.428	4.86865
	P51125	Calpastatin OS	Cast	0.179374	0.910683	1.34967	106.72	4.44	1	2	2	3	788	84.8706	5.51611
	Q9R1P3	Proteasome subunit beta type-2 OS	Psmb2	0.944928	1.25784	1.34793	151.283	29.85	1	6	6	11	201	22.8917	7.02002
	O70435	Proteasome subunit alpha type-3 OS	Psma3	0.976427	1.1983	1.34676	298.147	38.04	1	10	10	19	255	28.3871	5.43994
	O35643	AP-1 complex subunit beta-1 OS	Ap1b1	1.0386	1.29968	1.34539	485.627	9.65	1	2	10	16	943	103.869	5.17334
	P61079	Ubiquitin-conjugating enzyme E2 D3 OS	Ube2d3	1.01138	1.31036	1.34463	154.42	7.48	3	1	1	4	147	16.6764	7.79639
	P09055	Integrin beta-1 OS	Itgb1	0.916004	1.18745	1.34375	184.929	5.01	1	4	4	7	798	88.1733	5.93506
	Q6P5F9	Exportin-1 OS	Xpo1	0.905896	1.28787	1.34336	173.605	5.42	1	6	6	7	1071	123.013	6.07471
	Q8BWT1	3-ketoacyl-CoA thiolase, mitochondrial OS	Acaa2	0.993662	1.3068	1.34044	237.51	12.09	1	5	5	9	397	41.8034	8.08936
	O35350	Calpain-1 catalytic subunit OS	Capn1	1.0098	1.23154	1.3404	94.8014	4.07	1	3	3	4	713	82.0543	5.87158
	Q9Z0J0	Epididymal secretory protein E1 OS	Npc2	1.07773	1.14258	1.33968	235.04	6.04	1	1	1	6	149	16.4315	7.6792
	P54071	Isocitrate dehydrogenase [NADP], mitochondrial OS	Idh2	1.03474	1.33382	1.33961	568.895	23.45	2	10	11	29	452	50.8739	8.68994
	P56480	ATP synthase subunit beta, mitochondrial OS	Atp5b	1.25725	1.21842	1.33896	1807.05	58.98	1	19	19	55	529	56.2655	5.33838
	P08003	Protein disulfide-isomerase A4 OS	Pdia4	0.957641	1.2675	1.33495	583.954	24.61	1	16	16	27	638	71.9375	5.31299
	Q11011	Puromycin-sensitive aminopeptidase OS	Npepps	1.07707	1.2204	1.33399	147.08	4.13	1	4	4	7	920	103.26	5.89697
	Q9D8W5	26S proteasome non-ATPase regulatory subunit 12 OS	Psmd12	0.913959	1.22574	1.33303	135.336	8.55	1	4	4	7	456	52.8615	7.06396
	Q61316	Heat shock 70 kDa protein 4 OS	Hspa4	0.930131	1.20321	1.33294	528.769	23.31	3	16	16	22	841	94.0733	5.23682
	O08788	Dynactin subunit 1 OS	Dctn1	1.06988	1.13319	1.33283	159.7	3.59	1	4	4	5	1281	141.588	5.89697
	Q9DB77	Cytochrome b-c1 complex subunit 2, mitochondrial OS	Uqcrc2	1.1063	1.15794	1.33256	344.225	17.22	1	7	7	13	453	48.205	9.24658
	Q91VR2	ATP synthase subunit gamma, mitochondrial OS	Atp5c1	1.14071	1.22117	1.33123	371.436	17.11	1	5	5	12	298	32.8651	9.01221
	Q9QXT0	Protein canopy homolog 2 OS	Cnpy2	0.933709	1.24789	1.32909	244.273	26.92	1	4	4	6	182	20.7543	5.07178
	P61957	Small ubiquitin-related modifier 2 OS	Sumo2	0.833113	1.33756	1.32884	127.01	23.16	2	2	2	4	95	10.8644	5.50342
	P54822	Adenylosuccinate lyase OS	Adsl	0.84085	1.14995	1.32811	173.58	4.55	1	2	2	4	484	54.8309	7.26904
	P21107	Tropomyosin alpha-3 chain OS	Tpm3	0.655206	1.19443	1.32569	589.143	26.67	1	3	9	26	285	32.9738	4.71631
	Q61696	Heat shock 70 kDa protein 1A OS	Hspa1a	0.539434	0.997794	1.32544	403.147	13.1	2	4	8	31	641	70.036	5.71924
	P62320	Small nuclear ribonucleoprotein Sm D3 OS	Snrpd3	0.910103	1.28168	1.324	185.774	31.75	1	3	3	6	126	13.9073	10.3159
	Q3THS6	S-adenosylmethionine synthase isoform type-2 OS	Mat2a	1.01111	1.22998	1.32163	130.23	12.41	2	3	3	5	395	43.6614	6.48096
	Q99JY0	Trifunctional enzyme subunit beta, mitochondrial OS	Hadhb	0.907619	1.24449	1.32099	343.037	11.37	1	5	5	11	475	51.3534	9.37842
	P70202	Latexin OS	Lxn	1.01083	1.29959	1.32083	140.236	9.46	1	2	2	5	222	25.4756	5.74463
	P46935	E3 ubiquitin-protein ligase NEDD4 OS	Nedd4	0.734459	1.36669	1.32045	322.935	4.62	2	4	4	10	887	102.642	5.26221
	P62806	Histone H4 OS	Hist1h4a	0.829986	1.86111	1.31954	129.83	17.48	1	2	2	4	103	11.3604	11.356
	P50543	Protein S100-A11 OS	S100a11	0.914088	1.26822	1.31676	93.54	34.69	1	3	3	5	98	11.0755	5.45264
	Q3UPL0	Protein transport protein Sec31A OS	Sec31a	0.933426	1.42967	1.31552	115.475	4.39	1	5	5	7	1230	133.486	6.75635
	P09671	Superoxide dismutase [Mn], mitochondrial OS	Sod2	1.32727	1.11707	1.31428	84.02	13.51	1	3	3	4	222	24.5875	8.6167
	Q9CQ60	6-phosphogluconolactonase OS	Pgls	0.991439	1.20243	1.31253	199.623	27.63	1	5	5	10	257	27.2374	5.84619
	Q9Z1Q5	Chloride intracellular channel protein 1 OS	Clic1	0.946519	1.32119	1.31139	512.295	57.26	1	10	10	19	241	26.9957	5.17334
	Q9D8B3	Charged multivesicular body protein 4b OS	Chmp4b	0.970982	1.12945	1.31122	71.3567	8.48	1	2	2	3	224	24.9206	4.81787
	Q3UM45	Protein phosphatase 1 regulatory subunit 7 OS	Ppp1r7	1.05196	1.0366	1.31113	79.34	10.25	1	3	3	4	361	41.2665	4.91943
	Q9DBH5	Vesicular integral-membrane protein VIP36 OS	Lman2	1.15938	1.23767	1.30886	173.91	8.38	1	3	3	5	358	40.4042	6.94678
	Q7TMY8	E3 ubiquitin-protein ligase HUWE1 OS	Huwe1	0.732142	1.21263	1.30866	130.467	1.05	1	3	3	3	4377	482.332	5.22412
	Q9CZ13	Cytochrome b-c1 complex subunit 1, mitochondrial OS	Uqcrc1	1.17854	1.12609	1.30864	397.387	24.79	2	9	9	15	480	52.8185	6.21436
	P12382	ATP-dependent 6-phosphofructokinase, liver type OS	Pfkl	1.10057	1.24878	1.30043	345.687	15.9	2	7	8	11	780	85.3054	7.1665
	P70296	Phosphatidylethanolamine-binding protein 1 OS	Pebp1	0.950331	1.24138	1.30043	398.775	43.32	1	5	5	16	187	20.8173	5.40186
	P10639	Thioredoxin OS	Txn	1.05903	1.10188	1.29977	444.057	40	1	4	4	16	105	11.6676	4.91943
	P70699	Lysosomal alpha-glucosidase OS	Gaa	0.764841	1.29589	1.29949	126.92	3.88	1	4	4	6	953	106.18	5.8335
	Q9JHU4	Cytoplasmic dynein 1 heavy chain 1 OS	Dync1h1	0.964742	1.22235	1.29687	318.993	3.1	1	14	14	17	4644	531.71	6.41748
	P25911	Tyrosine-protein kinase Lyn OS	Lyn	1.09512	1.26482	1.29473	119.935	5.27	28	2	3	4	512	58.7747	7.15186
	O70492	Sorting nexin-3 OS	Snx3	0.76541	1.1289	1.2931	117.29	16.67	1	2	3	8	162	18.7457	8.66064
	P34884	Macrophage migration inhibitory factor OS	Mif	1.05399	1.40211	1.29288	76.83	13.91	1	2	2	5	115	12.4962	7.34229
	P63168	Dynein light chain 1, cytoplasmic OS	Dynll1	0.908178	1.17596	1.28861	57.99	20.22	1	1	2	4	89	10.3591	7.40088
	P17427	AP-2 complex subunit alpha-2 OS	Ap2a2	0.984086	1.27112	1.28798	134.399	4.26	1	2	5	8	938	103.951	6.93213
	P35564	Calnexin OS	Canx	0.991995	1.11254	1.28608	682.072	20.98	1	11	11	27	591	67.2357	4.64014
	Q8BTM8	Filamin-A OS	Flna	0.884687	1.30773	1.28591	1038.17	15.38	2	25	31	44	2647	281.046	6.03662
	Q61879	Myosin-10 OS	Myh10	0.0613824	1.01519	1.2836	723.128	8.2	1	4	17	33	1976	228.855	5.5415
	P02301	Histone H3.3C OS	H3f3c	0.823248	1.52857	1.27993	61.86	11.76	4	2	2	5	136	15.3055	11.1362
	Q9Z1F9	SUMO-activating enzyme subunit 2 OS	Uba2	0.781224	1.22268	1.27947	138.14	6.11	1	2	2	3	638	70.5247	5.23682
	P48774	Glutathione S-transferase Mu 5 OS	Gstm5	0.877438	1.27493	1.27945	243.114	30.8	1	5	7	14	224	26.6172	7.21045
	Q99PV0	Pre-mRNA-processing-splicing factor 8 OS	Prpf8	0.581979	1.32995	1.27928	58.05	0.77	1	2	2	3	2335	273.443	8.83643
	P47802	Metaxin-1 OS	Mtx1	0.437403	1.01874	1.27904	84.52	6.31	1	2	2	4	317	35.6013	6.17627
	Q9CPQ1	Cytochrome c oxidase subunit 6C OS	Cox6c	1.22098	1.29247	1.27725	229.35	21.05	1	3	3	10	76	8.46351	10.1401
	P38647	Stress-70 protein, mitochondrial OS	Hspa9	1.05553	1.17226	1.27209	1412.69	32.11	1	18	19	50	679	73.4156	6.07471
	O08585	Clathrin light chain A OS	Clta	0.6895	1.20545	1.27168	154.69	20	2	6	6	10	235	25.5885	4.57666
	Q9CZ44	NSFL1 cofactor p47 OS	Nsfl1c	0.647523	1.2273	1.27144	222.487	12.43	1	4	4	8	370	40.6854	5.14795
	Q8BG32	26S proteasome non-ATPase regulatory subunit 11 OS	Psmd11	0.792056	1.17547	1.26838	90.7	9.72	1	4	4	5	422	47.407	6.48096
	Q8BFY9	Transportin-1 OS	Tnpo1	0.843591	1.11683	1.2682	122.01	5.79	2	4	4	5	898	102.291	4.98291
	Q9QZD8	Mitochondrial dicarboxylate carrier OS	Slc25a10	1.24532	1.07869	1.26818	185.698	25.78	1	6	6	10	287	31.6941	9.31982
	P08074	Carbonyl reductase [NADPH] 2 OS	Cbr2	1.12128	1.2839	1.26817	342.715	25.82	1	5	6	14	244	25.9416	9.01221
	P49300	C-type lectin domain family 10 member A OS	Clec10a	1.41808	0.886811	1.26568	99.1	5.59	1	2	2	3	304	34.5742	5.5542
	Q02819	Nucleobindin-1 OS	Nucb1	0.95914	1.1725	1.2652	196.18	8.71	1	3	3	6	459	53.3759	5.07178
	O55143	Sarcoplasmic/endoplasmic reticulum calcium ATPase 2 OS	Atp2a2	0.921043	1.10251	1.26482	188.23	4.21	2	4	4	6	1044	114.784	5.33838
	Q68FD5	Clathrin heavy chain 1 OS	Cltc	1.01488	1.16637	1.26438	2362.51	33.13	1	45	45	85	1675	191.435	5.69385
	Q9Z2U0	Proteasome subunit alpha type-7 OS	Psma7	0.976116	1.24682	1.26414	427.781	29.03	2	7	7	15	248	27.8376	8.45557
	P02088	Hemoglobin subunit beta-1 OS	Hbb-b1	0.744903	0.845436	1.26392	5242.58	79.59	3	10	10	288	147	15.8301	7.6499
	Q922Q1	Mitochondrial amidoxime reducing component 2 OS	2018-03-02	1.306	1.24439	1.26354	92.8571	7.1	1	3	3	4	338	38.1696	8.67529
	Q64010	Adapter molecule crk OS	Crk	0.910167	1.20519	1.26227	129.833	7.57	1	3	3	6	304	33.794	5.5542
	P56399	Ubiquitin carboxyl-terminal hydrolase 5 OS	Usp5	0.988555	1.14158	1.26143	173.549	6.06	1	4	4	6	858	95.7724	5.0083
	O08795	Glucosidase 2 subunit beta OS	Prkcsh	0.911435	1.20691	1.26073	101.08	8.64	1	5	5	6	521	58.7558	4.4624
	P03987	Ig gamma-3 chain C region OS	1	1.3228	0.905953	1.26052	80.51	5.28	1	2	2	4	398	43.9013	7.13721
	Q9Z2I8	Succinyl-CoA ligase [GDP-forming] subunit beta, mitochondrial OS	Suclg2	1.02293	1.22013	1.25974	156.32	4.62	1	2	2	4	433	46.8107	7.02002
	Q02053	Ubiquitin-like modifier-activating enzyme 1 OS	Uba1	0.959636	1.14914	1.25608	1752.59	24.95	2	24	24	63	1058	117.734	5.65576
	Q9R0L9	Sialomucin core protein 24 OS	Cd164	1.88684	0.83253	1.25521	39.56	15.23	1	1	1	4	197	21.0455	8.29443
	P61750	ADP-ribosylation factor 4 OS	Arf4	0.984243	1.29781	1.25169	462.583	35	1	2	5	17	180	20.3836	7.13721
	O35114	Lysosome membrane protein 2 OS	Scarb2	1.07848	1.1677	1.2506	165.434	10.88	1	4	4	6	478	54.0095	5.09717
	P70372	ELAV-like protein 1 OS	Elavl1	0.880223	1.24547	1.2502	127.953	13.19	1	5	5	8	326	36.1461	9.0415
	P53994	Ras-related protein Rab-2A OS	Rab2a	0.890222	1.10015	1.24833	153.27	23.11	2	4	4	4	212	23.5328	6.53662
	Q62188	Dihydropyrimidinase-related protein 3 OS	Dpysl3	0.946995	1.18405	1.24807	125.34	9.3	1	3	4	5	570	61.8971	6.49365
	Q62426	Cystatin-B OS	Cstb	1.00255	1.20918	1.24385	290.523	32.65	1	2	2	8	98	11.0385	7.38623
	O70456	14-3-3 protein sigma OS	Sfn	0.509937	1.38612	1.24326	1747.54	36.29	1	5	9	70	248	27.6887	4.77979
	Q9DAR7	m7GpppX diphosphatase OS	Dcps	1.01192	1.22592	1.24273	93.8767	8.58	1	3	3	4	338	38.9643	6.48096
	P63101	14-3-3 protein zeta/delta OS	Ywhaz	0.941581	1.2143	1.239	2953.99	56.33	1	9	13	103	245	27.7537	4.79248
	Q9D1A2	Cytosolic non-specific dipeptidase OS	Cndp2	1.07819	1.09773	1.23858	349.473	21.26	1	8	8	16	475	52.7336	5.65576
	Q9D0K2	Succinyl-CoA:3-ketoacid coenzyme A transferase 1, mitochondrial OS	Oxct1	1.03167	1.18874	1.23787	48.3267	5.19	1	3	3	3	520	55.953	8.52881
	Q62422	Osteoclast-stimulating factor 1 OS	Ostf1	1.03129	1.31605	1.23548	154.47	28.37	1	4	4	5	215	23.7679	5.68115
	Q62348	Translin OS	Tsn	0.944713	1.25876	1.2347	94.8	10.09	1	2	2	4	228	26.1848	6.44287
	Q9DBL1	Short/branched chain specific acyl-CoA dehydrogenase, mitochondrial OS	Acadsb	1.23994	1.14439	1.23469	226.725	14.12	1	4	4	8	432	47.8433	7.86963
	P55264	Adenosine kinase OS	Adk	0.898292	1.23189	1.23397	259.875	19.94	1	7	7	12	361	40.1235	6.21436
	P70349	Histidine triad nucleotide-binding protein 1 OS	Hint1	1.01097	1.17687	1.23374	220.978	23.02	1	3	3	7	126	13.7681	6.87354
	Q9CPV4	Glyoxalase domain-containing protein 4 OS	Glod4	1.0375	1.12392	1.23371	170.885	28.86	1	8	8	8	298	33.2955	5.46533
	P09411	Phosphoglycerate kinase 1 OS	Pgk1	1.01736	1.20894	1.23215	716.729	45.32	2	16	16	31	417	44.522	7.89893
	Q7TPR4	Alpha-actinin-1 OS	Actn1	0.850562	1.19315	1.23209	1004.25	23.09	3	6	17	35	892	103.004	5.37646
	Q8VDM6	Heterogeneous nuclear ribonucleoprotein U-like protein 1 OS	Hnrnpul1	0.86868	1.28315	1.23186	68.0074	3.49	1	3	3	5	859	95.9425	6.58057
	Q8BHN3	Neutral alpha-glucosidase AB OS	Ganab	0.876678	1.22574	1.23066	361.012	13.67	1	12	12	25	944	106.844	6.06201
	Q9CQQ7	ATP synthase F(0) complex subunit B1, mitochondrial OS	Atp5f1	1.09702	1.20113	1.22852	378.957	21.09	1	6	6	12	256	28.9304	9.05615
	Q9CQM9	Glutaredoxin-3 OS	Glrx3	1.07818	1.1719	1.22605	271.573	14.54	1	4	4	9	337	37.7544	5.59229
	Q9DBC7	cAMP-dependent protein kinase type I-alpha regulatory subunit OS	Prkar1a	0.363408	1.33083	1.22496	196.256	8.14	2	4	4	6	381	43.158	5.35107
	P63024	Vesicle-associated membrane protein 3 OS	Vamp3	0.185467	0.993233	1.2236	82.2633	23.3	3	2	2	3	103	11.473	8.49951
	Q64531	Hypoxanthine-guanine phosphoribosyltransferase (Fragment) OS	Hprt1	1.15806	1.1531	1.2226	119.15	21.5	2	4	4	4	214	24.0663	6.13818
	Q9CR68	Cytochrome b-c1 complex subunit Rieske, mitochondrial OS	Uqcrfs1	0.979349	1.1201	1.21968	84.86	15.33	1	3	3	4	274	29.3492	8.70459
	Q91YT0	NADH dehydrogenase [ubiquinone] flavoprotein 1, mitochondrial OS	Ndufv1	1.04502	1.04777	1.21743	63.1833	4.53	1	2	2	3	464	50.8017	8.20654
	Q9D1Q6	Endoplasmic reticulum resident protein 44 OS	Erp44	0.686997	1.33031	1.2166	46.28	7.39	1	3	3	3	406	46.8233	5.2749
	Q9WVK4	EH domain-containing protein 1 OS	Ehd1	0.978536	1.17413	1.21452	122.943	6.93	3	3	4	6	534	60.5646	6.82959
	P08226	Apolipoprotein E OS	Apoe	1.07695	0.946248	1.21294	409.32	21.22	1	6	6	12	311	35.8444	5.68115
	O88351	Inhibitor of nuclear factor kappa-B kinase subunit beta OS	Ikbkb	1.05529	1.10051	1.21278	91.71	1.45	1	1	1	3	757	86.635	6.40479
	P18760	Cofilin-1 OS	Cfl1	1.03579	1.31122	1.21264	923.813	66.87	2	11	12	39	166	18.5477	8.08936
	Q9DC69	NADH dehydrogenase [ubiquinone] 1 alpha subcomplex subunit 9, mitochondrial OS	Ndufa9	0.944374	1.12167	1.21229	76.72	9.55	1	3	3	4	377	42.4984	9.74463
	Q91WJ8	Far upstream element-binding protein 1 OS	Fubp1	1.05281	1.18893	1.21218	144.577	4.92	1	2	3	6	651	68.497	7.92822
	P18242	Cathepsin D OS	Ctsd	0.999134	1.1118	1.21131	568.47	25.61	1	8	8	22	410	44.925	7.15186
	Q8VDN2	Sodium/potassium-transporting ATPase subunit alpha-1 OS	Atp1a1	0.841355	1.18482	1.21055	225.896	8.6	6	9	9	13	1023	112.91	5.45264
	Q8CAQ8	Mitochondrial inner membrane protein OS	Immt	0.783144	1.15395	1.2094	107.105	2.51	1	2	2	3	757	83.8482	6.60986
	Q8VCT3	Aminopeptidase B OS	Rnpep	1.0766	1.12076	1.20772	66.1433	4.46	1	3	3	3	650	72.3701	5.35107
	Q61598	Rab GDP dissociation inhibitor beta OS	Gdi2	0.987256	1.11656	1.20743	756.554	49.44	1	17	19	34	445	50.5047	6.25244
	Q9CZB0	Succinate dehydrogenase cytochrome b560 subunit, mitochondrial OS	Sdhc	1.21518	1.19554	1.20656	166.055	12.43	1	2	2	8	169	18.3699	9.93506
	Q9D1J1	Adaptin ear-binding coat-associated protein 2 OS	Necap2	1.01237	1.18472	1.20468	63.51	10.9	1	2	2	3	266	28.5804	7.94287
	P35278	Ras-related protein Rab-5C OS	Rab5c	0.957009	1.09344	1.20408	305.665	32.41	2	3	6	11	216	23.3978	8.41162
	Q9JHJ0	Tropomodulin-3 OS	Tmod3	1.03612	1.14408	1.20275	126.694	5.4	3	2	2	4	352	39.4783	5.13525
	P61089	Ubiquitin-conjugating enzyme E2 N OS	Ube2n	0.617179	1.14711	1.20164	153.753	19.74	1	3	3	6	152	17.127	6.56592
	P37804	Transgelin OS	Tagln	0.688585	1.05218	1.20095	462.44	52.24	1	11	11	20	201	22.5614	8.80713
	Q80UG5	Septin-9 OS	2018-09-09	0.57524	0.982164	1.19978	66.4142	2.92	1	2	2	3	583	65.5339	8.89502
	Q91YR1	Twinfilin-1 OS	Twf1	0.829016	1.20365	1.19816	78.85	6.57	2	3	3	4	350	40.0545	6.66846
	Q76MZ3	Serine/threonine-protein phosphatase 2A 65 kDa regulatory subunit A alpha isoform OS	Ppp2r1a	0.978378	1.14411	1.19449	583.444	22.92	2	11	11	24	589	65.2809	5.10986
	Q61753	D-3-phosphoglycerate dehydrogenase OS	Phgdh	0.880967	1.06769	1.19024	686.196	21.39	1	10	10	25	533	56.5491	6.53662
	P63005	Platelet-activating factor acetylhydrolase IB subunit alpha OS	Pafah1b1	0.898852	1.22911	1.18875	94.7	5.61	1	3	3	4	410	46.6401	7.37158
	P97807	Fumarate hydratase, mitochondrial OS	Fh	1.0813	1.18322	1.18721	345.074	19.53	1	9	9	14	507	54.3221	9.0415
	O88587	Catechol O-methyltransferase OS	Comt	0.884967	1.18278	1.18628	313.639	27.55	1	5	5	11	265	29.4673	5.8335
	Q60648	Ganglioside GM2 activator OS	Gm2a	0.928731	1.29793	1.18616	166.3	10.36	1	2	2	5	193	20.8108	5.89697
	P19001	Keratin, type I cytoskeletal 19 OS	Krt19	0.694589	1.10759	1.18481	408.744	34.24	16	9	12	23	403	44.5147	5.38916
	Q9JII6	Alcohol dehydrogenase [NADP(+)] OS	Akr1a1	1.02072	1.01839	1.18256	226.428	14.46	1	5	5	11	325	36.5639	7.38623
	Q6ZQ38	Cullin-associated NEDD8-dissociated protein 1 OS	Cand1	0.919647	1.16094	1.18105	607.02	11.63	1	12	12	18	1230	136.245	5.78271
	Q9DCN2	NADH-cytochrome b5 reductase 3 OS	Cyb5r3	0.976852	1.12433	1.18056	182.205	13.29	1	4	4	8	301	34.1057	8.38232
	E9PV24	Fibrinogen alpha chain OS	Fga	1.01028	0.7957	1.17999	332.826	12.67	1	9	9	16	789	87.3753	6.11279
	Q99L47	Hsc70-interacting protein OS	St13	0.968592	1.16263	1.17798	417.527	18.6	1	6	6	13	371	41.6295	5.26221
	Q61335	B-cell receptor-associated protein 31 OS	Bcap31	0.90417	1.01433	1.17702	98.43	17.55	1	2	2	5	245	27.939	8.70459
	Q60710	Deoxynucleoside triphosphate triphosphohydrolase SAMHD1 OS	Samhd1	1.2768	0.884387	1.17088	408.123	22.33	1	12	12	24	627	72.6042	7.95752
	P19221	Prothrombin OS	F2	0.751568	1.12176	1.17083	138.143	8.9	1	6	6	7	618	70.2237	6.43018
	P68254	14-3-3 protein theta OS	Ywhaq	0.932793	1.07248	1.17016	2651.56	52.65	1	7	12	95	245	27.7608	4.77979
	Q8CGK3	Lon protease homolog, mitochondrial OS	Lonp1	1.09279	0.621166	1.16965	139.941	4.32	1	4	4	10	949	105.776	6.56592
	Q91VI7	Ribonuclease inhibitor OS	Rnh1	0.949271	1.12381	1.1687	404.19	30.48	1	10	10	14	456	49.7841	4.77979
	Q9CQA3	Succinate dehydrogenase [ubiquinone] iron-sulfur subunit, mitochondrial OS	Sdhb	1.08414	1.12555	1.16797	183.53	20.92	1	6	6	10	282	31.7929	8.67529
	P35700	Peroxiredoxin-1 OS	Prdx1	0.940395	1.12751	1.16584	1458.14	52.26	2	10	10	55	199	22.1624	8.11865
	Q9CWJ9	Bifunctional purine biosynthesis protein PURH OS	Atic	0.947777	1.16881	1.16563	491.098	17.06	1	8	8	18	592	64.1771	6.75635
	O88712	C-terminal-binding protein 1 OS	Ctbp1	0.934137	1.09377	1.16456	100.181	8.16	1	2	4	5	441	47.7145	6.771
	P61205	ADP-ribosylation factor 3 OS	Arf3	0.835262	1.10618	1.16355	519.157	47.51	3	4	7	19	181	20.5877	7.43018
	O88342	WD repeat-containing protein 1 OS	Wdr1	0.964252	1.11401	1.16127	653.912	29.21	1	14	14	30	606	66.365	6.59521
	Q91VS7	Microsomal glutathione S-transferase 1 OS	Mgst1	1.20608	0.930722	1.16023	414.83	26.45	1	3	3	12	155	17.5401	9.65674
	P28271	Cytoplasmic aconitate hydratase OS	Aco1	0.879077	1.1011	1.15884	338.438	14.85	2	11	11	15	889	98.0635	7.50342
	Q99KK7	Dipeptidyl peptidase 3 OS	Dpp3	0.714618	1.18861	1.15722	54.31	7.05	1	5	5	5	738	82.8461	5.37646
	Q9JKP5	Muscleblind-like protein 1 OS	Mbnl1	0.976099	1.20164	1.15514	85.6767	5.87	2	2	2	3	341	36.9513	8.60205
	P26039	Talin-1 OS	Tln1	0.942059	1.11334	1.15416	1856.87	18.93	2	40	40	69	2541	269.653	6.17627
	O55023	Inositol monophosphatase 1 OS	Impa1	0.986339	1.03039	1.154	182.32	7.94	1	2	2	5	277	30.4162	5.18604
	P40142	Transketolase OS	Tkt	0.91293	1.29852	1.15241	2714.74	50.24	1	26	26	123	623	67.5876	7.50342
	Q9CQC9	GTP-binding protein SAR1b OS	Sar1b	1.04259	1.05653	1.15117	276.81	9.6	2	2	2	8	198	22.3675	6.11279
	Q62000	Mimecan OS	Ogn	1.01778	0.824483	1.15089	150.59	8.72	1	2	2	5	298	33.9906	5.74463
	P62743	AP-2 complex subunit sigma OS	Ap2s1	1.05452	1.17055	1.15077	71.1767	13.38	1	2	2	3	142	17.0067	6.17627
	Q5FWK3	Rho GTPase-activating protein 1 OS	Arhgap1	0.974372	1.20345	1.15042	118.05	4.1	1	2	2	3	439	50.3791	6.44287
	P52480	Pyruvate kinase PKM OS	Pkm	0.95609	1.10331	1.15029	2001.99	54.99	2	25	25	76	531	57.808	7.47412
	P52503	NADH dehydrogenase [ubiquinone] iron-sulfur protein 6, mitochondrial OS	Ndufs6	1.02954	0.987083	1.15014	142.993	12.93	1	1	1	3	116	13.0117	8.646
	P62774	Myotrophin OS	Mtpn	0.875894	1.14307	1.14809	144.523	22.03	1	2	2	3	118	12.8526	5.51611
	P26638	Serine--tRNA ligase, cytoplasmic OS	Sars	0.935657	1.80336	1.14701	156.209	7.81	1	4	4	7	512	58.3517	6.30322
	Q91V41	Ras-related protein Rab-14 OS	Rab14	1.1075	1.11927	1.14595	469.905	29.77	13	5	6	18	215	23.8819	6.21436
	O09131	Glutathione S-transferase omega-1 OS	Gsto1	0.980909	1.13069	1.14536	69.5187	9.58	1	3	3	6	240	27.4799	7.35693
	P23492	Purine nucleoside phosphorylase OS	Pnp	1.30993	0.802975	1.14389	306.014	26.99	1	6	6	11	289	32.2561	6.16357
	P63330	Serine/threonine-protein phosphatase 2A catalytic subunit alpha isoform OS	Ppp2ca	1.08372	1.22116	1.14009	118.2	14.89	3	4	4	4	309	35.5854	5.5415
	P97370	Sodium/potassium-transporting ATPase subunit beta-3 OS	Atp1b3	1.0203	1.18456	1.14009	82.3333	7.91	1	2	2	3	278	31.7552	8.51416
	P47753	F-actin-capping protein subunit alpha-1 OS	Capza1	1.16038	1.13846	1.13894	181.088	15.73	1	2	3	5	286	32.9193	5.5542
	Q8VDD5	Myosin-9 OS	Myh9	0.930751	1.03292	1.13889	3059.62	29.95	1	41	57	122	1960	226.232	5.65576
	P16858	Glyceraldehyde-3-phosphate dehydrogenase OS	Gapdh	0.955066	1.22909	1.13787	1523.38	50.45	2	13	13	59	333	35.7872	8.25049
	Q8VCM7	Fibrinogen gamma chain OS	Fgg	1.01492	0.655535	1.13638	306.748	10.78	1	5	5	13	436	49.3598	5.85889
	Q8K3K7	1-acyl-sn-glycerol-3-phosphate acyltransferase beta OS	Agpat2	1.33225	0.958742	1.13597	218.967	22.3	1	6	6	16	278	30.9902	8.88037
	Q8JZU2	Tricarboxylate transport protein, mitochondrial OS	Slc25a1	1.45143	0.971011	1.13535	463.96	18.01	1	6	6	20	311	33.9099	9.89111
	Q9WUU7	Cathepsin Z OS	Ctsz	0.987053	1.03656	1.1325	177.389	18.95	1	6	6	10	306	33.9742	6.59521
	P61971	Nuclear transport factor 2 OS	Nutf2	1.02404	1.26046	1.13172	75.682	6.3	1	1	1	4	127	14.469	5.37646
	P29758	Ornithine aminotransferase, mitochondrial OS	Oat	0.971664	1.13276	1.12902	106.09	13.44	1	4	4	4	439	48.3239	6.62451
	Q61578	NADPH:adrenodoxin oxidoreductase, mitochondrial OS	Fdxr	0.242392	1.02379	1.12624	50.2	4.05	1	2	2	3	494	54.1684	8.66064
	Q9D8U8	Sorting nexin-5 OS	Snx5	1.1359	1.02317	1.1241	95.87	4.7	1	2	2	5	404	46.7681	6.62451
	Q3ULJ0	Glycerol-3-phosphate dehydrogenase 1-like protein OS	Gpd1l	0.834852	1.29432	1.12153	152.009	13.68	1	3	5	7	351	38.2009	6.771
	Q91V64	Isochorismatase domain-containing protein 1 OS	Isoc1	0.992397	1.0204	1.1205	184.91	19.87	1	4	4	5	297	32.012	7.38623
	Q9DBF1	Alpha-aminoadipic semialdehyde dehydrogenase OS	Aldh7a1	0.941334	1.04851	1.11929	398.947	12.62	1	6	6	10	539	58.8243	7.47412
	P09528	Ferritin heavy chain OS	Fth1	1.5911	0.988496	1.11912	121.747	24.18	1	3	3	6	182	21.0533	5.88428
	Q8K0E8	Fibrinogen beta chain OS	Fgb	1.0163	0.718626	1.11841	314.534	22.87	2	11	11	19	481	54.7177	7.07861
	Q9JIW9	Ras-related protein Ral-B OS	Ralb	0.334184	1.07761	1.11821	72.4719	12.62	2	3	3	4	206	23.3349	6.62451
	Q9WUM5	Succinyl-CoA ligase [ADP/GDP-forming] subunit alpha, mitochondrial OS	Suclg1	1.08325	1.09654	1.11425	371.961	23.99	1	7	7	14	346	36.132	9.39307
	Q6P5E4	UDP-glucose:glycoprotein glucosyltransferase 1 OS	Uggt1	0.939076	1.11926	1.1141	150.77	3.87	1	6	6	8	1551	176.323	5.61768
	O88531	Palmitoyl-protein thioesterase 1 OS	Ppt1	1.01478	0.998263	1.11228	126.06	7.84	1	2	2	3	306	34.4674	8.00146
	B5X0G2	Major urinary protein 17 OS	Mup17	1.14127	1.33037	1.11115	114.16	27.22	3	1	3	5	180	20.6252	5.021
	Q9EQH3	Vacuolar protein sorting-associated protein 35 OS	Vps35	0.995164	1.0809	1.11043	701.117	17.96	1	13	13	25	796	91.6548	5.43994
	Q05816	Fatty acid-binding protein, epidermal OS	Fabp5	0.937744	1.07602	1.11018	551.248	56.3	1	6	6	20	135	15.1274	6.53662
	P62962	Profilin-1 OS	Pfn1	1.01643	1.13099	1.11003	1779.85	72.14	1	9	9	56	140	14.9475	8.27979
	Q64727	Vinculin OS	Vcl	0.793922	1.07488	1.10983	1532.86	31.14	1	28	28	55	1066	116.644	5.99854
	P54923	[Protein ADP-ribosylarginine] hydrolase OS	Adprh	0.928378	1.1599	1.10959	173.93	8.84	1	4	4	6	362	40.0424	5.75732
	Q9Z2I9	Succinyl-CoA ligase [ADP-forming] subunit beta, mitochondrial OS	Sucla2	1.07849	1.03074	1.10887	343.733	11.66	1	5	5	11	463	50.0821	7.00537
	Q9QYJ0	DnaJ homolog subfamily A member 2 OS	Dnaja2	0.716207	1.20097	1.10848	32.0767	7.04	1	3	3	4	412	45.7166	6.48096
	Q9QYB1	Chloride intracellular channel protein 4 OS	Clic4	0.769606	0.970339	1.10628	125.237	7.91	1	2	2	6	253	28.7107	5.59229
	P06745	Glucose-6-phosphate isomerase OS	Gpi	0.986787	1.0888	1.10403	680.163	21.68	1	10	10	28	558	62.7272	8.1333
	P26645	Myristoylated alanine-rich C-kinase substrate OS	Marcks	0.239834	1.15495	1.10352	538.116	37.86	1	5	5	15	309	29.6438	4.33545
	Q9D7G0	Ribose-phosphate pyrophosphokinase 1 OS	Prps1	0.991219	1.06005	1.10343	146.192	11.64	3	5	5	9	318	34.8119	6.97607
	Q8R1I1	Cytochrome b-c1 complex subunit 9 OS	Uqcr10	1.04332	0.9021	1.10202	103.323	39.06	1	2	2	3	64	7.44087	9.18799
	Q9CQM5	Thioredoxin domain-containing protein 17 OS	Txndc17	0.927681	1.01345	1.10177	114.999	18.7	1	2	2	3	123	14.0057	4.76709
	Q9EP69	Phosphatidylinositide phosphatase SAC1 OS	Sacm1l	1.02769	0.974045	1.10051	98.49	6.13	1	4	4	5	587	66.9009	7.29834
	Q3UW53	Protein Niban OS	Fam129a	0.738685	1.15692	1.10049	135.69	3.35	1	3	3	5	926	102.585	4.77979
	Q9DCC4	Pyrroline-5-carboxylate reductase 3 OS	Pycrl	0.895138	1.03884	1.10033	85.66	3.28	1	1	1	3	274	28.7027	7.26904
	P61027	Ras-related protein Rab-10 OS	Rab10	0.935181	1.01226	1.09924	627.462	29.5	16	4	6	21	200	22.5266	8.38232
	Q62230	Sialoadhesin OS	Siglec1	1.15175	0.968014	1.09753	108.327	2.01	1	3	3	4	1695	182.865	6.66846
	Q61207	Sulfated glycoprotein 1 OS	Psap	1.02442	1.05013	1.09388	1409.56	17.24	1	9	9	41	557	61.3814	5.18604
	Q9QUI0	Transforming protein RhoA OS	Rhoa	0.962086	1.02022	1.09177	273.493	33.16	3	6	6	14	193	21.7681	6.1001
	Q91X72	Hemopexin OS	Hpx	1.33713	0.628932	1.08936	2117.67	44.13	1	21	21	84	460	51.2852	7.79639
	Q921M7	Protein FAM49B OS	Fam49b	1.02573	1.02799	1.08899	80.8767	7.41	1	2	2	3	324	36.7527	6.06201
	Q9WUM4	Coronin-1C OS	Coro1c	0.0762064	1.04696	1.08792	92.8	4.01	1	2	2	3	474	53.087	7.07861
	Q923D2	Flavin reductase (NADPH) OS	Blvrb	1.00237	0.961151	1.08709	325.434	42.23	1	7	7	10	206	22.1834	7.00537
	P10852	4F2 cell-surface antigen heavy chain OS	Slc3a2	0.887011	1.09606	1.0856	74.4867	3.04	1	2	2	3	526	58.3003	5.90967
	O55022	Membrane-associated progesterone receptor component 1 OS	Pgrmc1	0.895312	0.888148	1.084	287.626	25.13	2	3	3	7	195	21.6808	4.70361
	Q8CAY6	Acetyl-CoA acetyltransferase, cytosolic OS	Acat2	1.02717	1.08311	1.08168	188.877	13.6	1	4	4	7	397	41.2712	7.50342
	Q8K354	Carbonyl reductase [NADPH] 3 OS	Cbr3	0.987295	1.00032	1.08144	118.37	12.64	1	3	4	7	277	30.9339	6.56592
	Q9CQI3	Glia maturation factor beta OS	Gmfb	0.982396	1.01941	1.08134	105.313	14.08	2	2	2	3	142	16.7124	5.16064
	P14733	Lamin-B1 OS	Lmnb1	0.16894	1.05408	1.07443	77.1133	5.1	3	3	3	3	588	66.7448	5.16064
	O55101	Synaptogyrin-2 OS	Syngr2	1.08728	1.09718	1.07309	47.3867	4.46	1	1	1	3	224	24.7622	4.77979
	P01027	Complement C3 OS	C3	1.07799	0.806832	1.07118	2652.61	34.16	1	53	53	104	1663	186.366	6.72705
	Q9D172	ES1 protein homolog, mitochondrial OS	D10Jhu81e	1.01124	1.0102	1.06993	215.007	16.92	1	3	3	6	266	28.0728	8.77783
	Q9CQ65	S-methyl-5'-thioadenosine phosphorylase OS	Mtap	0.940894	0.904172	1.06787	68.01	9.54	1	2	2	3	283	31.0417	7.13721
	P46638	Ras-related protein Rab-11B OS	Rab11b	1.01077	1.02011	1.06613	373.264	34.4	3	8	8	14	218	24.4745	5.93506
	Q9DBP5	UMP-CMP kinase OS	Cmpk1	1.00327	1.05174	1.06492	298.77	20.92	1	4	4	9	196	22.1513	5.8335
	P47754	F-actin-capping protein subunit alpha-2 OS	Capza2	1.11327	1.00759	1.06441	223.66	22.38	1	3	4	7	286	32.9466	5.84619
	P02469	Laminin subunit beta-1 OS	Lamb1	0.832692	1.20131	1.06304	59.28	1.06	1	2	2	4	1786	196.961	4.94482
	P21614	Vitamin D-binding protein OS	Gc	0.794464	1.01388	1.06128	819.594	41.6	1	13	13	37	476	53.565	5.50342
	Q9ES97	Reticulon-3 OS	Rtn3	0.908055	1.02191	1.06084	110.128	1.97	2	2	2	5	964	103.814	4.91943
	P51150	Ras-related protein Rab-7a OS	Rab7a	0.923268	1.02771	1.06061	253.025	35.27	1	6	6	9	207	23.4748	6.69775
	P62204	Calmodulin OS	Calm1	0.829953	1.08978	1.05954	284.96	50.34	3	7	7	18	149	16.8268	4.22119
	Q9CYZ2	Tumor protein D54 OS	Tpd52l2	0.946873	1.02434	1.05849	161.65	29.09	1	5	5	7	220	24.0281	6.15088
	Q8VCW8	Acyl-CoA synthetase family member 2, mitochondrial OS	Acsf2	1.0194	0.992366	1.05762	374.538	14.63	1	8	8	14	615	67.907	8.17725
	Q99P72	Reticulon-4 OS	Rtn4	0.970141	0.908445	1.0558	96.4	1.89	1	2	2	3	1162	126.535	4.53857
	P14602	Heat shock protein beta-1 OS	Hspb1	0.782443	0.979314	1.0552	142.147	29.67	1	5	5	6	209	22.9997	6.55127
	P28474	Alcohol dehydrogenase class-3 OS	Adh5	0.970555	1.04238	1.05379	406.894	24.6	2	8	8	17	374	39.5221	7.25439
	Q9D6R2	Isocitrate dehydrogenase [NAD] subunit alpha, mitochondrial OS	Idh3a	0.972579	1.03029	1.05329	392.883	24.04	1	8	8	18	366	39.6131	6.72705
	Q7M6Y3	Phosphatidylinositol-binding clathrin assembly protein OS	Picalm	1.01664	0.862766	1.0527	75.6467	3.18	1	2	2	3	660	71.4983	7.91357
	Q58A65	C-Jun-amino-terminal kinase-interacting protein 4 OS	Spag9	0.665633	0.976271	1.05138	72.7	1.97	1	2	2	3	1321	146.129	5.14795
	P63268	Actin, gamma-enteric smooth muscle OS	Actg2	0.898778	1.0719	1.04962	4269.26	51.33	4	5	14	219	376	41.8498	5.47803
	Q9CR86	Calcium-regulated heat stable protein 1 OS	Carhsp1	0.896142	1.03521	1.04955	91.7933	16.22	1	2	2	3	148	16.0521	8.20654
	Q9DBJ1	Phosphoglycerate mutase 1 OS	Pgam1	0.947098	1.07167	1.04835	564.743	30.71	2	8	8	22	254	28.8139	7.18115
	Q9R0P3	S-formylglutathione hydrolase OS	Esd	0.950743	1.00942	1.04694	305.467	20.92	1	5	5	9	282	31.2993	7.12256
	Q05421	Cytochrome P450 2E1 OS	Cyp2e1	1.58047	0.856611	1.04566	94.6	5.27	1	3	3	5	493	56.7686	8.39697
	P31786	Acyl-CoA-binding protein OS	Dbi	1.04007	1.03785	1.04499	463.299	47.13	1	3	3	26	87	9.99414	8.82178
	Q8CG76	Aflatoxin B1 aldehyde reductase member 2 OS	Akr7a2	0.764907	1.08961	1.04358	147.07	13.08	1	4	4	5	367	40.5862	8.11865
	Q9DCD0	6-phosphogluconate dehydrogenase, decarboxylating OS	Pgd	1.10602	1.01902	1.04249	1586.03	31.88	1	13	13	45	483	53.2131	7.2251
	P18572	Basigin OS	Bsg	0.887932	0.971361	1.04244	117.65	5.66	1	2	2	4	389	42.4183	5.84619
	P17182	Alpha-enolase OS	Eno1	0.971044	1.03668	1.04061	2801.77	54.38	3	19	19	83	434	47.1112	6.80029
	Q2VLH6	Scavenger receptor cysteine-rich type 1 protein M130 OS	Cd163	1.04306	1.00028	1.04046	130.9	2.41	1	2	2	4	1121	120.842	6.23975
	Q8VI36	Paxillin OS	Pxn	1.00134	1.17971	1.03553	52.0715	5.25	1	3	3	3	591	64.4348	6.02393
	P05064	Fructose-bisphosphate aldolase A OS	Aldoa	0.819948	1.19021	1.03534	1020.73	31.59	2	11	13	32	364	39.3313	8.08936
	Q61830	Macrophage mannose receptor 1 OS	Mrc1	0.996401	1.01685	1.03519	145.76	2.82	1	4	4	5	1456	164.874	6.82959
	O88543	COP9 signalosome complex subunit 3 OS	Cops3	0.713242	1.27954	1.03418	71.7167	3.55	1	2	2	3	423	47.801	6.65381
	Q9QZ88	Vacuolar protein sorting-associated protein 29 OS	Vps29	1.001	1.03737	1.03407	160.297	11.54	1	2	2	6	182	20.4827	6.78564
	Q9D051	Pyruvate dehydrogenase E1 component subunit beta, mitochondrial OS	Pdhb	1.06231	0.994976	1.03341	627.581	33.15	1	10	10	21	359	38.912	6.87354
	Q61129	Complement factor I OS	Cfi	0.938206	0.927647	1.03246	97.06	4.98	1	3	3	5	603	67.2165	7.45947
	P40124	Adenylyl cyclase-associated protein 1 OS	Cap1	1.04164	1.0219	1.03148	889.52	29.96	1	11	11	31	474	51.5324	7.51807
	Q60714	Long-chain fatty acid transport protein 1 OS	Slc27a1	1.24802	1.01212	1.03067	385.132	15.63	1	9	9	12	646	71.2306	8.38232
	P26883	Peptidyl-prolyl cis-trans isomerase FKBP1A OS	Fkbp1a	0.790352	1.04156	1.03023	163.223	12.04	1	1	1	3	108	11.9151	8.1626
	P60766	Cell division control protein 42 homolog OS	Cdc42	1.00234	0.999246	1.03015	790.415	48.17	4	7	8	27	191	21.245	6.55127
	Q9D379	Epoxide hydrolase 1 OS	Ephx1	0.939936	0.782588	1.02914	223.453	10.55	1	6	6	10	455	52.543	8.35303
	Q8K2B3	Succinate dehydrogenase [ubiquinone] flavoprotein subunit, mitochondrial OS	Sdha	1.04563	1.03472	1.02861	426.04	19.13	1	12	12	22	664	72.5392	7.37158
	Q9WTI7	Unconventional myosin-Ic OS	Myo1c	0.896932	0.980105	1.0271	125.48	5.46	2	7	7	8	1063	121.868	9.34912
	Q9JLJ2	4-trimethylaminobutyraldehyde dehydrogenase OS	Aldh9a1	1.06158	0.948417	1.02668	244.069	13.36	1	5	5	10	494	53.4801	6.97607
	Q93092	Transaldolase OS	Taldo1	0.916098	1.04782	1.02525	805.399	35.01	1	14	14	41	337	37.3634	7.03467
	Q99JT2	Serine/threonine-protein kinase MST4 OS	Mst4	1.00017	1.08944	1.02507	83.86	5.29	3	2	2	4	416	46.5847	5.23682
	Q9QZA0	Carbonic anhydrase 5B, mitochondrial OS	Ca5b	1.1224	1.03628	1.02498	107.143	11.36	1	3	3	3	317	36.5996	7.31299
	P35486	Pyruvate dehydrogenase E1 component subunit alpha, somatic form, mitochondrial OS	Pdha1	1.04666	0.962904	1.02275	789.194	35.13	2	14	14	36	390	43.2036	8.19189
	Q8BMF4	Dihydrolipoyllysine-residue acetyltransferase component of pyruvate dehydrogenase complex, mitochondrial OS	Dlat	1.18428	1.04266	1.02267	443.048	14.17	1	8	8	13	642	67.8987	8.57275
	Q07076	Annexin A7 OS	Anxa7	0.963219	0.960141	1.02241	139.52	7.34	1	3	3	5	463	49.8933	6.17627
	Q99KI0	Aconitate hydratase, mitochondrial OS	Aco2	1.12943	1.02172	1.02234	1712.98	32.56	1	23	23	67	780	85.41	7.92822
	O08749	Dihydrolipoyl dehydrogenase, mitochondrial OS	Dld	1.02165	0.984043	1.02179	485.761	22.79	1	10	10	17	509	54.2382	7.89893
	P62137	Serine/threonine-protein phosphatase PP1-alpha catalytic subunit OS	Ppp1ca	1.04371	1.03232	1.0195	232.386	26.97	2	2	7	11	330	37.5158	6.32861
	Q921G7	Electron transfer flavoprotein-ubiquinone oxidoreductase, mitochondrial OS	Etfdh	0.995626	0.978636	1.01784	145.515	6.17	1	4	4	5	616	68.0476	7.57666
	Q11136	Xaa-Pro dipeptidase OS	Pepd	0.946921	1.04712	1.01516	36.9533	3.25	1	2	2	4	493	54.993	5.78271
	Q9DAD6	Profilin-3 OS	Pfn3	1.1028	1.34178	1.01497	57.1156	6.57	1	1	1	3	137	14.6876	8.39697
	Q07417	Short-chain specific acyl-CoA dehydrogenase, mitochondrial OS	Acads	1.05199	0.983834	1.01451	320.044	20.63	1	7	7	9	412	44.8611	8.47021
	Q9Z0S1	3'(2'),5'-bisphosphate nucleotidase 1 OS	Bpnt1	1.02497	0.980116	1.01402	49.2609	10.39	1	3	3	3	308	33.1751	5.8208
	Q9CPU0	Lactoylglutathione lyase OS	Glo1	1.01024	1.02947	1.01166	86.38	13.04	1	3	3	4	184	20.7964	5.46533
	Q8R2Y2	Cell surface glycoprotein MUC18 OS	Mcam	0.810314	0.909439	1.01004	78.86	3.7	1	3	3	4	648	71.5005	5.8335
	Q8QZR5	Alanine aminotransferase 1 OS	Gpt	0.926726	0.987156	1.00918	245.464	9.68	1	4	4	10	496	55.107	6.63916
	Q62261	Spectrin beta chain, non-erythrocytic 1 OS	Sptbn1	0.797421	0.914435	1.00828	225.631	3.39	1	7	9	14	2363	274.052	5.57959
	O55013	Trafficking protein particle complex subunit 3 OS	Trappc3	0.757543	0.988086	1.00778	122.4	14.44	1	3	3	5	180	20.2892	4.95752
	Q60597	2-oxoglutarate dehydrogenase, mitochondrial OS	Ogdh	0.931235	0.999944	1.00735	393.225	12.61	1	12	12	24	1023	116.375	6.82959
	Q6WVG3	BTB/POZ domain-containing protein KCTD12 OS	Kctd12	0.9746	1.08963	1.00713	138.522	12.84	2	5	5	9	327	35.8698	5.80811
	P47757	F-actin-capping protein subunit beta OS	Capzb	0.961504	0.999161	1.0071	267.373	13.36	1	3	3	9	277	31.3258	5.74463
	Q99PT1	Rho GDP-dissociation inhibitor 1 OS	Arhgdia	1.02323	0.975319	1.00704	523.803	26.96	1	5	5	16	204	23.3928	5.19873
	P51174	Long-chain specific acyl-CoA dehydrogenase, mitochondrial OS	Acadl	1.07479	0.901147	1.00612	799.621	32.33	1	12	12	33	430	47.8775	8.30908
	P16546	Spectrin alpha chain, non-erythrocytic 1 OS	Sptan1	0.857851	0.867816	1.00491	649.663	6.63	1	14	14	22	2472	284.422	5.32568
	Q9WVA4	Transgelin-2 OS	Tagln2	0.968869	0.995174	1.00436	698.31	66.83	1	12	12	30	199	22.3812	8.23584
	Q99LX0	Protein DJ-1 OS	Park7	0.965584	0.995768	1.00346	695.27	58.73	1	11	11	30	189	20.0084	6.771
	Q9WTP6	Adenylate kinase 2, mitochondrial OS	Ak2	1.12964	1.00868	1.00103	611.938	17.99	1	4	4	16	239	26.4517	7.38623
	Q9D819	Inorganic pyrophosphatase OS	Ppa1	1.18726	0.861306	1.00082	202.648	17.99	1	5	5	10	289	32.6462	5.60498
	P06801	NADP-dependent malic enzyme OS	Me1	1.20598	1.0544	1.00075	1441.74	57.52	1	24	24	73	572	63.9131	7.44482
	Q9WU78	Programmed cell death 6-interacting protein OS	Pdcd6ip	0.86881	1.02053	1.00014	319.516	9.55	1	7	7	12	869	95.9642	6.52197
	P60710	Actin, cytoplasmic 1 OS	Actb	1	1	1	6989.76	55.47	3	7	16	325	375	41.7097	5.47803
	P10605	Cathepsin B OS	Ctsb	0.901123	0.914012	0.996003	597.276	21.83	1	5	5	15	339	37.2557	5.90967
	P19157	Glutathione S-transferase P 1 OS	Gstp1	0.950273	0.959706	0.994689	445.87	45.24	2	6	6	18	210	23.5941	7.86963
	Q91ZA3	Propionyl-CoA carboxylase alpha chain, mitochondrial OS	Pcca	1.03962	0.950785	0.994332	138.01	7.46	1	5	5	8	724	79.8711	7.25439
	Q91YH5	Atlastin-3 OS	Atl3	0.939644	0.948508	0.993628	312.322	15.71	3	8	8	17	541	60.5366	6.1001
	P16125	L-lactate dehydrogenase B chain OS	Ldhb	0.948315	0.965701	0.99227	714.855	30.84	1	8	9	22	334	36.549	6.04932
	O35945	Aldehyde dehydrogenase, cytosolic 1 OS	Aldh1a7	1.06075	0.938097	0.991751	393.574	22.75	3	4	10	16	501	54.553	7.7085
	Q64314	Hematopoietic progenitor cell antigen CD34 OS	Cd34	0.869389	0.905534	0.989056	48.06	5.5	1	2	2	3	382	40.9571	5.30029
	Q9CZY3	Ubiquitin-conjugating enzyme E2 variant 1 OS	Ube2v1	0.864258	1.1028	0.98904	132.064	16.33	2	3	3	6	147	16.3442	7.95752
	Q5SWU9	Acetyl-CoA carboxylase 1 OS	Acaca	1.01287	1.08986	0.984613	3297.65	26.48	2	60	60	140	2345	265.088	6.39209
	Q8BH61	Coagulation factor XIII A chain OS	F13a1	1.0401	0.920202	0.982861	275.464	8.33	1	6	6	9	732	83.1547	5.92236
	P17751	Triosephosphate isomerase OS	Tpi1	0.913773	1.06133	0.982607	1247.1	39.46	1	11	11	39	299	32.1713	5.74463
	Q9QZ08	N-acetyl-D-glucosamine kinase OS	Nagk	0.950417	0.966686	0.982291	67.1267	10.79	1	3	3	3	343	37.2448	5.73193
	P20108	Thioredoxin-dependent peroxide reductase, mitochondrial OS	Prdx3	0.90429	0.905434	0.981988	162.926	11.28	1	3	3	5	257	28.1094	7.57666
	Q9D2G2	Dihydrolipoyllysine-residue succinyltransferase component of 2-oxoglutarate dehydrogenase complex, mitochondrial OS	Dlst	1.02453	1.01578	0.981642	240.047	15.2	1	6	6	16	454	48.9635	8.95361
	Q91ZJ5	UTP--glucose-1-phosphate uridylyltransferase OS	Ugp2	0.958192	1.097	0.978679	86.03	7.48	1	3	3	4	508	56.9437	7.60596
	P63001	Ras-related C3 botulinum toxin substrate 1 OS	Rac1	0.887298	1.00757	0.97747	623.45	34.9	5	4	7	22	192	21.4362	8.49951
	P08752	Guanine nucleotide-binding protein G(i) subunit alpha-2 OS	Gnai2	0.853682	0.974933	0.976325	712.505	21.69	9	4	7	23	355	40.463	5.45264
	P11276	Fibronectin OS	Fn1	0.840225	0.960523	0.974865	96.5033	0.89	1	2	2	3	2477	272.368	5.59229
	P31428	Dipeptidase 1 OS	Dpep1	0.952689	0.882784	0.972823	150.583	6.83	1	3	3	6	410	45.6932	6.3667
	Q05920	Pyruvate carboxylase, mitochondrial OS	Pc	1.15921	0.953818	0.971162	3258.16	43.29	1	42	42	142	1178	129.602	6.7124
	O08529	Calpain-2 catalytic subunit OS	Capn2	0.897058	0.999274	0.969683	441.367	14	1	9	9	16	700	79.8218	4.95752
	O35682	Myeloid-associated differentiation marker OS	Myadm	0.743402	0.94885	0.966829	194.447	10.94	1	3	3	6	320	35.2613	8.30908
	Q04447	Creatine kinase B-type OS	Ckb	0.918292	1.0437	0.966344	261.535	16.01	1	5	5	8	381	42.6863	5.66846
	P50285	Dimethylaniline monooxygenase [N-oxide-forming] 1 OS	Fmo1	1.13033	0.965335	0.965257	277.317	15.41	1	8	8	12	532	59.876	8.47021
	Q3TW96	UDP-N-acetylhexosamine pyrophosphorylase-like protein 1 OS	Uap1l1	0.95588	0.946136	0.96293	135.441	10.85	1	5	5	7	507	56.5777	5.42725
	P20152	Vimentin OS	Vim	0.893973	0.962939	0.9606	3755.17	70.82	7	29	34	165	466	53.6551	5.12256
	Q62264	Thyroid hormone-inducible hepatic protein OS	Thrsp	0.995801	1.02175	0.960189	395.39	45.33	1	5	5	12	150	17.0824	4.98291
	P26443	Glutamate dehydrogenase 1, mitochondrial OS	Glud1	1.07453	0.962994	0.960167	340.333	23.12	1	10	10	15	558	61.2982	8.00146
	Q00612	Glucose-6-phosphate 1-dehydrogenase X OS	G6pdx	1.03125	0.983762	0.959996	692.098	33.4	2	18	18	42	515	59.2248	6.49365
	Q9WUM3	Coronin-1B OS	Coro1b	0.998684	0.975319	0.957781	222.794	16.74	1	9	9	15	484	53.878	5.78271
	P11438	Lysosome-associated membrane glycoprotein 1 OS	Lamp1	0.91132	0.967411	0.957447	226.019	14.78	1	3	3	7	406	43.8373	8.39697
	Q8K4Z3	NAD(P)H-hydrate epimerase OS	Apoa1bp	0.933864	1.14912	0.956092	66.06	6.74	1	2	2	3	282	30.9528	7.69385
	Q62465	Synaptic vesicle membrane protein VAT-1 homolog OS	Vat1	1.13048	0.907416	0.955303	353.17	17.24	1	5	5	8	406	43.069	6.3667
	Q9R111	Guanine deaminase OS	Gda	1.22327	0.7568	0.954883	97.43	6.83	1	3	3	5	454	50.9807	5.52881
	Q06890	Clusterin OS	Clu	0.796919	0.607578	0.954488	138.92	10.27	1	5	5	8	448	51.6226	5.66846
	Q61285	ATP-binding cassette sub-family D member 2 OS	Abcd2	0.51066	0.749536	0.94949	83.44	3.91	1	3	3	4	741	83.4297	9.08545
	P58389	Serine/threonine-protein phosphatase 2A activator OS	Ppp2r4	1.0422	0.991861	0.949178	87.4453	12.38	1	4	4	4	323	36.6867	6.39209
	O08709	Peroxiredoxin-6 OS	Prdx6	0.942098	0.918726	0.946993	575.043	41.07	1	9	9	24	224	24.855	6.01123
	P24527	Leukotriene A-4 hydrolase OS	Lta4h	0.98263	0.907404	0.946738	313.92	11.95	1	6	6	10	611	69.0071	6.41748
	Q3U7R1	Extended synaptotagmin-1 OS	Esyt1	0.972347	0.916594	0.946573	418.308	11.72	1	11	11	18	1092	121.478	5.94775
	Q8C0N2	Glycerol-3-phosphate acyltransferase 3 OS	Agpat9	0.977962	0.894267	0.94633	166.26	5.02	1	2	2	4	438	48.9687	8.93896
	P21279	Guanine nucleotide-binding protein G(q) subunit alpha OS	Gnaq	0.201864	0.826614	0.944946	88.6184	6.96	3	3	3	4	359	42.1313	5.68115
	Q8CHT0	Delta-1-pyrroline-5-carboxylate dehydrogenase, mitochondrial OS	Aldh4a1	1.22685	0.865303	0.944593	269.328	8.72	1	5	5	9	562	61.8015	8.23584
	Q91V92	ATP-citrate synthase OS	Acly	0.932339	1.10162	0.941786	4402.7	44.45	1	44	44	175	1091	119.651	7.44482
	P07356	Annexin A2 OS	Anxa2	0.781171	1.00014	0.941275	555.649	33.92	1	10	10	21	339	38.6518	7.69385
	P48758	Carbonyl reductase [NADPH] 1 OS	Cbr1	1.01719	0.895463	0.939605	324.94	37.55	1	7	8	16	277	30.622	8.30908
	P11352	Glutathione peroxidase 1 OS	Gpx1	0.988446	0.804029	0.938777	118.115	32.34	1	5	5	9	201	22.3162	7.21045
	P31324	cAMP-dependent protein kinase type II-beta regulatory subunit OS	Prkar2b	0.857254	0.859762	0.938663	445.81	22.36	2	7	7	15	416	46.138	4.98291
	Q9D1K2	V-type proton ATPase subunit F OS	Atp6v1f	0.776543	0.891103	0.938576	72.9767	26.89	1	2	2	3	119	13.362	5.8208
	P03953	Complement factor D OS	Cfd	1.25335	0.7419	0.938533	234.91	16.6	1	2	2	4	259	28.0387	6.66846
	Q9R257	Heme-binding protein 1 OS	Hebp1	0.793464	0.865658	0.938294	63.09	12.63	1	2	2	3	190	21.0534	5.26221
	Q9CQI6	Coactosin-like protein OS	Cotl1	0.904186	1.01491	0.93777	501.077	64.79	1	8	8	24	142	15.934	5.40186
	P50396	Rab GDP dissociation inhibitor alpha OS	Gdi1	0.917191	0.926179	0.934292	199.423	11.19	1	2	4	7	447	50.4891	5.08447
	Q9CPQ8	ATP synthase subunit g, mitochondrial OS	Atp5l	0.954536	1.22805	0.931755	45.2176	25.24	1	2	2	3	103	11.4172	9.74463
	P16045	Galectin-1 OS	Lgals1	0.858209	1.02325	0.929444	1269.95	46.67	1	6	6	49	135	14.8562	5.49072
	P14824	Annexin A6 OS	Anxa6	0.775654	1.22206	0.922608	886.674	31.35	1	21	21	39	673	75.8374	5.50342
	Q99MR8	Methylcrotonoyl-CoA carboxylase subunit alpha, mitochondrial OS	Mccc1	0.988672	0.90331	0.921788	132.133	5.44	1	4	4	6	717	79.2934	7.82568
	P28654	Decorin OS	Dcn	0.796651	0.954434	0.921476	27.9	4.24	1	2	2	3	354	39.7839	8.67529
	O70318	Band 4.1-like protein 2 OS	Epb41l2	0.850545	0.909432	0.919916	374.218	13.26	2	12	12	16	988	109.873	5.42725
	P41216	Long-chain-fatty-acid--CoA ligase 1 OS	Acsl1	1.01878	0.891434	0.912487	2304.14	46.78	3	30	30	105	699	77.9014	7.15186
	P06151	L-lactate dehydrogenase A chain OS	Ldha	0.935581	0.942199	0.911307	1432.88	48.19	2	14	15	54	332	36.4752	7.73779
	P62874	Guanine nucleotide-binding protein G(I)/G(S)/G(T) subunit beta-1 OS	Gnb1	0.963421	0.909293	0.908426	742.373	25.88	2	3	7	24	340	37.353	5.99854
	Q9DBS1	Transmembrane protein 43 OS	Tmem43	0.943319	0.862855	0.907293	130.368	6.5	1	3	3	5	400	44.7551	7.35693
	Q62523	Zyxin OS	Zyx	0.874417	0.888286	0.906814	56.7967	7.27	1	3	3	3	564	60.5068	6.40479
	P50247	Adenosylhomocysteinase OS	Ahcy	0.931904	1.09646	0.905995	326.437	26.62	1	11	11	18	432	47.6573	6.53662
	P47738	Aldehyde dehydrogenase, mitochondrial OS	Aldh2	1.10503	0.893149	0.905369	1964.23	52.41	4	20	22	66	519	56.5018	7.62061
	P97823	Acyl-protein thioesterase 1 OS	Lypla1	0.953354	1.01188	0.905347	88.0703	8.26	1	2	2	3	230	24.6714	6.62451
	Q9ET01	Glycogen phosphorylase, liver form OS	Pygl	0.962372	0.932916	0.905243	409.747	15.29	1	10	13	20	850	97.401	7.09326
	P61226	Ras-related protein Rap-2b OS	Rap2b	0.935759	0.889419	0.904709	163.977	9.84	3	2	2	4	183	20.4912	4.80518
	P63094	Guanine nucleotide-binding protein G(s) subunit alpha isoforms short OS	Gnas	0.837752	0.831652	0.903489	311.472	13.45	9	4	5	10	394	45.6349	5.96045
	P29391	Ferritin light chain 1 OS	Ftl1	2.44117	0.64882	0.902565	480.438	38.8	2	7	7	16	183	20.7895	5.99854
	Q9CYH2	Redox-regulatory protein FAM213A OS	Fam213a	0.959613	0.804388	0.902377	224.302	22.02	1	5	5	9	218	24.3789	9.17334
	Q99JI6	Ras-related protein Rap-1b OS	Rap1b	0.807273	1.00264	0.902287	426.287	31.52	2	6	6	16	184	20.8116	5.78271
	Q99MN9	Propionyl-CoA carboxylase beta chain, mitochondrial OS	Pccb	1.15368	0.876835	0.898928	158.03	10.17	1	4	4	5	541	58.3719	7.66455
	P20918	Plasminogen OS	Plg	0.803977	0.862275	0.896424	267.085	5.79	1	4	4	8	812	90.7489	6.59521
	Q61553	Fascin OS	Fscn1	0.80785	1.21519	0.895726	337.333	17.44	1	8	8	14	493	54.4739	6.88818
	P85094	Isochorismatase domain-containing protein 2A, mitochondrial OS	Isoc2a	0.992931	0.734977	0.893165	189.154	40.78	1	5	5	8	206	22.403	8.01611
	P22599	Alpha-1-antitrypsin 1-2 OS	Serpina1b	0.899213	1.09624	0.893156	1820.86	41.89	3	4	14	82	413	45.9455	5.5415
	P62880	Guanine nucleotide-binding protein G(I)/G(S)/G(T) subunit beta-2 OS	Gnb2	0.925591	0.82349	0.892724	1012.96	35	3	6	10	31	340	37.3071	5.99854
	P45376	Aldose reductase OS	Akr1b1	0.959261	0.900883	0.891099	894.213	50	2	14	15	47	316	35.7095	7.18115
	P63158	High mobility group protein B1 OS	Hmgb1	0.848916	0.885867	0.890736	31.03	15.35	1	3	3	4	215	24.8782	5.74463
	Q9DBD0	Inhibitor of carbonic anhydrase OS	Ica	0.832886	0.787835	0.887338	251.963	5	1	3	4	20	700	76.7155	7.25439
	Q61704	Inter-alpha-trypsin inhibitor heavy chain H3 OS	Itih3	0.213334	0.614602	0.887094	42.25	1.12	1	1	1	3	889	99.2957	6.04932
	Q9DBL9	1-acylglycerol-3-phosphate O-acyltransferase ABHD5 OS	Abhd5	1.05815	0.689679	0.886931	251.245	16.24	1	4	4	8	351	39.1298	6.78564
	Q9JM14	5'(3')-deoxyribonucleotidase, cytosolic type OS	Nt5c	1.04154	1.16859	0.886736	90.78	11	1	2	2	3	200	23.0618	5.49072
	P84084	ADP-ribosylation factor 5 OS	Arf5	0.829669	1.50309	0.886613	470.487	35	1	1	5	15	180	20.5166	6.78564
	Q9DAS9	Guanine nucleotide-binding protein G(I)/G(S)/G(O) subunit gamma-12 OS	Gng12	0.793632	0.82655	0.885101	151.77	25	1	2	2	5	72	7.99212	8.96826
	P19096	Fatty acid synthase OS	Fasn	0.967593	1.0367	0.884461	14642.2	55.03	1	107	107	616	2504	272.257	6.58057
	Q8BPB5	EGF-containing fibulin-like extracellular matrix protein 1 OS	Efemp1	0.187918	0.839184	0.881416	77.74	3.65	1	2	2	3	493	54.9163	5.13525
	Q64521	Glycerol-3-phosphate dehydrogenase, mitochondrial OS	Gpd2	1.1012	0.826526	0.878201	407.033	18.02	1	12	12	15	727	80.9025	6.60986
	Q63918	Serum deprivation-response protein OS	Sdpr	0.760156	0.905583	0.877785	760.833	35.65	1	14	14	28	418	46.7354	5.21143
	Q9D9V3	Ethylmalonyl-CoA decarboxylase OS	Echdc1	1.29588	0.750607	0.877463	372.617	21.12	1	7	7	19	322	35.4444	7.00537
	P09813	Apolipoprotein A-II OS	Apoa2	0.637505	0.89551	0.87545	322.097	18.63	1	2	2	14	102	11.3017	7.18115
	O08553	Dihydropyrimidinase-related protein 2 OS	Dpysl2	0.96064	0.877503	0.874876	772.62	30.07	1	12	13	25	572	62.2386	6.37939
	O08677	Kininogen-1 OS	Kng1	0.804699	0.787121	0.874551	830.189	20.27	1	12	12	29	661	73.0564	6.53662
	Q91ZX7	Prolow-density lipoprotein receptor-related protein 1 OS	Lrp1	1.0089	0.888992	0.872449	50.56	0.59	1	3	3	5	4545	504.411	5.36377
	Q921I1	Serotransferrin OS	Tf	0.909474	0.835254	0.871324	4487.68	56.38	1	38	40	216	697	76.6737	7.18115
	O35639	Annexin A3 OS	Anxa3	1.02772	0.805825	0.870768	364.354	40.25	2	11	11	18	323	36.3616	5.75732
	Q8CI94	Glycogen phosphorylase, brain form OS	Pygb	0.961678	0.90818	0.869785	549.055	14.83	2	10	13	19	843	96.6685	6.72705
	Q8BH64	EH domain-containing protein 2 OS	Ehd2	0.877644	0.719077	0.869306	451.687	22.47	1	11	12	31	543	61.1358	6.50732
	P99029	Peroxiredoxin-5, mitochondrial OS	Prdx5	1.02734	0.883574	0.86822	738.427	40.48	1	9	9	28	210	21.8835	8.85107
	P48036	Annexin A5 OS	Anxa5	0.893441	0.884426	0.864622	1725.08	69.91	1	19	19	74	319	35.7302	4.95752
	Q91VW3	SH3 domain-binding glutamic acid-rich-like protein 3 OS	Sh3bgrl3	0.934112	0.992443	0.862715	375.423	47.31	1	5	5	14	93	10.4703	5.13525
	P31001	Desmin OS	Des	0.879189	0.932842	0.861776	658.01	13.86	1	3	7	26	469	53.465	5.2749
	Q64105	Sepiapterin reductase OS	Spr	0.986889	0.877612	0.860102	227.969	20.31	1	4	4	7	261	27.8654	5.74463
	P35505	Fumarylacetoacetase OS	Fah	0.892697	1.02801	0.854268	281.293	14.32	1	5	5	6	419	46.146	7.18115
	Q99LC5	Electron transfer flavoprotein subunit alpha, mitochondrial OS	Etfa	1.03766	0.811197	0.851131	1089.09	53.75	1	14	14	39	333	34.9875	8.38232
	P42125	Enoyl-CoA delta isomerase 1, mitochondrial OS	Eci1	1.03282	0.767183	0.849087	179.53	27.68	1	6	6	9	289	32.2298	8.98291
	P29351	Tyrosine-protein phosphatase non-receptor type 6 OS	Ptpn6	1.14893	0.961302	0.846712	112.52	7.9	1	4	4	6	595	67.5172	7.81104
	Q9Z0Y1	Dynactin subunit 3 OS	Dctn3	0.942389	1.07052	0.841068	48.37	9.14	1	2	2	3	186	20.9653	6.06201
	P14152	Malate dehydrogenase, cytoplasmic OS	Mdh1	0.992709	0.887867	0.840888	1417.45	45.51	1	15	15	66	334	36.4881	6.58057
	P06800	Receptor-type tyrosine-protein phosphatase C OS	Ptprc	0.997206	0.94568	0.837784	155.46	4.11	1	5	5	7	1291	144.514	5.93506
	O35678	Monoglyceride lipase OS	Mgll	0.783365	0.820221	0.837165	382.66	41.58	1	10	10	22	303	33.366	7.15186
	Q60854	Serpin B6 OS	Serpinb6	0.997479	0.832825	0.836808	514.021	31.48	1	11	11	21	378	42.5712	5.74463
	Q9WUA3	6-phosphofructokinase type C OS	Pfkp	1.01364	0.962473	0.835856	151.027	5.74	2	4	5	7	784	85.4003	7.10791
	P32261	Antithrombin-III OS	Serpinc1	0.789277	0.908107	0.832869	250.889	21.29	1	9	9	18	465	51.9706	6.45557
	Q9Z0F7	Gamma-synuclein OS	Sncg	0.740638	0.76202	0.829746	598.051	63.41	2	7	7	17	123	13.1516	4.65283
	Q9CQV8	14-3-3 protein beta/alpha OS	Ywhab	0.88393	0.838493	0.826901	2324.99	47.56	1	5	10	87	246	28.0689	4.83057
	O35598	Disintegrin and metalloproteinase domain-containing protein 10 OS	Adam10	0.629264	0.829151	0.826698	22.61	1.6	1	1	1	3	749	83.9138	7.94287
	P32020	Non-specific lipid-transfer protein OS	Scp2	1.04226	0.804073	0.825609	200.715	5.67	1	4	4	8	547	59.0878	7.44482
	Q9DCW4	Electron transfer flavoprotein subunit beta OS	Etfb	0.959492	0.855717	0.824938	715.133	37.25	1	9	9	23	255	27.606	8.104
	Q9D7J7	Calpain small subunit 2 OS	Capns2	0.861772	0.884773	0.821288	44.74	2.83	2	1	1	4	247	27.1725	5.47803
	Q61838	Alpha-2-macroglobulin OS	A2m	0.916247	0.719349	0.817489	2129.84	19.2	2	29	29	101	1495	165.748	6.68311
	Q9Z1E4	Glycogen [starch] synthase, muscle OS	Gys1	1.00215	0.807161	0.816466	93.42	5.56	1	3	3	4	738	83.8735	6.11279
	Q9WTQ5	A-kinase anchor protein 12 OS	Akap12	0.124455	0.858188	0.813977	170.84	3.38	1	4	4	6	1684	180.586	4.43701
	P35762	CD81 antigen OS	Cd81	0.835417	0.805605	0.813247	188.66	9.32	1	1	1	3	236	25.7972	5.8335
	P61982	14-3-3 protein gamma OS	Ywhag	0.938634	0.79272	0.813242	2074.83	45.75	1	6	11	80	247	28.2849	4.89404
	Q8CFX1	GDH/6PGL endoplasmic bifunctional protein OS	H6pd	0.885136	0.799807	0.810157	128.857	5.7	1	4	4	6	789	88.8717	6.93213
	Q6P069	Sorcin OS	Sri	0.943151	0.872865	0.808194	198.867	24.75	1	5	5	6	198	21.6133	5.59229
	P10833	Ras-related protein R-Ras OS	Rras	0.873428	0.830611	0.805585	181.105	13.76	2	3	3	6	218	23.749	6.78564
	Q9DBE0	Cysteine sulfinic acid decarboxylase OS	Csad	0.944762	0.745848	0.804769	483.86	16.02	1	7	7	16	493	55.1094	6.60986
	Q99LH1	Nucleolar GTP-binding protein 2 OS	Gnl2	0.66338	0.880563	0.803918	68.03	0.96	1	1	1	4	728	83.2938	9.20264
	Q80SZ7	Guanine nucleotide-binding protein G(I)/G(S)/G(O) subunit gamma-5 OS	Gng5	0.698786	0.95606	0.797959	75.0437	23.53	1	2	2	7	68	7.31381	9.84717
	Q9CX80	Cytoglobin OS	Cygb	1.11732	0.70473	0.795201	64.7967	10.53	1	2	2	3	190	21.452	6.80029
	Q91XV3	Brain acid soluble protein 1 OS	Basp1	0.763772	0.781836	0.791824	154.98	31.42	1	4	4	4	226	22.0736	4.51318
	Q9D7N9	Adipocyte plasma membrane-associated protein OS	Apmap	0.932196	0.799024	0.791734	175.029	9.4	1	3	3	7	415	46.4047	6.31592
	Q99JY3	GTPase IMAP family member 4 OS	Gimap4	1.15675	0.837059	0.785985	102.4	17.35	1	4	4	4	219	24.5385	7.02002
	Q9DBB8	Trans-1,2-dihydrobenzene-1,2-diol dehydrogenase OS	Dhdh	1.09509	0.841877	0.782967	170.08	14.71	1	4	4	9	333	36.2777	6.44287
	P04117	Fatty acid-binding protein, adipocyte OS	Fabp4	0.918207	0.736043	0.779011	10028.8	68.18	3	9	9	536	132	14.6405	8.39697
	O88844	Isocitrate dehydrogenase [NADP] cytoplasmic OS	Idh1	0.954324	0.769668	0.776716	1125.13	48.55	1	18	19	65	414	46.6445	7.1665
	O54724	Polymerase I and transcript release factor OS	Ptrf	0.69242	0.766709	0.774872	844.944	30.61	1	10	10	35	392	43.927	5.51611
	Q8R0Y6	Cytosolic 10-formyltetrahydrofolate dehydrogenase OS	Aldh1l1	1.05415	0.791517	0.774498	560.882	20.73	2	16	16	34	902	98.6465	5.90967
	P29699	Alpha-2-HS-glycoprotein OS	Ahsg	0.809284	0.949784	0.771173	843.398	34.49	1	7	7	33	345	37.3017	6.50732
	Q8R0N6	Hydroxyacid-oxoacid transhydrogenase, mitochondrial OS	Adhfe1	0.0544099	0.762742	0.771164	73.5419	9.46	1	2	2	3	465	49.9053	7.57666
	Q9JHI5	Isovaleryl-CoA dehydrogenase, mitochondrial OS	Ivd	1.1908	0.754969	0.770992	333.013	18.87	1	7	7	12	424	46.2959	8.29443
	P15626	Glutathione S-transferase Mu 2 OS	Gstm2	0.944869	0.775796	0.768734	712.483	61.01	3	9	13	31	218	25.7	7.38623
	Q9QXG4	Acetyl-coenzyme A synthetase, cytoplasmic OS	Acss2	0.945585	1.003	0.766863	179.335	8.99	1	6	6	9	701	78.8112	6.63916
	Q8QZS1	3-hydroxyisobutyryl-CoA hydrolase, mitochondrial OS	Hibch	1.01839	0.810033	0.764903	250.383	17.92	1	7	7	12	385	43.0102	8.06006
	Q61233	Plastin-2 OS	Lcp1	1.08439	0.891071	0.763376	2415.68	58.37	2	23	29	94	627	70.1048	5.32568
	Q9D0F9	Phosphoglucomutase-1 OS	Pgm1	0.972176	0.735182	0.748903	1083.04	38.26	2	19	19	40	562	61.3796	6.56592
	P15105	Glutamine synthetase OS	Glul	0.915243	0.741606	0.746686	406.543	23.59	1	9	9	19	373	42.0923	7.07861
	P54310	Hormone-sensitive lipase OS	Lipe	0.976586	0.734139	0.740842	682.027	22.79	1	15	15	29	759	83.2947	6.94678
	Q00897	Alpha-1-antitrypsin 1-4 OS	Serpina1d	0.99529	0.886591	0.738408	1419.02	35.11	3	4	14	71	413	45.9694	5.43994
	Q8BH95	Enoyl-CoA hydratase, mitochondrial OS	Echs1	1.11745	0.629132	0.736855	585.243	30.69	1	8	8	21	290	31.4542	8.48486
	Q9QUH0	Glutaredoxin-1 OS	Glrx	0.793678	0.791656	0.733465	65.1033	6.54	1	1	1	3	107	11.8631	8.36768
	P53395	Lipoamide acyltransferase component of branched-chain alpha-keto acid dehydrogenase complex, mitochondrial OS	Dbt	1.10702	0.808805	0.730869	71.64	6.85	1	3	3	3	482	53.2129	8.60205
	P41731	CD63 antigen OS	Cd63	0.802278	0.823833	0.720153	112.606	7.56	1	2	2	5	238	25.7492	6.97607
	Q08857	Platelet glycoprotein 4 OS	Cd36	0.819934	0.711803	0.719321	860.73	31.36	1	11	11	43	472	52.6642	8.35303
	P14483	H-2 class II histocompatibility antigen, A beta chain OS	H2-Ab1	1.30712	0.724374	0.716404	99.58	11.7	3	2	2	3	265	30.1092	7.23975
	P17563	Selenium-binding protein 1 OS	Selenbp1	0.986786	0.642147	0.713579	315.277	23.94	2	10	10	14	472	52.4804	6.29053
	P40936	Indolethylamine N-methyltransferase OS	Inmt	0.993226	0.650686	0.712492	619.85	32.95	1	8	8	21	264	29.4408	6.39209
	P07758	Alpha-1-antitrypsin 1-1 OS	Serpina1a	0.862452	0.834145	0.710368	1399.8	44.07	1	7	15	69	413	45.9735	5.71924
	E9Q3E1	Aldehyde dehydrogenase family 3 member B2 OS	Aldh3b2	1.19029	0.608266	0.710236	106.1	6.68	3	3	3	4	479	52.9489	6.0874
	Q00623	Apolipoprotein A-I OS	Apoa1	0.850569	0.559513	0.707533	1175.47	46.97	1	15	15	50	264	30.5966	5.73193
	P24270	Catalase OS	Cat	1.04387	0.601222	0.706345	1024.56	40.42	1	18	18	47	527	59.7577	7.88428
	Q9EQ20	Methylmalonate-semialdehyde dehydrogenase [acylating], mitochondrial OS	Aldh6a1	1.14091	0.648326	0.705516	1154.56	37.2	1	16	16	42	535	57.8785	8.07471
	P08228	Superoxide dismutase [Cu-Zn] OS	Sod1	0.862114	0.744901	0.703691	1430.43	41.56	1	7	7	48	154	15.9328	6.50732
	P56395	Cytochrome b5 OS	Cyb5a	0.914803	0.672462	0.703356	569.394	47.76	1	5	5	16	134	15.2315	5.07178
	P37040	NADPH--cytochrome P450 reductase OS	Por	0.907718	0.664995	0.695227	239.364	12.54	1	9	9	16	678	76.9953	5.52881
	P13707	Glycerol-3-phosphate dehydrogenase [NAD(+)], cytoplasmic OS	Gpd1	0.926245	0.739774	0.692835	1894.22	78.51	1	23	25	85	349	37.5484	7.1665
	Q61247	Alpha-2-antiplasmin OS	Serpinf2	0.806239	0.716601	0.690964	71.4943	9.78	1	5	5	7	491	54.9371	6.30322
	P07724	Serum albumin OS	Alb	0.872002	0.662847	0.688328	42851.6	81.74	1	50	50	2635	608	68.6477	6.07471
	Q9WVL0	Maleylacetoacetate isomerase OS	Gstz1	1.00945	0.643462	0.688092	500.28	61.57	1	9	9	20	216	24.2598	7.85498
	P16015	Carbonic anhydrase 3 OS	Ca3	0.96091	0.693108	0.685827	5238.37	68.85	1	15	15	260	260	29.3476	7.37158
	O35855	Branched-chain-amino-acid aminotransferase, mitochondrial OS	Bcat2	1.29222	0.684649	0.685756	513.245	17.56	1	5	5	13	393	44.0988	8.29443
	Q8BJ56	Patatin-like phospholipase domain-containing protein 2 OS	Pnpla2	0.904785	0.691188	0.682083	200.194	13.17	1	6	6	10	486	53.6225	6.45557
	P49817	Caveolin-1 OS	Cav1	0.603175	0.778749	0.678873	323.249	39.89	1	6	6	14	178	20.5255	6.02393
	P14069	Protein S100-A6 OS	S100a6	0.696002	0.71727	0.670281	157.738	24.72	1	3	3	11	89	10.0443	5.47803
	Q91WU0	Carboxylesterase 1F OS	Ces1f	0.865423	0.662818	0.661501	164.466	10.52	2	4	5	10	561	61.5732	6.48096
	P34914	Bifunctional epoxide hydrolase 2 OS	Ephx2	0.98858	0.597522	0.658398	402.563	19.31	1	6	6	15	554	62.4746	6.18896
	Q91VJ2	Protein kinase C delta-binding protein OS	Prkcdbp	0.616977	0.736129	0.656543	298.272	15	1	4	4	11	260	27.8366	5.56689
	P51885	Lumican OS	Lum	0.890071	0.782691	0.649238	920.018	29.88	1	9	9	33	338	38.2406	6.43018
	P06728	Apolipoprotein A-IV OS	Apoa4	0.663714	0.698178	0.633021	170.75	10.38	1	4	4	8	395	45.001	5.46533
	P13020	Gelsolin OS	Gsn	0.840248	0.605667	0.623591	884.075	20.64	1	15	15	45	780	85.8881	6.17627
	P01872	Ig mu chain C region OS	Ighm	0.561347	0.566536	0.623178	679.68	27.97	1	11	11	25	454	49.9403	7.00537
	O70423	Membrane primary amine oxidase OS	Aoc3	0.763351	0.631352	0.597	1816.5	29.02	2	16	16	75	765	84.4803	6.41748
	P10649	Glutathione S-transferase Mu 1 OS	Gstm1	0.939821	0.555455	0.596585	819.041	51.83	1	9	12	38	218	25.9531	7.94287
	Q61599	Rho GDP-dissociation inhibitor 2 OS	Arhgdib	1.0731	0.804057	0.591998	421.121	66	1	8	8	26	200	22.8365	5.10986
	P01029	Complement C4-B OS	C4b	0.998479	0.737329	0.585815	68.67	1.38	1	2	2	5	1738	192.794	7.53271
	Q8CGN5	Perilipin-1 OS	Plin1	0.69937	0.686601	0.584196	1378.83	47.78	1	18	18	42	517	55.5614	7.00537
	P62869	Transcription elongation factor B polypeptide 2 OS	Tceb2	0.251973	1.2341	0.575157	60.91	11.86	1	2	2	4	118	13.1616	5.0083
	P00329	Alcohol dehydrogenase 1 OS	Adh1	0.924997	0.556925	0.568758	358.61	19.2	1	7	7	14	375	39.7456	8.104
	P19973	Lymphocyte-specific protein 1 OS	Lsp1	0.936577	0.832508	0.566731	367.555	23.33	1	4	4	8	330	36.6918	4.81787
	P23953	Carboxylesterase 1C OS	Ces1c	0.915077	0.571025	0.544727	932.658	29.78	3	10	13	32	554	61.017	5.05908
	Q61554	Fibrillin-1 OS	Fbn1	0.666793	0.629819	0.544028	356.14	4.63	1	14	14	20	2873	312.083	4.91943
	O89053	Coronin-1A OS	Coro1a	1.03885	0.833039	0.541914	616.331	28.2	1	15	15	33	461	50.9569	6.48096
	Q80UG2	Plexin-A4 OS	Plxna4	1.02633	0.572589	0.53129	38.4265	0.48	1	1	1	3	1893	212.423	6.82959
	O89020	Afamin OS	Afm	0.904213	0.542906	0.527756	66.5996	2.47	1	2	2	3	608	69.3338	5.78271
	O88492	Perilipin-4 OS	Plin4	0.632942	0.606944	0.527503	509.574	27.8	1	8	8	17	1403	139.328	8.5874
	P01867	Ig gamma-2B chain C region OS	Igh-3	0.838975	0.353459	0.521275	60.2367	6.44	1	2	2	3	404	44.2312	6.52197
	Q05144	Ras-related C3 botulinum toxin substrate 2 OS	Rac2	1.14947	0.784385	0.512709	553.099	27.08	4	2	5	17	192	21.4271	7.60596
	Q5U405	Transmembrane protease serine 13 OS	Tmprss13	0.667868	0.712781	0.510777	152	1.47	1	1	1	37	543	59.7679	9.01221
	Q91V76	Ester hydrolase C11orf54 homolog OS	2	0.848444	0.781815	0.48213	76.96	12.06	1	3	3	4	315	34.9733	6.29053
	Q8VCT4	Carboxylesterase 1D OS	Ces1d	0.889512	0.445343	0.473256	1658.7	29.2	3	12	15	64	565	61.7487	6.60986
	P07759	Serine protease inhibitor A3K OS	Serpina3k	1.30682	0.271527	0.460145	871.454	31.58	5	5	10	25	418	46.85	5.16064
	Q03734	Serine protease inhibitor A3M OS	Serpina3m	1.02216	0.18744	0.458761	465.652	18.9	5	1	6	15	418	47.0343	6.1001
	P01837	Ig kappa chain C region OS	1	0.739849	0.366482	0.453711	88.3388	17.92	1	2	2	10	106	11.7706	5.41455
	P46412	Glutathione peroxidase 3 OS	Gpx3	0.890786	0.422752	0.415784	85.33	16.37	2	3	3	5	226	25.4088	8.22119
	P28665	Murinoglobulin-1 OS	Mug1	0.881635	0.416397	0.413888	261.433	5.42	2	8	8	13	1476	165.193	6.41748
	P07309	Transthyretin OS	Ttr	1.44438	0.34353	0.363266	154.423	18.37	1	4	4	7	147	15.766	6.16357
	Q6ZWY8	Thymosin beta-10 OS	Tmsb10	0	0.94633	0.142239	62.7583	15.91	2	1	1	4	44	5.02255	5.36377
