# Supplementary material for: Malaria in the postpartum period causes damage to the mammary gland
Source: PLoS One. 2021 Oct 13;16(10):e0258491. doi: 10.1371/journal.pone.0258491 (PMC8513860; doi:10.1371/journal.pone.0258491)
Supplement: S3 Table — Mice on day 12 post-mating were injected with 1 × 104 erythrocytes that had been infected with luciferase-expressing Plasmodium berghei (Pb) ANKA. The number, survival rate, and weight of pups were measured on day 0 post-delivery. Experiments using three mice were performed in duplicate with similar results. Asterisks indicate a significant difference (P < 0.05, compared with the pregnancy period of uninfected mice; Tukey-Kramer and Dunnett tests). (XLSX) [file pone.0258491.s006.xlsx]

## Sheet: Table S3
	Table S3. Pregnancy outcomes in pregnant mice infected with Pb ANKA.
	Micea		Parasites		Number of pup			Survival rate of pup (%)	Weight of pups (g)			Pregnancy period (day)
		Wild type		Uninfected	7.33	±	0.58	100	1.28	±	0.09	20	±	0
		Wild type		PbANKA	8.67	±	1.53	0	0.81	±	0.08*	18	±	0.00*
		IFNGR1-KO		PbANKA	7.33	±	0.58	100	1.08	±	0.1	20	±	1
